# Supplementary material for: Changes in the Staphylococcus aureus Transcriptome during Early Adaptation to the Lung
Source: PubMed Central journal article supplement (PMC3410880; doi:10.1371/journal.pone.0041329), 2012-08-02
Supplement: pone.0041329.s002.pdf [file pone.0041329.s002.pdf]

# MLST Type

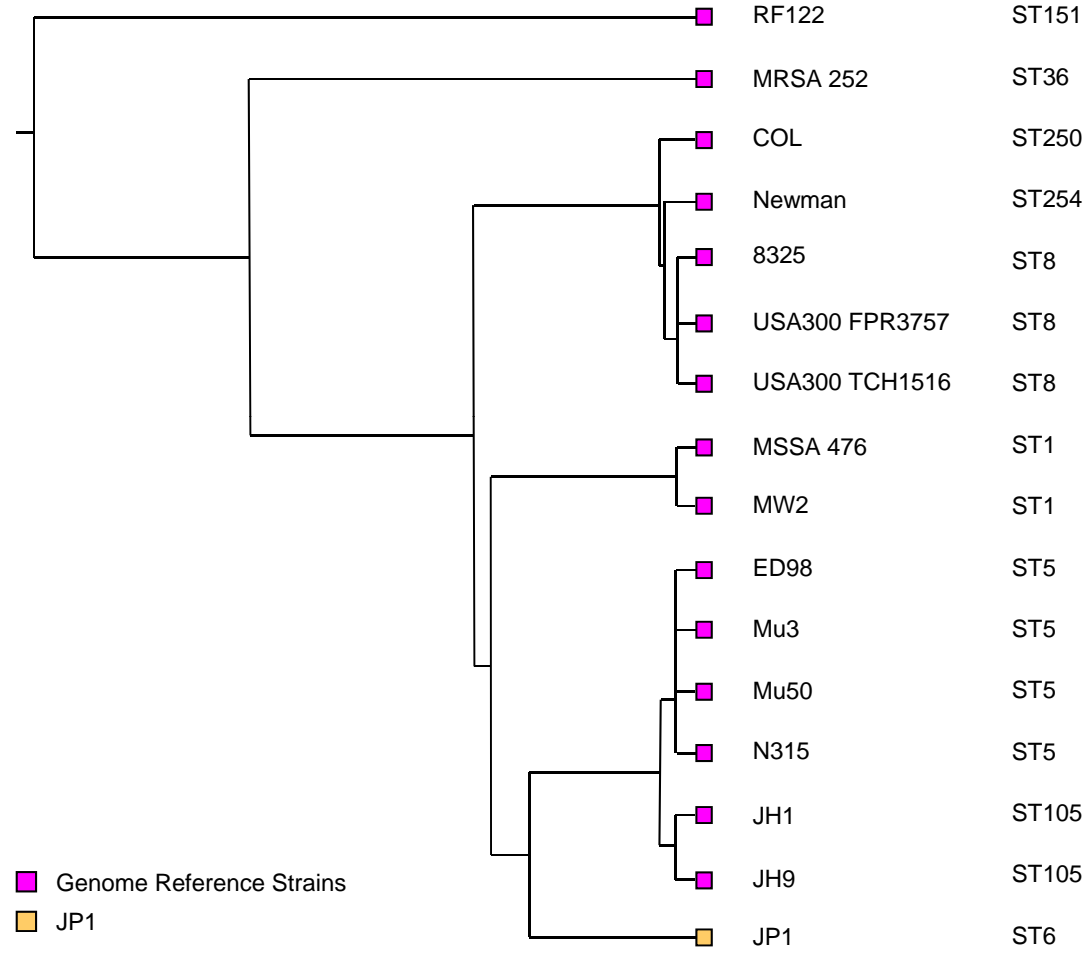

■ Genome Reference Strains  
■ JP1
