# Supplementary material for: Changes in the Staphylococcus aureus Transcriptome during Early Adaptation to the Lung
Source: PubMed Central journal article supplement (PMC3410880; doi:10.1371/journal.pone.0041329), 2012-08-02
Supplement: pone.0041329.s003.pdf [file pone.0041329.s003.pdf]

Supplemental Table 1a:

**PCR PRIMERS**

| <u>Operon/<br/>gene</u> | <u>Primer<br/>Type</u> | <u>Strand</u> | <u>Primer Name</u>  | <u>Sequence (5'-3')</u> | <u>Prod.<br/>Size</u> |
|-------------------------|------------------------|---------------|---------------------|-------------------------|-----------------------|
| sarS                    | PCR                    | +             | sarS-L              | AAAGTGGGGCTTTGAATGTG    | 1753                  |
| sarS                    | PCR                    | -             | sarS-R              | TGGGCGTACCTTATTCCTTG    |                       |
| rot                     | PCR                    | +             | rot-L               | CATGCTCCATTCATTTGTGC    | 1501                  |
| rot                     | PCR                    | -             | rot-R               | ATTTAGCCTCATTCGGTTTG    |                       |
| rsb                     | PCR                    | +             | rsb-L               | TCGCGACATTTATGTGGATAC   | 3673                  |
| rsb                     | PCR                    | -             | rsb-R               | GCTGAATGCAGTAGCTCACC    |                       |
| sarR                    | PCR                    | +             | sarR-L              | TTGCCACACATGGTTTTGTC    | 1348                  |
| sarR                    | PCR                    | -             | sarR-R              | ATTTTGTGAGCAAGCCATCC    |                       |
| sarUT                   | PCR                    | +             | sarUT-L             | TGCTTCTGCCTCTTGTTGAG    | 2424                  |
| sarUT                   | PCR                    | -             | sarUT-R             | AAGGTACGGCACCATCAAAC    |                       |
| agr                     | PCR                    | +             | agr-L               | AGATATCCTGCTCGCAGTGG    | 4729                  |
| agr                     | PCR                    | -             | agr-R               | AAAATTGCGCCATAGGATTG    |                       |
| srr                     | PCR                    | +             | srr-L               | CGATGCTTCTTCGCAAATTC    | 3476                  |
| srr                     | PCR                    | -             | srr-R               | ACTGTATGCGCTTTCCCTGTG   |                       |
| sae                     | PCR                    | +             | sae-L               | TTCCGGGATATTTTTCAACG    | 3974                  |
| sae                     | PCR                    | -             | sae-R               | TGCCCTCCTCTTATTTTGACTC  |                       |
| sarA                    | PCR                    | +             | sarA -L             | CGAACATTCAGGACATGCAC    | 1375                  |
| sarA                    | PCR                    | -             | sarA -R             | AAACATTTAATTGCGCTAAATCG |                       |
| spa (SA0095)            | PCR                    | +             | spaSA0095-L         | TTGAGGCGTTTCAGAAGTTG    | 2479                  |
| spa (SA0095)            | PCR                    | -             | spaSA0095-R         | AAACCTCAGCACATTCAAAGC   |                       |
| psm $\beta$ 1&2         | PCR                    | +             | psm $\beta$ 1&2 -L  | TCCAGCTGAGCTACCAGGAC    | 1326                  |
| psm $\beta$ 1&2         | PCR                    | -             | psm $\beta$ 1&2 -R  | GTGAAACGCCCATTCCTCTG    |                       |
| psm $\alpha$ 1-4        | PCR                    | +             | psm $\alpha$ 1-4 -L | ATTAGCAGAACGCCAAGACG    | 2586                  |
| psm $\alpha$ 1-4        | PCR                    | -             | psm $\alpha$ 1-4 -R | TGTCATACCCAGCAGAGTG     |                       |

Supplemental Table 1b:

**SEQUENCING PRIMERS**

| <u>Operon</u> | <u>Primer Type</u> | <u>Strand</u> | <u>Primer Name</u> | <u>Sequence (5'-3')</u> |
|---------------|--------------------|---------------|--------------------|-------------------------|
| sarS          | Sequencing         | +             | sarS-L1            | CGTTCTGCAATTTTCTCTCG    |
| sarS          | Sequencing         | -             | sarS-R1            | CAGATGATACCAAAAAGATAG   |
| rot           | Sequencing         | +             | rot-L1             | ATCCCAACAATCCCGAAAC     |
| rot           | Sequencing         | -             | rot-R1             | GCGATTGCAAGTAGAGCAAC    |
| rsb           | Sequencing         | +             | rsb-L1             | TCGAATCTATTTATGGCACC    |
| rsb           | Sequencing         | +             | rsb-L2             | GCTTCACTAACTGCAATCTTGG  |
| rsb           | Sequencing         | +             | rsb-L3             | CGAGTTCCATCTTGCTCATAGG  |
| rsb           | Sequencing         | +             | rsb-L4             | TCGTGTTTTGTGAACGTGATTC  |
| rsb           | Sequencing         | +             | rsb-L5             | CCACGATTAGTTGCCCTCCTC   |
| rsb           | Sequencing         | -             | rsb-R1             | GCGGCACAAAAAGTAAGTGG    |
| rsb           | Sequencing         | -             | rsb-R2             | CATAAACATATGCACCCACAAG  |
| rsb           | Sequencing         | -             | rsb-R3             | ACGGAGGTCGAATAACATGC    |
| rsb           | Sequencing         | -             | rsb-R4             | GGCGAAAGAGTCGAAATCAG    |
| rsb           | Sequencing         | -             | rsb-R5             | GCAATGGAAATGGGACAAAG    |
| rsb           | Sequencing         | -             | rsb-R6             | CGAAGTTAAAGTCGGTGGAG    |
| sarR          | Sequencing         | +             | sarR-L1            | CCTCTGATGCACATCTTGTTG   |
| sarR          | Sequencing         | -             | sarR-R1            | GCTAAGTGCTCAGAGTTCAAACC |
| sarUT         | Sequencing         | +             | sarUT-L1           | TGCTCTTGCTTTTCAAATCATTC |

|                  |            |   |                  |                          |
|------------------|------------|---|------------------|--------------------------|
| sarUT            | Sequencing | + | sarUT-L2         | TGAACGCCGTATTTTTGTTTC    |
| sarUT            | Sequencing | + | sarUT-L3         | AGAACGATCCCTTGCAGATG     |
| sarUT            | Sequencing | - | sarUT-R1         | AAAATACGGCGTTCATCTGC     |
| sarUT            | Sequencing | - | sarUT-R2         | AAGGGATGAAGACTTGATGAATG  |
| sarUT            | Sequencing | - | sarUT-R3         | TTCAATGCTATTGAGTTGATGG   |
| srr              | Sequencing | + | srr-L1           | AACGCTGCAATAGGCTGAAC     |
| srr              | Sequencing | + | srr-L2           | TCCATAATATCATTCGCCATC    |
| srr              | Sequencing | + | srr-L3           | TTCTGTGCTTTTTGTTGGATAGC  |
| srr              | Sequencing | + | srr-L4           | TATACCCAACGCCCCAGAC      |
| srr              | Sequencing | - | srr-R1           | GAGCCGGCTAAAATAGTGTCG    |
| srr              | Sequencing | - | srr-R2           | CGTTTAAGAGACCAAGCTACACG  |
| srr              | Sequencing | - | srr-R3           | CCATTGTCCTTGATGAATCG     |
| sarA             | Sequencing | + | sarA-L1          | CATCTTGCTCGATACATTTGC    |
| sarA             | Sequencing | - | sarA-R1          | AGGAAGATAGCCGCATAACG     |
| spa              | Sequencing | + | spa-L1           | GGCTTGTTATTGTCTTCCTC     |
| spa              | Sequencing | + | spa-L2           | CATTTGCAGCAGGTGTTACG     |
| spa              | Sequencing | + | spa-L3           | TTTTAGCTTCTGACAATAGG     |
| spa              | Sequencing | - | spa-R1           | TGCTAACCTATTGTCAGAAG     |
| spa              | Sequencing | - | spa-R2           | CAAACGGCACTACTGCTGAC     |
| psm $\beta$ 1&2  | Sequencing | + | psm $\beta$ -L1  | CGCAAATACTGTGCAAGCTG     |
| psm $\beta$ 1&2  | Sequencing | - | psm $\beta$ -R1  | TTTGTTTATCCGCACAACATC    |
| psm $\alpha$ 1-4 | Sequencing | + | psm $\alpha$ -L1 | CAAAGCCACCATCCCATTG      |
| psm $\alpha$ 1-4 | Sequencing | + | psm $\alpha$ -L2 | AATGGCCCCCTTCAAATAAG     |
| psm $\alpha$ 1-4 | Sequencing | + | psm $\alpha$ -L3 | AGGTCTCGTCTAGGCAAAGC     |
| psm $\alpha$ 1-4 | Sequencing | + | psm $\alpha$ -L4 | GGCTTTTTTCGGTATTCATGG    |
| psm $\alpha$ 1-4 | Sequencing | - | psm $\alpha$ -R1 | TGCTTTGCCTAGACGAGACC     |
| psm $\alpha$ 1-4 | Sequencing | - | psm $\alpha$ -R2 | TTCACATGGGTATCATTCG      |
| psm $\alpha$ 1-4 | Sequencing | - | psm $\alpha$ -R3 | TTGTGGCGTGTTTTATGTTTG    |
| psm $\alpha$ 1-4 | Sequencing | - | psm $\alpha$ -R4 | TCAATTTCTTGCGCATTGAC     |
| sae              | Sequencing | + | sae-L1           | CTGGGGGATATGTTTTACCTG    |
| sae              | Sequencing | + | sae-L2           | CACCATTATCGGCTCCTTTTC    |
| sae              | Sequencing | + | sae-L3           | CGTAAAACGAGTTCCCTTGG     |
| sae              | Sequencing | + | sae-L4           | ATTGCAATCTCTCCGAGTGG     |
| sae              | Sequencing | + | sae-L5           | GGGGCTGTGAAATCATACG      |
| sae              | Sequencing | + | sae-L6           | TCATGCTAACTCCTCATTTCTTC  |
| sae              | Sequencing | - | sae-R1           | CCCCTTACTGATCGTGGATG     |
| sae              | Sequencing | - | sae-R2           | GATGCTAATACCGTGAATGTCC   |
| sae              | Sequencing | - | sae-R3           | TTCTGAAGGACTACGTGATGG    |
| sae              | Sequencing | - | sae-R4           | AGCTAATGAACTCGCGCAAC     |
| sae              | Sequencing | - | sae-R5           | CCATGAGCTCAAACACTTCC     |
| agr              | Sequencing | + | agr-L1           | CACAAATAAACTCGGATGAAGC   |
| agr              | Sequencing | + | agr-L2           | CATTCGCGTTGCATTTATTG     |
| agr              | Sequencing | + | agr-L4           | AAAAGAAGCCCATTCCGTGTG    |
| agr              | Sequencing | + | agr-L5           | CATTGGTAACATCGCAGCTTATAG |
| agr              | Sequencing | + | agr-L7           | TGTGCCATTGAAATCACTCC     |
| agr              | Sequencing | + | agr-L8           | AGGGGCTCACGACCATAAC      |
| agr              | Sequencing | - | agr R1           | GAGGGCAATTTCCATAGGC      |
| agr              | Sequencing | - | agr-R2           | TTTAGCTTGCTCAAGCACCTC    |
| agr              | Sequencing | - | agr-R3           | GCTTCATCCGAGTTTTATTTGTG  |
| agr              | Sequencing | - | agr-R4           | TTGAATGAATTGGGCAAATG     |
