# Supplementary material for: Changes in the Staphylococcus aureus Transcriptome during Early Adaptation to the Lung
Source: PubMed Central journal article supplement (PMC3410880; doi:10.1371/journal.pone.0041329), 2012-08-02
Supplement: pone.0041329.s004.pdf [file pone.0041329.s004.pdf]

Supplemental table 2

| Gene/<br>Operon<br>Name | Closest Neighbor | Start<br>Sequence in<br>Neighbor | End<br>Sequence in<br>Neighbor | Mismatch? | # of<br>Mismatches | Location(s)<br>of<br>Mismatch* | Present in<br>Open<br>Reading<br>Frame | Synonymous/N<br>on<br>Synonymous? |
|-------------------------|------------------|----------------------------------|--------------------------------|-----------|--------------------|--------------------------------|----------------------------------------|-----------------------------------|
| JP1 <i>psmA</i>         | USA 300_TCH1516  | 475686                           | 477872                         | yes       | 40, 15 gaps        | 4                              | no                                     |                                   |
| JP1 <i>psmA</i>         |                  |                                  |                                |           |                    | 208                            | no                                     |                                   |
| JP1 <i>psmA</i>         |                  |                                  |                                |           |                    | 1365                           | no                                     |                                   |
| JP1 <i>psmA</i>         |                  |                                  |                                |           |                    | 1414                           | no                                     |                                   |
| JP1 <i>psmA</i>         |                  |                                  |                                |           |                    | 1451                           | no                                     |                                   |
| JP1 <i>psmA</i>         |                  |                                  |                                |           |                    | 1465                           | no                                     |                                   |
| JP1 <i>psmA</i>         |                  |                                  |                                |           |                    | 1472                           | no                                     |                                   |
| JP1 <i>psmA</i>         |                  |                                  |                                |           |                    | 1480                           | no                                     |                                   |
| JP1 <i>psmA</i>         |                  |                                  |                                |           |                    | 1503                           | no                                     |                                   |
| JP1 <i>psmA</i>         |                  |                                  |                                |           |                    | 1553                           | no                                     |                                   |
| JP1 <i>psmA</i>         |                  |                                  |                                |           |                    | 1576                           | no                                     |                                   |
| JP1 <i>psmA</i>         |                  |                                  |                                |           |                    | 1629                           | no                                     |                                   |
| JP1 <i>psmA</i>         |                  |                                  |                                |           |                    | 1676                           | no                                     |                                   |
| JP1 <i>psmA</i>         |                  |                                  |                                |           |                    | 1678                           | no                                     |                                   |
| JP1 <i>psmA</i>         |                  |                                  |                                |           |                    | 1698                           | no                                     |                                   |
| JP1 <i>psmA</i>         |                  |                                  |                                |           |                    | 1707                           | no                                     |                                   |
| JP1 <i>psmA</i>         |                  |                                  |                                |           |                    | 1724                           | no                                     |                                   |
| JP1 <i>psmA</i>         |                  |                                  |                                |           |                    | 1741                           | no                                     |                                   |
| JP1 <i>psmA</i>         |                  |                                  |                                |           |                    | 1743                           | no                                     |                                   |
| JP1 <i>psmA</i>         |                  |                                  |                                |           |                    | 1745                           | no                                     |                                   |
| JP1 <i>psmA</i>         |                  |                                  |                                |           |                    | 1746                           | no                                     |                                   |
| JP1 <i>psmA</i>         |                  |                                  |                                |           |                    | 1748                           | no                                     |                                   |
| JP1 <i>psmA</i>         |                  |                                  |                                |           |                    | 1750                           | no                                     |                                   |
| JP1 <i>psmA</i>         |                  |                                  |                                |           |                    | 1751                           | no                                     |                                   |
| JP1 <i>psmA</i>         |                  |                                  |                                |           |                    | 1755                           | no                                     |                                   |
| JP1 <i>psmA</i>         |                  |                                  |                                |           |                    | 1758                           | no                                     |                                   |
| JP1 <i>psmA</i>         |                  |                                  |                                |           |                    | 1760                           | no                                     |                                   |
| JP1 <i>psmA</i>         |                  |                                  |                                |           |                    | 1761                           | no                                     |                                   |
| JP1 <i>psmA</i>         |                  |                                  |                                |           |                    | 1894                           | no                                     |                                   |
| JP1 <i>psmA</i>         |                  |                                  |                                |           |                    | 1944                           | no                                     |                                   |
| JP1 <i>psmA</i>         |                  |                                  |                                |           |                    | 2056                           | no                                     |                                   |
| JP1 <i>psmA</i>         |                  |                                  |                                |           |                    | 2155                           | no                                     |                                   |
| JP1 <i>psmA</i>         |                  |                                  |                                |           |                    | 2161                           | no                                     |                                   |
| JP1 <i>psmβ</i>         | NCTC 8325        | 1088078                          | 1088962                        | yes       | 2                  | 41                             | no                                     |                                   |
| JP1 <i>psmβ</i>         |                  |                                  |                                |           |                    | 289                            | no                                     |                                   |
| JP1 <i>rot</i>          | MSSA476          | 1839756                          | 1838796                        | yes       | 2                  | 714                            | yes                                    | Synonymous                        |
| JP1 <i>rot</i>          |                  |                                  |                                |           |                    | 913                            | no                                     |                                   |
| Jp1 <i>rsb</i>          | USA 300_TCH1516  | 2188442                          | 2185235                        | yes       | 14                 | 381                            | yes                                    | Synonymous                        |
| Jp1 <i>rsb</i>          |                  |                                  |                                |           |                    | 468                            | yes                                    | Synonymous                        |
| Jp1 <i>rsb</i>          |                  |                                  |                                |           |                    | 1086                           | yes                                    | Synonymous                        |
| Jp1 <i>rsb</i>          |                  |                                  |                                |           |                    | 1729                           | yes                                    | Synonymous                        |
| Jp1 <i>rsb</i>          |                  |                                  |                                |           |                    | 2024                           | yes                                    | Synonymous                        |
| Jp1 <i>rsb</i>          |                  |                                  |                                |           |                    | 2165                           | yes                                    | Synonymous                        |
| Jp1 <i>rsb</i>          |                  |                                  |                                |           |                    | 2718                           | yes                                    | Synonymous                        |
| Jp1 <i>rsb</i>          |                  |                                  |                                |           |                    | 2838                           | yes                                    | Synonymous                        |
| Jp1 <i>rsb</i>          |                  |                                  |                                |           |                    | 2949                           | yes                                    | Synonymous                        |
| Jp1 <i>rsb</i>          |                  |                                  |                                |           |                    | 3012                           | yes                                    | Synonymous                        |
| Jp1 <i>rsb</i>          |                  |                                  |                                |           |                    | 3049                           | yes                                    | Synonymous                        |
| Jp1 <i>rsb</i>          |                  |                                  |                                |           |                    | 3061                           | no                                     |                                   |
| Jp1 <i>rsb</i>          |                  |                                  |                                |           |                    | 3175                           | no                                     |                                   |
| Jp1 <i>rsb</i>          |                  |                                  |                                |           |                    | 3176                           | no                                     |                                   |
| JP1 <i>sae</i>          | USA 300_TCH1516  | 783165                           | 779748                         | yes       | 10                 | 22                             | no                                     |                                   |
| JP1 <i>sae</i>          |                  |                                  |                                |           |                    | 680                            | no                                     |                                   |
| JP1 <i>sae</i>          |                  |                                  |                                |           |                    | 801                            | no                                     |                                   |
| JP1 <i>sae</i>          |                  |                                  |                                |           |                    | 853                            | no                                     |                                   |
| JP1 <i>sae</i>          |                  |                                  |                                |           |                    | 2558                           | yes                                    | Synonymous                        |
| JP1 <i>sae</i>          |                  |                                  |                                |           |                    | 2776                           | yes                                    | Synonymous                        |
| JP1 <i>sae</i>          |                  |                                  |                                |           |                    | 2898                           | yes                                    | Synonymous                        |
| JP1 <i>sae</i>          |                  |                                  |                                |           |                    | 2912                           | yes                                    | Synonymous                        |
| JP1 <i>sae</i>          |                  |                                  |                                |           |                    | 3268                           | no                                     |                                   |
| JP1 <i>sae</i>          |                  |                                  |                                |           |                    | 3410                           | no                                     |                                   |
| JP1 <i>sarA</i>         | USA 300_TCH1516  | 679678                           | 678779                         | yes       | 3, 2 gaps          | 24                             | no                                     |                                   |
| JP1 <i>sarA</i>         |                  |                                  |                                |           |                    | 720                            | no                                     |                                   |
| JP1 <i>sarA</i>         |                  |                                  |                                |           |                    | 923                            | no                                     |                                   |
| JP1 <i>sarR</i>         | USA 300_TCH1516  | 2411516                          | 2410536                        | yes       | 2                  | 111                            | no                                     |                                   |
| JP1 <i>sarR</i>         |                  |                                  |                                |           |                    | 896                            | no                                     |                                   |
| JP1 <i>sarS</i>         | Mu3              | 125598                           | 124229                         | yes       | 1                  | 1303                           | no                                     |                                   |
| JP1 <i>sarUT</i>        | MSSA476          | 2555691                          | 2553325                        | yes       | 8                  | 202                            | no                                     |                                   |

Supplemental table 2

| Gene/<br>Operon<br>Name | Closest Neighbor | Start<br>Sequence in<br>Neighbor | End<br>Sequence in<br>Neighbor | Mismatch? | # of<br>Mismatches | Location(s)<br>of<br>Mismatch* | Present in<br>Open<br>Reading<br>Frame | Synonymous/N<br>on<br>Synonymous? |
|-------------------------|------------------|----------------------------------|--------------------------------|-----------|--------------------|--------------------------------|----------------------------------------|-----------------------------------|
| JP1 <i>sarUT</i>        |                  |                                  |                                |           |                    | 205                            | no                                     |                                   |
| JP1 <i>sarUT</i>        |                  |                                  |                                |           |                    | 282                            | no                                     |                                   |
| JP1 <i>sarUT</i>        |                  |                                  |                                |           |                    | 318                            | no                                     |                                   |
| JP1 <i>sarUT</i>        |                  |                                  |                                |           |                    | 1028                           | yes                                    | Synonymous                        |
| JP1 <i>sarUT</i>        |                  |                                  |                                |           |                    | 1408                           | no                                     |                                   |
| JP1 <i>sarUT</i>        |                  |                                  |                                |           |                    | 2089                           | no                                     |                                   |
| JP1 <i>sarUT</i>        |                  |                                  |                                |           |                    | 2352                           | no                                     |                                   |
| JP1 <i>spa</i>          | Newman           | 75250                            | 73247                          | yes       | 31, 1 gap          | 10                             | no                                     | Synonymous                        |
| JP1 <i>spa</i>          |                  |                                  |                                |           |                    | 1328                           | yes                                    | Synonymous                        |
| JP1 <i>spa</i>          |                  |                                  |                                |           |                    | 1352                           | yes                                    | Synonymous                        |
| JP1 <i>spa</i>          |                  |                                  |                                |           |                    | 1361                           | yes                                    | Synonymous                        |
| JP1 <i>spa</i>          |                  |                                  |                                |           |                    | 1362                           | yes                                    | Synonymous                        |
| JP1 <i>spa</i>          |                  |                                  |                                |           |                    | 1363                           | yes                                    | Synonymous                        |
| JP1 <i>spa</i>          |                  |                                  |                                |           |                    | 1376                           | yes                                    | Synonymous                        |
| JP1 <i>spa</i>          |                  |                                  |                                |           |                    | 1386                           | yes                                    | Synonymous                        |
| JP1 <i>spa</i>          |                  |                                  |                                |           |                    | 1387                           | yes                                    | Synonymous                        |
| JP1 <i>spa</i>          |                  |                                  |                                |           |                    | 1391                           | yes                                    | Synonymous                        |
| JP1 <i>spa</i>          |                  |                                  |                                |           |                    | 1394                           | yes                                    | Synonymous                        |
| JP1 <i>spa</i>          |                  |                                  |                                |           |                    | 1409                           | yes                                    | Synonymous                        |
| JP1 <i>spa</i>          |                  |                                  |                                |           |                    | 1410                           | yes                                    | Synonymous                        |
| JP1 <i>spa</i>          |                  |                                  |                                |           |                    | 1411                           | yes                                    | Synonymous                        |
| JP1 <i>spa</i>          |                  |                                  |                                |           |                    | 1415                           | yes                                    | Synonymous                        |
| JP1 <i>spa</i>          |                  |                                  |                                |           |                    | 1418                           | yes                                    | Synonymous                        |
| JP1 <i>spa</i>          |                  |                                  |                                |           |                    | 1433                           | yes                                    | Synonymous                        |
| JP1 <i>spa</i>          |                  |                                  |                                |           |                    | 1434                           | yes                                    | Synonymous                        |
| JP1 <i>spa</i>          |                  |                                  |                                |           |                    | 1435                           | yes                                    | Synonymous                        |
| JP1 <i>spa</i>          |                  |                                  |                                |           |                    | 1439                           | yes                                    | Synonymous                        |
| JP1 <i>spa</i>          |                  |                                  |                                |           |                    | 1442                           | yes                                    | Synonymous                        |
| JP1 <i>spa</i>          |                  |                                  |                                |           |                    | 1458                           | yes                                    | Synonymous                        |
| JP1 <i>spa</i>          |                  |                                  |                                |           |                    | 1459                           | yes                                    | Synonymous                        |
| JP1 <i>spa</i>          |                  |                                  |                                |           |                    | 1463                           | yes                                    | Synonymous                        |
| JP1 <i>spa</i>          |                  |                                  |                                |           |                    | 1466                           | yes                                    | Synonymous                        |
| JP1 <i>spa</i>          |                  |                                  |                                |           |                    | 1472                           | yes                                    | Synonymous                        |
| JP1 <i>spa</i>          |                  |                                  |                                |           |                    | 1482                           | yes                                    | Synonymous                        |
| JP1 <i>spa</i>          |                  |                                  |                                |           |                    | 1490                           | yes                                    | Synonymous                        |
| JP1 <i>spa</i>          |                  |                                  |                                |           |                    | 1496                           | yes                                    | Synonymous                        |
| JP1 <i>spa</i>          |                  |                                  |                                |           |                    | 1508                           | yes                                    | Synonymous                        |
| JP1 <i>spa</i>          |                  |                                  |                                |           |                    | 1511                           | yes                                    | 8 codon insertion                 |
| JP1 <i>srrAB</i>        | Newman           | 1571047                          | 1568120                        | yes       | 3                  | 703                            | yes                                    | Synonymous                        |
| JP1 <i>srrAB</i>        |                  |                                  |                                |           |                    | 2916                           | no                                     |                                   |
| JP1 <i>srrAB</i>        |                  |                                  |                                |           |                    | 2918                           | no                                     |                                   |

\*Locations of mismatches are from the start of the JP1 sequence
