# Supplementary material for: Changes in the Staphylococcus aureus Transcriptome during Early Adaptation to the Lung
Source: PubMed Central journal article supplement (PMC3410880; doi:10.1371/journal.pone.0041329), 2012-08-02
Supplement: pone.0041329.s005.pdf [file pone.0041329.s005.pdf]

| Systematic            | COL | N315 | MRSA | MSSA | Mu50 | MW2 | GENE<br>NAME | GenBank ID         | GenBank Desc.                                                                        | Protein Function | TIGR Main Role | TIGR Sub Role |
|-----------------------|-----|------|------|------|------|-----|--------------|--------------------|--------------------------------------------------------------------------------------|------------------|----------------|---------------|
| AB009866-cds25_at     |     |      |      |      |      |     |              | AB009866-cds25     | bacteriophage phi PVL (specific_host:Staphylococcus aureus ATCC 49775) proviral DNA. |                  |                |               |
| AP001553-cds11_at     |     |      |      |      |      |     |              | AB009866-cds33     | bacteriophage phi PVL (specific_host:Staphylococcus aureus ATCC 49775) proviral DNA. |                  |                |               |
| AB009866-cds50_x_at   |     |      |      |      |      |     |              | AB009866-cds50     | bacteriophage phi PVL (specific_host:Staphylococcus aureus ATCC 49775) proviral DNA. |                  |                |               |
| AB047088-cds7_s_at    |     |      |      |      |      |     |              | AB014438-cds7      | Staphylococcus aureus (strain:85/3907) DNA.                                          |                  |                |               |
| AB033763-cds11_at     |     |      |      |      |      |     |              | AB033763-cds11     | Staphylococcus aureus (strain:NCTC10442) DNA                                         |                  |                |               |
| AB033763-cds2_at      |     |      |      |      |      |     |              | AB033763-cds2      | Staphylococcus aureus (strain:NCTC10442) DNA                                         |                  |                |               |
| AB033763-cds20_at     |     |      |      |      |      |     |              | AB033763-cds20     | Staphylococcus aureus (strain:NCTC10442) DNA                                         |                  |                |               |
| AB033763-cds27_at     |     |      |      |      |      |     |              | AB033763-cds27     | Staphylococcus aureus (strain:NCTC10442) DNA                                         |                  |                |               |
| AB033763-cds29_at     |     |      |      |      |      |     |              | AB033763-cds29     | Staphylococcus aureus (strain:NCTC10442) DNA                                         |                  |                |               |
| AB033763-cds4_at      |     |      |      |      |      |     |              | AB033763-cds4      | Staphylococcus aureus (strain:NCTC10442) DNA                                         |                  |                |               |
| AB033763-cds46_at     |     |      |      |      |      |     |              | AB033763-cds46     | Staphylococcus aureus (strain:NCTC10442) DNA                                         |                  |                |               |
| AB033763-cds8_at      |     |      |      |      |      |     |              | AB033763-cds8      | Staphylococcus aureus (strain:NCTC10442) DNA                                         |                  |                |               |
| AB037671-cds10_at     |     |      |      |      |      |     |              | AB037671-cds10     | Staphylococcus aureus (strain:85/2082) DNA.                                          |                  |                |               |
| AB037671-cds11_at     |     |      |      |      |      |     |              | AB037671-cds11     | Staphylococcus aureus (strain:85/2082) DNA.                                          |                  |                |               |
| AB037671-cds21_at     |     |      |      |      |      |     |              | AB037671-cds21     | Staphylococcus aureus (strain:85/2082) DNA.                                          |                  |                |               |
| AB037671-cds23_at     |     |      |      |      |      |     |              | AB037671-cds23     | Staphylococcus aureus (strain:85/2082) DNA.                                          |                  |                |               |
| AB037671-cds28_at     |     |      |      |      |      |     |              | AB037671-cds28     | Staphylococcus aureus (strain:85/2082) DNA.                                          |                  |                |               |
| AB037671-cds46_at     |     |      |      |      |      |     |              | AB037671-cds46     | Staphylococcus aureus (strain:85/2082) DNA.                                          |                  |                |               |
| AB037671-cds47_at     |     |      |      |      |      |     |              | AB037671-cds47     | Staphylococcus aureus (strain:85/2082) DNA.                                          |                  |                |               |
| AB037671-cds49_at     |     |      |      |      |      |     |              | AB037671-cds49     | Staphylococcus aureus (strain:85/2082) DNA.                                          |                  |                |               |
| AB037671-cds52_at     |     |      |      |      |      |     |              | AB037671-cds52     | Staphylococcus aureus (strain:85/2082) DNA.                                          |                  |                |               |
| AB037671-cds53_at     |     |      |      |      |      |     |              | AB037671-cds53     | Staphylococcus aureus (strain:85/2082) DNA.                                          |                  |                |               |
| AB037671-cds54_at     |     |      |      |      |      |     |              | AB037671-cds54     | Staphylococcus aureus (strain:85/2082) DNA.                                          |                  |                |               |
| AB037671-cds55_at     |     |      |      |      |      |     |              | AB037671-cds55     | Staphylococcus aureus (strain:85/2082) DNA.                                          |                  |                |               |
| AB037671-cds56_at     |     |      |      |      |      |     |              | AB037671-cds56     | Staphylococcus aureus (strain:85/2082) DNA.                                          |                  |                |               |
| AB037671-cds57_at     |     |      |      |      |      |     |              | AB037671-cds57     | Staphylococcus aureus (strain:85/2082) DNA.                                          |                  |                |               |
| AB037671-cds59_at     |     |      |      |      |      |     |              | AB037671-cds59     | Staphylococcus aureus (strain:85/2082) DNA.                                          |                  |                |               |
| AB037671-cds61_at     |     |      |      |      |      |     |              | AB037671-cds61     | Staphylococcus aureus (strain:85/2082) DNA.                                          |                  |                |               |
| AB037671-cds60_at     |     |      |      |      |      |     |              | AB037671-cds60     | Staphylococcus aureus (strain:85/2082) DNA.                                          |                  |                |               |
| AB037671-cds61_at     |     |      |      |      |      |     |              | AB037671-cds61     | Staphylococcus aureus (strain:85/2082) DNA.                                          |                  |                |               |
| AB037671-cds62_at     |     |      |      |      |      |     |              | AB037671-cds62     | Staphylococcus aureus (strain:85/2082) DNA.                                          |                  |                |               |
| AB037671-cds63_at     |     |      |      |      |      |     |              | AB037671-cds63     | Staphylococcus aureus (strain:85/2082) DNA.                                          |                  |                |               |
| AB037671-cds66_at     |     |      |      |      |      |     |              | AB037671-cds66     | Staphylococcus aureus (strain:85/2082) DNA.                                          |                  |                |               |
| AB037671-cds67_at     |     |      |      |      |      |     |              | AB037671-cds67     | Staphylococcus aureus (strain:85/2082) DNA.                                          |                  |                |               |
| AB037671-cds68_at     |     |      |      |      |      |     |              | AB037671-cds68     | Staphylococcus aureus (strain:85/2082) DNA.                                          |                  |                |               |
| AB037671-cds69_at     |     |      |      |      |      |     |              | AB037671-cds69     | Staphylococcus aureus (strain:85/2082) DNA.                                          |                  |                |               |
| AB037671-cds7_at      |     |      |      |      |      |     |              | AB037671-cds7      | Staphylococcus aureus (strain:85/2082) DNA.                                          |                  |                |               |
| AB037671-cds70_at     |     |      |      |      |      |     |              | AB037671-cds70     | Staphylococcus aureus (strain:85/2082) DNA.                                          |                  |                |               |
| AB037671-cds80_at     |     |      |      |      |      |     |              | AB037671-cds80     | Staphylococcus aureus (strain:85/2082) DNA.                                          |                  |                |               |
| AB037671-cds81_at     |     |      |      |      |      |     |              | AB037671-cds81     | Staphylococcus aureus (strain:85/2082) DNA.                                          |                  |                |               |
| AB037671-cds85_at     |     |      |      |      |      |     |              | AB037671-cds85     | Staphylococcus aureus (strain:85/2082) DNA.                                          |                  |                |               |
| AB037671-cds87_at     |     |      |      |      |      |     |              | AB037671-cds87     | Staphylococcus aureus (strain:85/2082) DNA.                                          |                  |                |               |
| AB047089-cds3_x_at    |     |      |      |      |      |     |              | AB047089-cds3      | Staphylococcus aureus (strain:85/3907) DNA.                                          |                  |                |               |
| AB047089-cds4_at      |     |      |      |      |      |     |              | AB047089-cds4      | Staphylococcus aureus (strain:85/3907) DNA.                                          |                  |                |               |
| AF051916-cds2_at      |     |      |      |      |      |     |              | AF051916-cds2      | Gene:rep:Product:replication protein Rep                                             |                  |                |               |
| AF051917-cds10_at     |     |      |      |      |      |     |              | AF051917-cds10     | Gene:Product:putative membrane protein;Note:Orf77                                    |                  |                |               |
| AF051917-cds11_at     |     |      |      |      |      |     |              | AF051917-cds11     | Gene:Product:unknown;Note:Orf346                                                     |                  |                |               |
| AF051917-cds12_at     |     |      |      |      |      |     |              | AF051917-cds12     | Gene:Product:unknown;Note:Orf109                                                     |                  |                |               |
| AF051917-cds13_at     |     |      |      |      |      |     |              | AF051917-cds13     | Gene:Product:unknown;Note:Orf86                                                      |                  |                |               |
| AF051917-cds14_at     |     |      |      |      |      |     |              | AF051917-cds14     | Gene:rep:Product:putative replication initiation protein Rep                         |                  |                |               |
| AF051917-cds16_at     |     |      |      |      |      |     |              | AF051917-cds16     | Gene:Product:membrane protein;Note:Orf248                                            |                  |                |               |
| AF051917-cds36_at     |     |      |      |      |      |     |              | AF051917-cds36     | Gene:Product:unknown;Note:Orf55; possibly truncated by IS257 transposon              |                  |                |               |
| AF051917-cds9_at      |     |      |      |      |      |     |              | AF051917-cds9      | Gene:rep(RC):Product:putative replication initiation protein Rep(RC)                 |                  |                |               |
| AF051917-cds7_at      |     |      |      |      |      |     |              | AF051917-cds7      | Gene:Product:LtrC-like protein;Note:Orf575; similar to Lactococcus lactis pRS01 LtrC |                  |                |               |
| AF051917-cds9_at      |     |      |      |      |      |     |              | AF051917-cds9      | Gene:Product:unknown;Note:Orf90                                                      |                  |                |               |
| AF053140-cds2_at      |     |      |      |      |      |     |              | AF053140-cds2      | Gene:sej:Product:enterotoxin J                                                       |                  |                |               |
| AF077865-cds1_at      |     |      |      |      |      |     |              | AF077865-cds1      | Gene:sear:Product:unknown                                                            |                  |                |               |
| AF117258-cds1_at      |     |      |      |      |      |     |              | AF117258-cds1      | Gene:repE:Product:replication protein RepE;Note:similar to RepE from pAMBeta1        |                  |                |               |
| AF117258-cds2_at      |     |      |      |      |      |     |              | AF117258-cds2      | Gene:Product:unknown;Note:OrfA; contains four hydrophobic domains                    |                  |                |               |
| AF117258-cds3_at      |     |      |      |      |      |     |              | AF117258-cds3      | Gene:res:Product:resolvase;Note:Res; similar to resolvase from pAMBeta1              |                  |                |               |
| AF117259-cds1_at      |     |      |      |      |      |     |              | AF117259-cds1      | Gene:repX:Product:replication protein                                                |                  |                |               |
| AF117259-cds2_at      |     |      |      |      |      |     |              | AF117259-cds2      | Gene:Product:unknown;Note:OrfB                                                       |                  |                |               |
| AF147744-cds1_at      |     |      |      |      |      |     |              | AF147744-cds1      | Gene:Product:antibiotic structural protein alpha;Note:SacAa                          |                  |                |               |
| AF147744-cds2_at      |     |      |      |      |      |     |              | AF147744-cds2      | Gene:Product:antibiotic structural protein beta;Note:SacBa                           |                  |                |               |
| AF147744-cds3_at      |     |      |      |      |      |     |              | AF147744-cds3      | Gene:Product:antibiotic modifying enzyme;Note:SacM1                                  |                  |                |               |
| AF147744-cds4_at      |     |      |      |      |      |     |              | AF147744-cds4      | Gene:Product:transporter;Note:SacT                                                   |                  |                |               |
| AF167161-cds1_at      |     |      |      |      |      |     |              | AF167161-cds1      | Gene:Product:unknown;Note:orf1                                                       |                  |                |               |
| AF167161-cds2_at      |     |      |      |      |      |     |              | AF167161-cds2      | Gene:Product:unknown;Note:orf2                                                       |                  |                |               |
| WAN014INJ_at          |     |      |      |      |      |     |              | AF167161-cds6      | Gene:sin:Product:recombinase                                                         |                  |                |               |
| AF167161-cds7_at      |     |      |      |      |      |     |              | AF167161-cds7      | Gene:Product:unknown;Note:orf4                                                       |                  |                |               |
| AF186237-cds1_at      |     |      |      |      |      |     |              | AF186237-cds1      | Gene:vgaA variant;Product:ABC protein VgaA variant                                   |                  |                |               |
| AF203376-cds1_at      |     |      |      |      |      |     |              | AF203376-cds1      | Gene:orf245;Product:replication-associated protein;Note:Orf245                       |                  |                |               |
| AF203376-cds2_at      |     |      |      |      |      |     |              | AF203376-cds2      | Gene:rep:Product:replication initiation protein;Note:Rep                             |                  |                |               |
| AF203377-cds1_at      |     |      |      |      |      |     |              | AF203377-cds1      | Gene:orf256;Product:replication-associated protein;Note:Orf256                       |                  |                |               |
| AF203377-cds2_at      |     |      |      |      |      |     |              | AF203377-cds2      | Gene:rep:Product:replication initiation protein;Note:Rep                             |                  |                |               |
| AF210055-cds1_at      |     |      |      |      |      |     |              | AF210055-cds1      | Gene:agrB;Product:AgrB;Note:processing protein for AgrD                              |                  |                |               |
| AF217235-cds18_at     |     |      |      |      |      |     |              | AF217235-cds18     | Gene:Product:Orf16                                                                   |                  |                |               |
| AF217235-cds19_at     |     |      |      |      |      |     |              | AF217235-cds19     | Gene:Product:Orf19                                                                   |                  |                |               |
| AF217235-cds20_at     |     |      |      |      |      |     |              | AF217235-cds20     | Gene:Product:Orf20                                                                   |                  |                |               |
| AF217235-cds21_at     |     |      |      |      |      |     |              | AF217235-cds21     | Gene:Product:integrase-like protein                                                  |                  |                |               |
| AF217235-cds6_at      |     |      |      |      |      |     |              | AF217235-cds6      | Gene:Product:Orf6                                                                    |                  |                |               |
| AF217235-cds8_x_at    |     |      |      |      |      |     |              | AF217235-cds8      | Gene:Product:Orf8                                                                    |                  |                |               |
| AF217235-cds9_at      |     |      |      |      |      |     |              | AF217235-cds9      | Gene:Product:Orf9                                                                    |                  |                |               |
| AF288402-cds1-seg1_at |     |      |      |      |      |     |              | AF288402-cds1-seg1 | Gene:Bap;Product:biofilm-associated surface protein                                  |                  |                |               |
| AF288402-cds1-seg2_at |     |      |      |      |      |     |              | AF288402-cds1-seg2 | Gene:Bap;Product:biofilm-associated surface protein                                  |                  |                |               |
| AJ243790-cds1_at      |     |      |      |      |      |     |              | AJ132841-cds1      | Gene:mapN;Product:MapN protein                                                       |                  |                |               |
| AJ27173-cds1_at       |     |      |      |      |      |     |              | AJ27173-cds1       | Gene:Product:ADP-ribosyltransferase;Note:C3-like                                     |                  |                |               |
| AJ309178-cds1_at      |     |      |      |      |      |     |              | AJ309178-cds1      | Gene:coa:Product:coagulase                                                           |                  |                |               |
| AJ309180-cds1_at      |     |      |      |      |      |     |              | AJ309180-cds1      | Gene:coa:Product:coagulase                                                           |                  |                |               |
| AJ309181-cds1_at      |     |      |      |      |      |     |              | AJ309181-cds1      | Gene:coa:Product:coagulase                                                           |                  |                |               |
| AJ309182-cds1_at      |     |      |      |      |      |     |              | AJ309182-cds1      | Gene:coa:Product:coagulase                                                           |                  |                |               |
| AJ309184-cds1_at      |     |      |      |      |      |     |              | AJ309184-cds1      | Gene:coa:Product:coagulase                                                           |                  |                |               |
| AJ309185-cds1_at      |     |      |      |      |      |     |              | AJ309185-cds1      | Gene:coa:Product:coagulase                                                           |                  |                |               |
| AJ309190-cds1_at      |     |      |      |      |      |     |              | AJ309190-cds1      | Gene:coa:Product:coagulase                                                           |                  |                |               |
| AJ309191-cds1_x_at    |     |      |      |      |      |     |              | AJ309191-cds1      | Gene:coa:Product:coagulase                                                           |                  |                |               |
| AJ311975-cds1_at      |     |      |      |      |      |     |              | AJ311975-cds1      | Gene:coa:Product:coagulase                                                           |                  |                |               |
| AJ311976-cds1_at      |     |      |      |      |      |     |              | AJ311976-cds1      | Gene:coa:Product:coagulase                                                           |                  |                |               |
| AJ311977-cds1_at      |     |      |      |      |      |     |              | AJ311977-cds1      | Gene:coa:Product:coagulase                                                           |                  |                |               |
| AP001553-cds10_at     |     |      |      |      |      |     |              | AP001553-cds10     | bacteriophage phi ETA (specific_host:Staphylococcus aureus E-1) DNA.                 |                  |                |               |
| AP001553-cds12_at     |     |      |      |      |      |     |              | AP001553-cds12     | bacteriophage phi ETA (specific_host:Staphylococcus aureus E-1) DNA.                 |                  |                |               |
| AP001553-cds19_x_at   |     |      |      |      |      |     |              | AP001553-cds19     | bacteriophage phi ETA (specific_host:Staphylococcus aureus E-1) DNA.                 |                  |                |               |
| AP001553-cds2_at      |     |      |      |      |      |     |              | AP001553-cds2      | bacteriophage phi ETA (specific_host:Staphylococcus aureus E-1) DNA.                 |                  |                |               |

| Systematic        | COL    | N315   | MRSA    | MSSA    | Mu50    | MW2    | GENE<br>NAME | GenBank ID     | GenBank Desc.                                                                | Protein Function | TIGR Main Role | TIGR Sub Role |
|-------------------|--------|--------|---------|---------|---------|--------|--------------|----------------|------------------------------------------------------------------------------|------------------|----------------|---------------|
| AP001553-cds21_at |        |        |         |         |         |        |              | AP001553-cds21 | bacteriophage phi ETA (specific_host:Staphylococcus aureus E-1) DNA.         |                  |                |               |
| AP001553-cds7_at  |        |        |         |         |         |        |              | AP001553-cds7  | bacteriophage phi ETA (specific_host:Staphylococcus aureus E-1) DNA.         |                  |                |               |
| AP001553-cds3_at  |        |        |         |         |         |        |              | AP001553-cds3  | bacteriophage phi ETA (specific_host:Staphylococcus aureus E-1) DNA.         |                  |                |               |
| AP001553-cds31_at |        |        |         |         |         |        |              | AP001553-cds31 | bacteriophage phi ETA (specific_host:Staphylococcus aureus E-1) DNA.         |                  |                |               |
| AP001553-cds5_at  |        |        |         |         |         |        |              | AP001553-cds5  | bacteriophage phi ETA (specific_host:Staphylococcus aureus E-1) DNA.         |                  |                |               |
| AP001553-cds54_at |        |        |         |         |         |        |              | AP001553-cds54 | bacteriophage phi ETA (specific_host:Staphylococcus aureus E-1) DNA.         |                  |                |               |
| AP001553-cds57_at |        |        |         |         |         |        |              | AP001553-cds57 | bacteriophage phi ETA (specific_host:Staphylococcus aureus E-1) DNA.         |                  |                |               |
| AP001553-cds2_at  |        |        |         |         |         |        |              | AP001553-cds2  | bacteriophage phi ETA (specific_host:Staphylococcus aureus E-1) DNA.         |                  |                |               |
| AP001553-cds61_at |        |        |         |         |         |        |              | AP001553-cds61 | bacteriophage phi ETA (specific_host:Staphylococcus aureus E-1) DNA.         |                  |                |               |
| WAN014HKY_at      |        |        |         |         |         |        |              | AP001553-cds66 | bacteriophage phi ETA (specific_host:Staphylococcus aureus E-1) DNA.         |                  |                |               |
| AP001553-cds8_at  |        |        |         |         |         |        |              | AP001553-cds8  | bacteriophage phi ETA (specific_host:Staphylococcus aureus E-1) DNA.         |                  |                |               |
| AP001553-cds9_at  |        |        |         |         |         |        |              | AP001553-cds9  | bacteriophage phi ETA (specific_host:Staphylococcus aureus E-1) DNA.         |                  |                |               |
| AY029184-cds1_at  |        |        |         |         |         |        |              | AY029184-cds1  | Staphylococcus aureus.                                                       |                  |                |               |
| D83951-cds2_at    |        |        |         |         |         |        |              | D83951-cds2    | Staphylococcus aureus (strain:P83) DNA.                                      |                  |                |               |
| J01763-cds1_at    |        |        |         |         |         |        |              | J01763-cds1    | Plasmid pSN2 DNA.                                                            |                  |                |               |
| J03947-cds1_at    |        |        |         |         |         |        |              | J03947-cds1    | S.aureus (strain BM4611) DNA.                                                |                  |                |               |
| L43062-cds1_at    |        |        |         |         |         |        |              | L43062-cds1    | Staphylococcus aureus.                                                       |                  |                |               |
| M17348-cds1_at    |        |        |         |         |         |        |              | M17348-cds1    | Plasmid pRW001 DNA.                                                          |                  |                |               |
| M17990-cds1_at    |        |        |         |         |         |        |              | M17990-cds1    | Plasmid pE5 DNA.                                                             |                  |                |               |
| M18086-cds1_s_at  |        |        |         |         |         |        |              | M18086-cds1    | Staphylococcus aureus (strain SK982) DNA.                                    |                  |                |               |
| M21319-cds1_at    |        |        |         |         |         |        |              | M21319-cds1    | S.aureus (strain FRI918) DNA                                                 |                  |                |               |
| M32470-cds1_at    |        |        |         |         |         |        |              | M32470-cds1    | S.aureus (strain 3A1) DNA.                                                   |                  |                |               |
| M32470-cds2_at    |        |        |         |         |         |        |              | M32470-cds2    | S.aureus (strain 3A1) DNA.                                                   |                  |                |               |
| M63917-cds1_at    |        |        |         |         |         |        |              | M63917-cds1    | S.aureus DNA.                                                                |                  |                |               |
| AF282215-cds2_at  |        |        |         |         |         |        |              |                | Staphylococcus aureus GENE="agrB"                                            |                  |                |               |
| AF282215-cds4_at  |        |        |         |         |         |        |              |                | Staphylococcus aureus Bacteria; GENE="agrC"                                  |                  |                |               |
| WAN014IY1_at      |        |        |         |         |         |        |              |                | Staphylococcus epidermidis Bacteria; GENE="trnYE"                            |                  |                |               |
| U10927-cds1_at    |        |        |         |         |         |        |              | U10927-cds1    | Gene:capA;Product:CapA                                                       |                  |                |               |
| U10927-cds10_at   |        |        |         |         |         |        |              | U10927-cds10   | Gene:capJ;Product:CapJ                                                       |                  |                |               |
| U10927-cds11_at   |        |        |         |         |         |        |              | U10927-cds11   | Gene:capK;Product:CapK                                                       |                  |                |               |
| U10927-cds12_at   |        |        |         |         |         |        |              | U10927-cds12   | Gene:capL;Product:CapL                                                       |                  |                |               |
| U10927-cds13_at   |        |        |         |         |         |        |              | U10927-cds13   | Gene:capM;Product:CapM                                                       |                  |                |               |
| U10927-cds2_at    |        |        |         |         |         |        |              | U10927-cds2    | Gene:capB;Product:CapB                                                       |                  |                |               |
| U10927-cds3_at    |        |        |         |         |         |        |              | U10927-cds3    | Gene:capC;Product:CapC                                                       |                  |                |               |
| U10927-cds4_at    |        |        |         |         |         |        |              | U10927-cds4    | Gene:capD;Product:CapD                                                       |                  |                |               |
| U10927-cds5_at    |        |        |         |         |         |        |              | U10927-cds5    | Gene:capE;Product:CapE                                                       |                  |                |               |
| U10927-cds6_at    |        |        |         |         |         |        |              | U10927-cds6    | Gene:capF;Product:CapF                                                       |                  |                |               |
| U10927-cds7_at    |        |        |         |         |         |        |              | U10927-cds7    | Gene:capG;Product:CapG                                                       |                  |                |               |
| U10927-cds8_at    |        |        |         |         |         |        |              | U10927-cds8    | Gene:capH;Product:CapH                                                       |                  |                |               |
| U10927-cds9_at    |        |        |         |         |         |        |              | U10927-cds9    | Gene:capI;Product:CapI                                                       |                  |                |               |
| U19459-cds1_at    |        |        |         |         |         |        |              | U19459-cds1    | Gene:vat B;Product:VAT B;Note:acetyltransferase                              |                  |                |               |
| U31979-cds4_at    |        |        |         |         |         |        |              | U31979-cds4    | Gene:aroB;Product:5-dehydroquinate synthase;Note:5-dehydroquinate hydrolyase |                  |                |               |
| U35036-cds4_at    |        |        |         |         |         |        |              | U35036-cds4    | Gene:pre;Product:Pre protein                                                 |                  |                |               |
| U38429-cds3_at    |        |        |         |         |         |        |              | U38429-cds3    | Gene:pre;Product:recombination protein                                       |                  |                |               |
| U50077-cds2_x_at  |        |        |         |         |         |        |              | U50077-cds2    | Staphylococcus aureus strain=SA2. Gene:qacC'                                 |                  |                |               |
| U73025-cds1_at    |        |        |         |         |         |        |              | U73025-cds1    | Gene:;Product:unknown;Note:orfX                                              |                  |                |               |
| U73026-cds1_at    |        |        |         |         |         |        |              | U73026-cds1    | Gene:saI4;Product:Note streptothricine-acetyl-transferase                    |                  |                |               |
| U73027-cds1_at    |        |        |         |         |         |        |              | U73027-cds1    | Gene:;Product:unknown;Note:orfZ;pep                                          |                  |                |               |
| U81980-cds2_at    |        |        |         |         |         |        |              | U81980-cds2    | Gene:qac;Product:                                                            |                  |                |               |
| U82085-cds1_at    |        |        |         |         |         |        |              | U82085-cds1    | Gene:vgAB;Product:pristinamycin resistance protein VgAB                      |                  |                |               |
| U93688-cds10_at   |        |        |         |         |         |        |              | U93688-cds10   | Gene:;Product:Note:orf10                                                     |                  |                |               |
| U93688-cds12_at   |        |        |         |         |         |        |              | U93688-cds12   | Gene:;Product:Note:orf12                                                     |                  |                |               |
| WAN014HN5_at      |        |        |         |         |         |        |              | U93688-cds14   | Gene:;Product:Note:orf14                                                     |                  |                |               |
| U93688-cds15_at   |        |        |         |         |         |        |              | U93688-cds15   | Gene:;Product:orf15                                                          |                  |                |               |
| U93688-cds8_at    |        |        |         |         |         |        |              | U93688-cds8    | Gene:;Product:Note:orf8                                                      |                  |                |               |
| U93688-cds9_at    |        |        |         |         |         |        |              | U93688-cds9    | Gene:;Product:Note:orf9                                                      |                  |                |               |
| WAN014HMD_at      |        |        |         |         |         |        |              | U96609-cds1    | Gene:rep;Product:replication protein;Note:REP                                |                  |                |               |
| WAN014HME_at      |        |        |         |         |         |        |              | U96609-cds2    | Gene:;Product:Note:ORF64                                                     |                  |                |               |
| WAN014HMH_at      |        |        |         |         |         |        |              | X02166-cds1    | Gene:;Product:                                                               |                  |                |               |
| WAN014HMI_s_at    |        |        |         |         |         |        |              | X02166-cds4    | Gene:;Product:Note:pot. reading-frame A (aa 1-315)                           |                  |                |               |
| WAN014HMM_at      |        |        |         |         |         |        |              | X06627-cds1    | Gene:;Product:ORF (rx)                                                       |                  |                |               |
| WAN014HNB_at      |        |        |         |         |         |        |              | X12831-cds1    | Gene:;Product:Note:ORF 2 (AA 1 - 236)                                        |                  |                |               |
| WAN014HMW_at      |        |        |         |         |         |        |              | X59477-cds1    | Gene:mupirocin resistance gene                                               |                  |                |               |
| WAN014A7M-seg2_at |        |        |         |         |         |        |              |                |                                                                              |                  |                |               |
| WAN014A7O-seg2_at | SA2150 |        |         |         | SAV2160 | MW2086 |              |                |                                                                              |                  |                |               |
| WAN014A81-5_at    | SA0015 | SA0014 | SAR0015 | SAS0015 | SAV0015 | MW0015 | rplI         |                |                                                                              |                  |                |               |
| WAN014FRL_at      |        |        |         |         |         |        |              |                |                                                                              |                  |                |               |
| WAN014FRZ_at      |        |        |         |         |         |        |              |                |                                                                              |                  |                |               |
| WAN014FS4_at      |        |        |         |         |         |        |              |                |                                                                              |                  |                |               |
| WAN014FUK_at      |        | SAV085 |         |         |         |        |              |                |                                                                              |                  |                |               |
| WAN014FWO_at      |        |        |         |         |         |        |              |                |                                                                              |                  |                |               |
| WAN014G0E_at      |        |        |         |         |         |        |              |                |                                                                              |                  |                |               |
| WAN014G0I_at      |        |        |         |         |         |        |              |                |                                                                              |                  |                |               |
| WAN014G0J_at      |        |        |         |         |         |        |              |                |                                                                              |                  |                |               |
| WAN014GF2_at      |        |        |         |         |         |        |              |                |                                                                              |                  |                |               |
| WAN014GFJ_at      |        |        |         |         |         |        |              |                |                                                                              |                  |                |               |
| WAN014GFK_at      |        |        |         |         |         |        |              |                |                                                                              |                  |                |               |
| WAN014GGS5_at     |        |        |         |         |         |        |              |                |                                                                              |                  |                |               |
| WAN014GJX_at      |        |        |         |         |         |        |              |                |                                                                              |                  |                |               |
| WAN014GMK_at      |        |        |         |         |         |        |              |                |                                                                              |                  |                |               |
| WAN014GMM_at      |        |        |         |         |         |        |              |                |                                                                              |                  |                |               |
| WAN014GMN_at      |        |        |         |         |         |        |              |                |                                                                              |                  |                |               |
| WAN014GPE_at      |        |        |         |         |         |        |              |                |                                                                              |                  |                |               |
| WAN014GSD_at      |        |        |         |         |         |        |              |                |                                                                              |                  |                |               |
| WAN014GT2_at      |        |        |         |         |         |        |              |                |                                                                              |                  |                |               |
| WAN014GWJ_at      |        |        |         |         |         |        |              |                |                                                                              |                  |                |               |
| WAN014H0X_at      |        |        |         |         |         |        |              |                |                                                                              |                  |                |               |
| WAN014H0Y_at      |        |        |         |         |         |        |              |                |                                                                              |                  |                |               |
| WAN014HP4_at      |        |        |         |         |         |        |              |                |                                                                              |                  |                |               |
| WAN014HPV_at      |        |        |         |         |         |        |              |                |                                                                              |                  |                |               |
| WAN014HX2_at      |        |        |         |         |         |        |              |                |                                                                              |                  |                |               |
| WAN014HXR_at      |        |        |         |         |         |        |              |                |                                                                              |                  |                |               |
| WAN014HZ3_at      |        |        |         |         |         |        |              |                |                                                                              |                  |                |               |
| WAN014HZ6_at      |        |        |         |         |         |        |              |                |                                                                              |                  |                |               |
| WAN014HZ7_at      |        |        |         |         |         |        |              |                |                                                                              |                  |                |               |
| WAN014HZ8_at      |        |        |         |         |         |        |              |                |                                                                              |                  |                |               |
| WAN014HZ9_at      |        |        |         |         |         |        |              |                |                                                                              |                  |                |               |
| WAN014I7K-seg2_at | SA1472 |        |         |         | SAV1435 | MW1324 | ebh          |                |                                                                              |                  |                |               |
| WAN014ILF_at      |        |        |         |         |         |        |              |                |                                                                              |                  |                |               |
| WAN014ILY_x_at    |        |        |         |         |         |        |              |                |                                                                              |                  |                |               |
| WAN014INS_at      |        |        |         |         |         |        |              |                |                                                                              |                  |                |               |
| WAN014IOB_at      |        |        |         |         |         |        |              |                |                                                                              |                  |                |               |



| Systematic          | COL    | N315    | MRSA    | MSSA    | Mu50    | MW2    | GENE NAME | GenBank ID | GenBank Desc. | Protein Function                                                                     | TIGR Main Role                                                               | TIGR Sub Role                              |                                 |
|---------------------|--------|---------|---------|---------|---------|--------|-----------|------------|---------------|--------------------------------------------------------------------------------------|------------------------------------------------------------------------------|--------------------------------------------|---------------------------------|
| WANO14HXE_at        |        |         | SAR1892 |         |         |        |           |            |               | hyaluronate lyase precursor 1                                                        | Cellular processes                                                           | Pathogenesis                               |                                 |
| WANO14I7K-seg3_at   | SA1472 |         | SAR1447 |         | SAV1434 |        |           |            |               | pathogenicity protein, putative                                                      | Cellular processes                                                           | Pathogenesis                               |                                 |
| WANO14I7K-seg3_at   |        |         | SAR0845 |         |         |        |           |            |               | extracellular matrix and plasma binding protein                                      | Cellular processes                                                           | Pathogenesis                               |                                 |
| WANO14IP3_at        | SA1865 |         | SAR1902 |         |         |        |           |            |               | serine protease SPIE                                                                 | Cellular processes                                                           | Pathogenesis                               |                                 |
| WANO14IPH_at        |        |         | SAR2125 | SAS1943 |         | MW1962 |           |            |               | accessory gene regulator protein C                                                   | Cellular processes                                                           | Pathogenesis                               |                                 |
| WANO14IQ0_at        |        | SA1842  |         |         | SAV2036 |        |           |            |               | accessory gene regulator B                                                           | Cellular processes                                                           | Pathogenesis                               |                                 |
| WANO14IQ1_at        |        |         | SAR2123 | SAS1941 |         | MW1960 |           |            |               | accessory gene regulator protein B                                                   | Cellular processes                                                           | Pathogenesis                               |                                 |
| WANO14IAT_at        |        |         | SAR1525 | SAS0926 |         | MW1408 |           |            |               | virulence-associated protein E                                                       | Cellular processes                                                           | Pathogenesis                               |                                 |
| WANO14ITP_s_at      |        |         | SAR0114 |         |         |        |           |            |               | immunoglobulin G binding protein A precursor                                         | Cellular processes                                                           | Pathogenesis                               |                                 |
| WANO14IUU_at        | SA2194 |         |         |         |         |        |           |            |               | hyaluronate lyase                                                                    | Cellular processes                                                           | Pathogenesis                               |                                 |
| WANO14IUV_at        |        | SA2003  |         |         | SAV2202 |        |           |            |               | hyaluronate lyase precursor                                                          | Cellular processes                                                           | Pathogenesis                               |                                 |
| WANO14IWK_at        | SA0209 |         |         |         |         |        |           |            |               | coagulase                                                                            | Cellular processes                                                           | Pathogenesis                               |                                 |
| WANO14IWX_at        |        | SA0566  |         |         |         |        |           |            |               | AggR protein [imported]-related protein                                              | Cellular processes                                                           | Pathogenesis                               |                                 |
| WANO14IXB_at        | SA0895 |         |         |         |         |        |           |            |               | pathogenicity island, ORF16                                                          | Cellular processes                                                           | Pathogenesis                               |                                 |
| WANO14IXB_at        |        |         | SAR0114 | SAS0085 |         | MW0084 |           |            |               | immunoglobulin G binding protein A precursor                                         | Cellular processes                                                           | Pathogenesis                               |                                 |
| WANO14IXB_at        |        |         |         |         | SAV2038 |        |           |            |               | accessory gene regulator protein C                                                   | Cellular processes                                                           | Pathogenesis                               |                                 |
| WANO14CAZ2_at       |        | SA1843  |         | SAS1881 |         | MW1898 |           |            |               | bacteriophage phi PVL (specific_host:Staphylococcus aureus ATCC 49775) proviral DNA. | Cellular processes                                                           | Toxin production and resistance            |                                 |
| WANO14GLH_at        |        |         | SAR1916 |         | SAV1824 |        |           |            |               | AB009866-cds12                                                                       | Cellular processes                                                           | Toxin production and resistance            |                                 |
| WANO14HHY_at        |        |         | SAR0845 |         |         |        |           |            |               | AB010487-cds1                                                                        | Gene:seg2:Product:enterotoxin type Gv                                        | Cellular processes                         | Toxin production and resistance |
| WANO14HIS_at        |        |         | SAR0425 |         |         |        |           |            |               | AF094826-cds1                                                                        | Gene:set2:Product:exotoxin 2                                                 | Cellular processes                         | Toxin production and resistance |
| WANO14HIT_at        |        |         | SAR0427 |         |         |        |           |            |               | AF094826-cds2                                                                        | Gene:set3:Product:exotoxin 3                                                 | Cellular processes                         | Toxin production and resistance |
| WANO14INH_at        |        |         | SAR0429 |         |         |        |           |            |               | AF094826-cds4                                                                        | Gene:set5:Product:exotoxin 5                                                 | Cellular processes                         | Toxin production and resistance |
| WANO14INI_at        |        |         | SAR0431 |         |         |        |           |            |               | AF094826-cds5                                                                        | Gene:set4:Product:exotoxin 4                                                 | Cellular processes                         | Toxin production and resistance |
| WANO14INI_at        |        |         |         |         | SAV2011 |        |           |            |               | AF217235-cds4                                                                        | Gene:sen:Product:SEN                                                         | Cellular processes                         | Toxin production and resistance |
| WANO14IUS_1_s_at    |        | SA1648  |         |         |         |        |           |            |               | AF285760-cds1                                                                        | Gene:seo:Product:SEO                                                         | Cellular processes                         | Toxin production and resistance |
| WANO14CAT8_at       |        | SA1647  |         |         | SAV1829 |        |           |            |               | AF285760-cds2                                                                        | Gene:sem:Product:SEM                                                         | Cellular processes                         | Toxin production and resistance |
| WANO14HK3_at        |        | SA1645  | SAR1918 |         | SAV1827 |        |           |            |               | Gene:Yen1;Product:YENT1                                                              | Cellular processes                                                           | Toxin production and resistance            |                                 |
| WANO14HK4_at        |        | SA1644  |         |         |         |        |           |            |               | AF285760-cds4                                                                        | Gene:Yen2;Product:YENT2                                                      | Cellular processes                         | Toxin production and resistance |
| WANO14HK5_at        |        | SA1643  |         |         |         |        |           |            |               | AF285760-cds5                                                                        | Gene:sen:Product:SEN                                                         | Cellular processes                         | Toxin production and resistance |
| WANO14IRH_at        |        | SAV090  | SAR1917 |         | SAV0909 |        |           |            |               | Staphylococcus aureus subsp. aureus Mu50 GENE=="SAV0909"                             | Cellular processes                                                           | Toxin production and resistance            |                                 |
| WANO14IRH_at        |        |         |         |         |         |        |           |            |               | enterotoxin type A, putative                                                         | Cellular processes                                                           | Toxin production and resistance            |                                 |
| WANO14HGZ_at        | SA0907 |         |         |         |         |        |           |            |               | cell wall hydrolase                                                                  | Cellular processes                                                           | Toxin production and resistance            |                                 |
| WANO14HLT_at        |        | tetM    |         |         | SAV0398 |        |           |            |               | M11118-cds1                                                                          | Staphylococcus aureus (strain S6); Gene:Product:enterotoxin B.Note:precursor | Cellular processes                         | Toxin production and resistance |
| WANO14HMA_at        |        |         | SAS0051 |         |         | MW0051 |           |            |               | M21136-cds1                                                                          | Gene:Product:Note:tetM                                                       | Cellular processes                         | Toxin production and resistance |
| WANO14HMA_at        |        |         | SAS1097 |         | SAV1163 |        |           |            |               | U11702-cds1                                                                          | Gene:seh:Product:enterotoxin H.Note:staphylococcal enterotoxin H             | Cellular processes                         | Toxin production and resistance |
| WANO14HMA_at        |        |         |         |         |         |        |           |            |               | X5185-cds1                                                                           | Gene:Product:truncated alpha-toxin                                           | Cellular processes                         | Toxin production and resistance |
| WANO14H25_at        |        |         |         |         |         |        |           |            |               |                                                                                      | AlphA-Hemolysin precursor                                                    | Cellular processes                         | Toxin production and resistance |
| WANO14FS6_at        |        |         |         |         |         |        |           |            |               |                                                                                      | enterotoxin family protein                                                   | Cellular processes                         | Toxin production and resistance |
| WANO14FU6_at        |        |         | SAS0389 |         |         | MW0387 |           |            |               | exotoxin 2                                                                           | Cellular processes                                                           | Toxin production and resistance            |                                 |
| WANO14FUA_at        |        |         | SAS0396 |         |         | MW0394 |           |            |               | exotoxin 3                                                                           | Cellular processes                                                           | Toxin production and resistance            |                                 |
| WANO14FZO_at        |        |         | SAS2262 |         |         | MW2292 |           |            |               | macrolide efflux protein, putative                                                   | Cellular processes                                                           | Toxin production and resistance            |                                 |
| WANO14G21_at        | SA0052 | SA0382  |         |         | SAV0422 |        |           |            |               | exotoxin 6                                                                           | Cellular processes                                                           | Toxin production and resistance            |                                 |
| WANO14G16_at        |        |         |         |         |         |        |           |            |               | glycosyl transferase, group 1                                                        | Cellular processes                                                           | Toxin production and resistance            |                                 |
| WANO14GK5_at        |        | SA1761  |         |         |         |        |           |            |               |                                                                                      | Cellular processes                                                           | Toxin production and resistance            |                                 |
| WANO14GPB_at        | SA0061 | SA0080  |         | SAS0054 | SAV0084 | MW0054 |           |            |               | Domain of unknown function domain protein                                            | Cellular processes                                                           | Toxin production and resistance            |                                 |
| WANO14GTF_at        | SA0032 | SA0037  | SAR0038 |         | SAV0040 | MW0030 |           |            |               | MacC domain protein                                                                  | Cellular processes                                                           | Toxin production and resistance            |                                 |
| WANO14GHI_at        | SA0468 |         |         |         |         |        |           |            |               | exotoxin 3                                                                           | Cellular processes                                                           | Toxin production and resistance            |                                 |
| WANO14GW8_at        | SA0049 |         |         |         |         |        |           |            |               | Domain of unknown function domain protein                                            | Cellular processes                                                           | Toxin production and resistance            |                                 |
| WANO14GWE_at        |        |         |         | SAS0387 |         | MW0385 |           |            |               | exotoxin 2                                                                           | Cellular processes                                                           | Toxin production and resistance            |                                 |
| WANO14GWN_at        | SA0478 |         |         |         |         |        |           |            |               | exotoxin 3                                                                           | Cellular processes                                                           | Toxin production and resistance            |                                 |
| WANO14HO3_at        |        |         | SAR1139 |         |         |        |           |            |               | exotoxin 1, putative                                                                 | Cellular processes                                                           | Toxin production and resistance            |                                 |
| WANO14HO5_at        |        |         | SAR1140 |         |         |        |           |            |               | exotoxin 3, putative                                                                 | Cellular processes                                                           | Toxin production and resistance            |                                 |
| WANO14HOA_at        | SA1043 |         |         | SAS0971 |         | MW0919 |           |            |               | glycosyl transferase, group 1                                                        | Cellular processes                                                           | Toxin production and resistance            |                                 |
| WANO14HOY_at        |        |         | SAR0424 |         |         |        |           |            |               | exotoxin, putative                                                                   | Cellular processes                                                           | Toxin production and resistance            |                                 |
| WANO14HOZ_at        |        |         | SAR0435 |         |         |        |           |            |               | exotoxin 3, putative                                                                 | Cellular processes                                                           | Toxin production and resistance            |                                 |
| WANO14HSM_at        |        |         | SAR0690 |         |         |        |           |            |               | arsenical resistance operon repressor 1                                              | Cellular processes                                                           | Toxin production and resistance            |                                 |
| WANO14HVC_at        |        |         | SAR2108 |         |         |        |           |            |               | Aerolysin-like leukocidin family protein                                             | Cellular processes                                                           | Toxin production and resistance            |                                 |
| WANO14IMK_at        | SA0474 | SA0390  |         | SAS0393 | SAV0429 | MW0391 |           |            |               | exotoxin 4                                                                           | Cellular processes                                                           | Toxin production and resistance            |                                 |
| WANO14ITG_at        |        | SA0032  | SAR0032 |         | SAV0034 |        |           |            |               | bleomycin resistance protein                                                         | Cellular processes                                                           | Toxin production and resistance            |                                 |
| WANO14ITM_at        | SA0886 |         | SAS1921 |         |         | MW1938 |           |            |               | staphylococcal enterotoxin                                                           | Cellular processes                                                           | Toxin production and resistance            |                                 |
| WANO14ITN_at        | SA0887 |         | SAS1920 |         |         | MW1937 |           |            |               | staphylococcal extracellular enterotoxin type I                                      | Cellular processes                                                           | Toxin production and resistance            |                                 |
| WANO14IHT_at        |        |         |         |         |         |        |           |            |               | enterotoxin type c-2 precursor                                                       | Cellular processes                                                           | Toxin production and resistance            |                                 |
| WANO14ITRZ_at       |        | SA1817  |         |         |         |        |           |            |               | exotoxin 3, putative                                                                 | Cellular processes                                                           | Toxin production and resistance            |                                 |
| WANO14BUE4_at       |        |         | SAR1141 |         |         |        |           |            |               | enterotoxin                                                                          | Cellular processes                                                           | Toxin production and resistance            |                                 |
| WANO14BUE5_at       |        |         | SAR1920 |         |         |        |           |            |               | Multidrug resistance protein A                                                       | Cellular processes                                                           | Toxin production and resistance            |                                 |
| WANO14BUEX_at       |        |         | SAR2438 | SAS2244 | SAV2353 | MW2274 |           |            |               | Streptomycin 3-adenylyltransferase (AAD(9))                                          | Cellular processes                                                           | Toxin production and resistance            |                                 |
| WANO14CBER_s_at     | SA2385 | SAV091  | SAR1736 |         | SAV1656 |        |           |            |               | aminidase                                                                            | Cellular processes                                                           | Other                                      |                                 |
| WANO14C21_at        |        |         |         |         | SAV0913 |        |           |            |               | acetyltransferase, GNAT family                                                       | Central intermediary metabolism                                              | Other                                      |                                 |
| WANO14CSGL_s_at     |        |         |         |         | SAV027  |        |           |            |               | M18086-cds2                                                                          | Staphylococcus aureus subsp. aureus Mu50 Bacteria; GENE=="SAV0913"           | Staphylococcus aureus (strain SK982) DNA.  |                                 |
| WANO14G6Y_at        | SA0576 |         |         |         | SAV2213 |        |           |            |               | conserved hypothetical protein                                                       | conserved hypothetical protein                                               | conserved hypothetical protein             |                                 |
| WANO14G7W_at        | SA1635 |         |         |         | SAV1817 |        |           |            |               | conserved hypothetical protein                                                       | conserved hypothetical protein                                               | conserved hypothetical protein             |                                 |
| WANO14HUV_at        | SA1769 | SAR2055 |         |         | SAV1958 |        |           |            |               | conserved hypothetical protein                                                       | conserved hypothetical protein                                               | conserved hypothetical protein             |                                 |
| WANO14HX4_at        | SA1772 | SAR2059 |         |         | SAV1961 |        |           |            |               | conserved hypothetical protein                                                       | conserved hypothetical protein                                               | conserved hypothetical protein             |                                 |
| WANO14H4Z_at        |        | SA1779  | SAR2066 |         | SAV1968 |        |           |            |               | conserved hypothetical protein                                                       | conserved hypothetical protein                                               | conserved hypothetical protein             |                                 |
| WANO14I14_at        | SA0132 |         |         |         |         | MW0120 |           |            |               | replication initiation protein, degenerate                                           | Disrupted reading frame                                                      | Disrupted reading frame                    |                                 |
| WANO14IXT_at        | SA1813 |         |         |         |         |        |           |            |               | transposase, putative, degenerate                                                    | Disrupted reading frame                                                      | Disrupted reading frame                    |                                 |
| WANO14IXV_at        | SA1442 |         |         |         |         |        |           |            |               | putative restriction enzyme modulator protein                                        | DNA metabolism                                                               | Degradation of DNA                         |                                 |
| WANO14IHO_T         |        |         | SAR0088 |         |         |        |           |            |               | dnaC                                                                                 | DNA metabolism                                                               | DNA replication, recombination, and repair |                                 |
| WANO14G4F_at        |        |         |         |         | SAV0869 |        |           |            |               | Staphylococcus aureus subsp. aureus Mu50 GENE=="SAV0869"                             | DNA metabolism                                                               | DNA replication, recombination, and repair |                                 |
| WANO14IWC_at        |        | SAV000  |         |         | SAV001  |        |           |            |               | Staphylococcus aureus subsp. aureus GENE=="repA"                                     | DNA metabolism                                                               | DNA replication, recombination, and repair |                                 |
| WANO14GH1_at        |        |         |         |         | SAV034  |        | Human     |            |               | Staphylococcus aureus subsp. aureus GENE=="SAV034"                                   | DNA metabolism                                                               | DNA replication, recombination, and repair |                                 |
| WANO14FRF_at        | SA0042 |         |         |         |         |        |           |            |               | replication-associated protein                                                       | DNA metabolism                                                               | DNA replication, recombination, and repair |                                 |
| WANO14G20_at        |        | SAV078  |         |         | SAV0783 |        |           |            |               | cassette chromosome recombinase A1                                                   | DNA metabolism                                                               | DNA replication, recombination, and repair |                                 |
| WANO14G6V_s_at      |        | SA2010  |         |         | SAV2209 |        |           |            |               | phage integrase family domain protein                                                | DNA metabolism                                                               | DNA replication, recombination, and repair |                                 |
| WANO14H4K_at        | SA1573 |         |         |         |         |        |           |            |               | RNA-directed DNA polymerase                                                          | DNA metabolism                                                               | DNA replication, recombination, and repair |                                 |
| WANO14HLF_at        |        | SA0058  | SAR0060 |         | SAV0062 |        |           |            |               | integrase/recombinase, core domain family, authentic frameshift                      | DNA metabolism                                                               | DNA replication, recombination, and repair |                                 |
| WANO14HLG5_at       |        | SA0057  | SAR0059 |         | SAV0061 | MW0038 |           |            |               | site-specific recombinase                                                            | DNA metabolism                                                               | DNA replication, recombination, and repair |                                 |
| WANO14HNK_at        |        | SA0028  |         |         | SAV0029 |        |           |            |               | site-specific recombinase                                                            | DNA metabolism                                                               | DNA replication, recombination, and repair |                                 |
| WANO14HNK_at        |        | SA0029  | SAR0031 |         | SAV0031 |        |           |            |               | repB protein                                                                         | DNA metabolism                                                               | DNA replication, recombination, and repair |                                 |
| WANO14H20_at        |        | SA0027  |         |         | SAV0028 |        |           |            |               | Plasmid recombination enzyme (Mobilization protein)                                  | DNA metabolism                                                               | DNA replication, recombination, and repair |                                 |
| WANO14I13_at        | SA0041 |         |         |         |         |        |           |            |               | repB protein                                                                         | DNA metabolism                                                               | DNA replication, recombination, and repair |                                 |
| WANO14I12_at        | SA2141 |         |         |         |         |        |           |            |               | cassette chromosome recombinase B, authentic frameshift                              | DNA metabolism                                                               | DNA replication, recombination, and repair |                                 |
| WANO14ITE_at        |        |         | SAR1541 | SAS0909 |         | MW1425 |           |            |               | site-specific recombinase family protein, degenerate                                 | DNA metabolism                                                               | DNA replication, recombination, and repair |                                 |
| WANO14BQVZ_at       |        |         |         |         |         |        |           |            |               | DNA polymerase I, putative                                                           | DNA metabolism                                                               | DNA replication, recombination, and repair |                                 |
| WANO14BUTL_at       |        |         | SAR2460 |         | SAV2371 |        |           |            |               | replication initiation protein                                                       | DNA metabolism                                                               | DNA replication, recombination, and repair |                                 |
| WANO14CBG5_at       |        | SA2161  |         | SAS2263 | SAV2371 | MW2293 |           |            |               | attachment to host cells and virulence                                               | DNA metabolism                                                               | DNA replication, recombination, and repair |                                 |
| WANO14FS1_at        |        |         | SAS0025 |         |         |        |           |            |               | type I restriction-modification system restriction subunit                           | DNA metabolism                                                               | Restriction/modification                   |                                 |
| WANO14FSJL_at       |        |         | SAS0026 |         |         |        |           |            |               | putative type I restriction enzyme specificity protein                               | DNA metabolism                                                               | Restriction/modification                   |                                 |
| WANO14FSK_at        |        |         | SAS0027 |         |         |        |           |            |               | Type I restriction-modification system methyltransferase subunit                     | DNA metabolism                                                               | Restriction/modification                   |                                 |
| WANO14FU9_at        |        |         | SAS0395 |         |         |        |           |            |               | type I restriction-modification enzyme, S subunit, EcoA family                       | DNA metabolism                                                               | Restriction/modification                   |                                 |
| WANO14GWK_at        | SA0477 | SA0392  |         |         | SAV0432 |        |           |            |               | type I restriction-modification system, S subunit, EcoA family                       | DNA metabolism                                                               | Restriction/modification                   |                                 |
| WANO14GWM_at        |        |         | SAR0434 |         |         |        |           |            |               | type I restriction-modification enzyme, S subunit, EcoA family                       | DNA metabolism                                                               | Restriction/modification                   |                                 |
| WANO14HL1_at        |        | SA1625  |         |         | SAV1807 |        |           |            |               | type I RUM system specificity subunit                                                | DNA metabolism                                                               | Restriction/modification                   |                                 |
| WANO14HUB_at        |        |         | SAR1898 |         |         |        |           |            |               | type I restriction-modification enzyme, S subunit, EcoA family                       | DNA metabolism                                                               | Restriction/modification                   |                                 |
| WANO14CAIK_at       |        | SA1271  | SAR1450 | SAS1381 | SAV1438 | MW1327 |           |            |               | threonine dehydratase                                                                | Energy metabolism                                                            | Amino acids, peptides and amines           |                                 |
| WANO144LN-seg1_s_at |        |         | SAR1447 |         |         |        |           |            |               | very large surface anchored protein                                                  | Energy metabolism                                                            | Anaerobic                                  |                                 |
| WANO14HPS_at        |        |         | SAR0261 |         |         |        |           |            |               | nitric oxide reductase norZ, putative                                                | Energy metabolism                                                            | Anaerobic                                  |                                 |

| Systematic          | COL | N315   | MRSA    | MSSA    | Mu50    | MW2    | GENE    |                | GenBank Desc.                                                                        | Protein Function                       | TIGR Main Role                          | TIGR Sub Role |
|---------------------|-----|--------|---------|---------|---------|--------|---------|----------------|--------------------------------------------------------------------------------------|----------------------------------------|-----------------------------------------|---------------|
|                     |     |        |         |         |         |        | NAME    | GenBank ID     |                                                                                      |                                        |                                         |               |
| WAN014IQN_at        |     |        | SAR2490 |         |         |        |         |                | transcriptional regulator NiRr                                                       | Energy metabolism                      | Anaerobic                               |               |
| WAN014IQO_at        |     |        | SAR1826 |         |         |        |         |                | potential ATP-binding protein                                                        | Energy metabolism                      | Anaerobic                               |               |
| WAN01BUOQ-seg1_at   |     |        | SAR1447 |         |         |        |         |                | very large surface anchored protein                                                  | Energy metabolism                      | Anaerobic                               |               |
| WAN01BUOQ-seg6_s_at |     |        | SAR1447 |         |         |        |         |                | very large surface anchored protein                                                  | Energy metabolism                      | Anaerobic                               |               |
| WAN01BUUF_at        |     |        | SAR2488 | SAS2290 | SAV2399 | MW2321 | subunit |                | assimilatory nitrite reductase                                                       | Energy metabolism                      | Anaerobic                               |               |
| WAN01CB96_x_at      |     | SA2187 | SAR2488 | SAS2290 | SAV2399 | MW2321 | subunit |                | assimilatory nitrite reductase                                                       | Energy metabolism                      | Anaerobic                               |               |
| WAN014IOV-seg1_at   |     | SA1267 | SAR1447 |         | SAV1434 |        |         |                | ATP synthase, Delta/Epsilon chain, long alpha-helix domain, putative                 | Energy metabolism                      | ATP-proton motive force interconversion |               |
| WAN014IOV-seg2_at   |     | SA1267 | SAR1447 |         | SAV1434 | MW1324 |         |                | ATP synthase, Delta/Epsilon chain, long alpha-helix domain, putative                 | Energy metabolism                      | ATP-proton motive force interconversion |               |
| WAN014IOX-seg3_at   |     | SA1267 | SAR1447 |         | SAV1434 | MW1324 |         |                | ATP synthase, Delta/Epsilon chain, long alpha-helix domain, putative                 | Energy metabolism                      | ATP-proton motive force interconversion |               |
| WAN014IUB_at        |     |        | SAR1561 | SAS0892 |         | MW1441 |         |                | Na/K ATPase, putative                                                                | Energy metabolism                      | ATP-proton motive force interconversion |               |
| WAN01BUOQ-seg3_at   |     |        | SAR1447 |         | SAV1434 |        |         |                | ATP synthase, Delta/Epsilon chain, long alpha-helix domain, putative                 | Energy metabolism                      | ATP-proton motive force interconversion |               |
| WAN01BUOQ-seg4_at   |     |        | SAR1447 |         | SAV1434 | MW1324 |         |                | ATP synthase, Delta/Epsilon chain, long alpha-helix domain, putative                 | Energy metabolism                      | ATP-proton motive force interconversion |               |
| WAN014HL6_e_at      |     | SA0077 | SAR0079 |         | SAV0081 |        |         |                | Protein kinase domain protein                                                        | Energy metabolism                      | Glycolysis/gluconeogenesis              |               |
| WAN014HRX_at        |     |        | SAR1587 |         |         |        |         |                | PKb family carbohydrate kinase                                                       | Energy metabolism                      | Sugars                                  |               |
| WAN014GZQ_at        |     |        | SAR2559 | SAS2363 |         | MW2396 | fabG    |                | 3-oxoacyl-(acyl carrier protein) reductase, authentic point mutation                 | Fatty acid and phospholipid metabolism | Biosynthesis                            |               |
| WAN014GSU_at        |     | SA0031 | SA0036  |         | SAV0039 | MW0029 |         |                | glycerophosphoryl diester phosphodiesterase, putative                                | Fatty acid and phospholipid metabolism | Degradation                             |               |
| WAN014HXZ_at        |     |        | SAR2592 |         |         |        |         |                | fatty acid desaturase family protein, putative                                       | Fatty acid and phospholipid metabolism | Other                                   |               |
| WAN014GLI_at        |     |        |         |         |         |        |         |                | conserved hypothetical protein                                                       | Hypothetical proteins                  | Conserved                               |               |
| WAN014HFR_at        |     |        |         | SAS1882 |         | MW1899 |         | AB009866-cds11 | bacteriophage phi PVL (specific_host:Staphylococcus aureus ATCC 49775) proviral DNA, | conserved hypothetical protein         | Conserved                               |               |
| AB009866-cds37_x_at |     |        |         |         |         |        |         | AB009866-cds35 | bacteriophage phi PVL (specific_host:Staphylococcus aureus ATCC 49775) proviral DNA, | conserved hypothetical protein         | Conserved                               |               |
| AB009866-cds56_at   |     |        | SAR1546 |         |         | MW1430 |         | AB009866-cds37 | bacteriophage phi PVL (specific_host:Staphylococcus aureus ATCC 49775) proviral DNA, | conserved hypothetical protein         | Conserved                               |               |
| AB009866-cds56_at   |     |        |         | SAS1898 |         | MW1915 |         | AB009866-cds56 | bacteriophage phi PVL (specific_host:Staphylococcus aureus ATCC 49775) proviral DNA, | conserved hypothetical protein         | Conserved                               |               |
| WAN014HHN_at        |     |        |         | SAS1897 |         | MW1914 |         | AB009866-cds57 | bacteriophage phi PVL (specific_host:Staphylococcus aureus ATCC 49775) proviral DNA, | conserved hypothetical protein         | Conserved                               |               |
| WAN014GZC_at        |     | SA0058 | SA0078  |         | SAV0082 |        |         | AB014440-cds4  | Staphylococcus aureus (strain NCTC825) DNA,                                          | conserved hypothetical protein         | Conserved                               |               |
| AB037671-cds30_at   |     |        | SAR0042 |         |         |        |         | AB037671-cds30 | Staphylococcus aureus (strain:85/2082) DNA,                                          | conserved hypothetical protein         | Conserved                               |               |
| WAN014HHB_at        |     |        | SAR0086 |         |         |        |         | AB047239-cds1  | Staphylococcus aureus (strain:ATCC25923) DNA,                                        | conserved hypothetical protein         | Conserved                               |               |
| WAN014HHF_at        |     |        | SAR0080 |         |         |        |         | AB047239-cds4  | Staphylococcus aureus (strain:ATCC25923) DNA,                                        | conserved hypothetical protein         | Conserved                               |               |
| AF217235-cds11_at   |     |        |         |         | SAV2019 |        |         | AF217235-cds11 | Gene:Product:Orf11                                                                   | conserved hypothetical protein         | Conserved                               |               |
| WAN014HJL_at        |     |        | SAR0372 |         |         |        |         | AF217235-cds17 | Gene:Product:Orf17                                                                   | conserved hypothetical protein         | Conserved                               |               |
| WAN014INK_at        |     |        | SAR0380 |         |         |        |         | AF217235-cds7  | Gene:Product:Orf7                                                                    | conserved hypothetical protein         | Conserved                               |               |
| WAN014GQG_at        |     | SA0285 | SA0285  |         | SAR0292 |        |         | AJ271970-cds2  | Gene:Product:hypothetical protein>Note:ORFB                                          | conserved hypothetical protein         | Conserved                               |               |
| WAN014G3V_at        |     |        |         |         | SAV0297 |        |         | SAV0785        | Staphylococcus aureus subsp. aureus Mu50 GENE=="SAV0785"                             | conserved hypothetical protein         | Conserved                               |               |
| WAN014HCR_at        |     |        | SAR0383 |         | SAV0801 |        |         | SAV0801        | Staphylococcus aureus subsp. aureus Mu50 GENE=="SAV0801"                             | conserved hypothetical protein         | Conserved                               |               |
| WAN014G4I_at        |     |        |         |         | SAV0802 |        |         | SAV0802        | Staphylococcus aureus subsp. aureus Mu50 GENE=="SAV0802"                             | conserved hypothetical protein         | Conserved                               |               |
| WAN014GDD_at        |     |        |         |         | SAV0857 |        |         | SAV0857        | Staphylococcus aureus subsp. aureus Mu50 GENE=="SAV0857"                             | conserved hypothetical protein         | Conserved                               |               |
| WAN014IS6_at        |     |        | SAV085  |         | SAV0859 |        |         | SAV0859        | Staphylococcus aureus subsp. aureus Mu50 GENE=="SAV0859"                             | conserved hypothetical protein         | Conserved                               |               |
| WAN014IRU_at        |     |        | SAV088  |         | SAV0889 |        |         | SAV0889        | Staphylococcus aureus subsp. aureus Mu50 GENE=="SAV0889"                             | conserved hypothetical protein         | Conserved                               |               |
| WAN014IRC_at        |     |        | SAV089  |         | SAV0899 |        |         | SAV0899        | Staphylococcus aureus subsp. aureus Mu50 GENE=="SAV0899"                             | conserved hypothetical protein         | Conserved                               |               |
| WAN014G4I_at        |     |        |         |         | SAV0916 |        |         | SAV0916        | Staphylococcus aureus subsp. aureus Mu50 GENE=="SAV0916"                             | conserved hypothetical protein         | Conserved                               |               |
| WAN014G84_at        |     |        |         |         | SAV1999 |        |         | SAV1999        | Staphylococcus aureus subsp. aureus Mu50 GENE=="SAV1999"                             | conserved hypothetical protein         | Conserved                               |               |
| WAN014GGS_at        |     |        |         |         | SAV002  |        |         | SAV002         | Staphylococcus aureus subsp. aureus Mu50 GENE=="SAV002"                              | conserved hypothetical protein         | Conserved                               |               |
| WAN014GGV_at        |     |        |         |         | SAV010  |        |         | SAV010         | Staphylococcus aureus subsp. aureus Mu50 GENE=="SAV010"                              | conserved hypothetical protein         | Conserved                               |               |
| WAN014Q1_at         |     | SAVP01 |         |         | SAV018  |        |         | SAV018         | Staphylococcus aureus subsp. aureus Mu50 GENE=="SAV018"                              | conserved hypothetical protein         | Conserved                               |               |
| WAN014R62_at        |     |        |         | SAS0378 | SAV019  | MW0376 |         | SAV019         | Staphylococcus aureus subsp. aureus MW2 GENE=="MW0376"                               | conserved hypothetical protein         | Conserved                               |               |
| WAN014IQ6_at        |     |        |         |         | SAV019  |        |         | SAV019         | Staphylococcus aureus plasmid pSK41                                                  | conserved hypothetical protein         | Conserved                               |               |
| WAN014IQ9_at        |     |        |         |         | SAV015  |        |         | SAV015         | Staphylococcus aureus plasmid pSK41                                                  | conserved hypothetical protein         | Conserved                               |               |
| WAN014IQ8_at        |     |        |         |         | SAV016  |        |         | SAV016         | Staphylococcus aureus plasmid pSK41                                                  | conserved hypothetical protein         | Conserved                               |               |
| WAN014IQ5_at        |     |        |         |         | SAV022  |        |         | SAV022         | Staphylococcus aureus plasmid pSK41                                                  | conserved hypothetical protein         | Conserved                               |               |
| WAN014FRV_at        |     |        |         | SAS0037 |         |        |         | SAV022         | Staphylococcus aureus plasmid pSK41                                                  | conserved hypothetical protein         | Conserved                               |               |
| WAN014FRX_at        |     |        |         | SAS0038 |         |        |         | SAV022         | Staphylococcus aureus plasmid pSK41                                                  | conserved hypothetical protein         | Conserved                               |               |
| WAN014FS3_at        |     |        |         | SAS0044 |         |        |         | SAV022         | Staphylococcus aureus plasmid pSK41                                                  | conserved hypothetical protein         | Conserved                               |               |
| WAN014FS5_at        |     |        |         | SAS0047 |         |        |         | SAV022         | Staphylococcus aureus plasmid pSK41                                                  | conserved hypothetical protein         | Conserved                               |               |
| WAN014FS6_at        |     |        |         | SAS0074 |         |        |         | SAV022         | Staphylococcus aureus plasmid pSK41                                                  | conserved hypothetical protein         | Conserved                               |               |
| WAN014GSQ_at        |     |        |         | SAS0075 |         | MW0074 |         | SAV022         | Staphylococcus aureus plasmid pSK41                                                  | conserved hypothetical protein         | Conserved                               |               |
| WAN014FSD_at        |     |        |         | SAS0076 |         | MW0075 |         | SAV022         | Staphylococcus aureus plasmid pSK41                                                  | conserved hypothetical protein         | Conserved                               |               |
| WAN014FSE_at        |     |        |         | SAS0077 |         | MW0076 |         | SAV022         | Staphylococcus aureus plasmid pSK41                                                  | conserved hypothetical protein         | Conserved                               |               |
| WAN014FSM_at        |     |        |         |         |         |        |         | SAV022         | Staphylococcus aureus plasmid pSK41                                                  | conserved hypothetical protein         | Conserved                               |               |
| WAN014FSQ_at        |     |        |         | SAS0036 |         |        |         | SAV022         | Staphylococcus aureus plasmid pSK41                                                  | conserved hypothetical protein         | Conserved                               |               |
| WAN014FTT_at        |     | SA0194 |         | SAS0175 | SAV0200 | MW0175 |         | SAV022         | Staphylococcus aureus plasmid pSK41                                                  | conserved hypothetical protein         | Conserved                               |               |
| WAN014FUV_at        |     |        |         | SAS1089 |         | MW1038 |         | SAV022         | Staphylococcus aureus plasmid pSK41                                                  | conserved hypothetical protein         | Conserved                               |               |
| WAN014FWW_at        |     |        |         | SAS0931 |         | MW1402 |         | SAV022         | Staphylococcus aureus plasmid pSK41                                                  | conserved hypothetical protein         | Conserved                               |               |
| WAN014FY2_at        |     |        |         |         |         |        |         | SAV022         | Staphylococcus aureus plasmid pSK41                                                  | conserved hypothetical protein         | Conserved                               |               |
| WAN014G1D_at        |     |        |         |         | SAV0404 |        |         | SAV022         | Staphylococcus aureus plasmid pSK41                                                  | conserved hypothetical protein         | Conserved                               |               |
| WAN014G1G_at        |     | SA2465 |         | SAS2349 | SAV2457 | MW2381 |         | SAV022         | Staphylococcus aureus plasmid pSK41                                                  | conserved hypothetical protein         | Conserved                               |               |
| WAN014G1H_at        |     |        |         |         | SAV0406 |        |         | SAV022         | Staphylococcus aureus plasmid pSK41                                                  | conserved hypothetical protein         | Conserved                               |               |
| WAN014G1N_at        |     |        |         |         | SAV0414 |        |         | SAV022         | Staphylococcus aureus plasmid pSK41                                                  | conserved hypothetical protein         | Conserved                               |               |
| WAN014G21_at        |     |        |         |         | SAV0784 |        |         | SAV022         | Staphylococcus aureus plasmid pSK41                                                  | conserved hypothetical protein         | Conserved                               |               |
| WAN014G3X_x_at      |     |        |         |         | SAV0788 |        |         | SAV022         | Staphylococcus aureus plasmid pSK41                                                  | conserved hypothetical protein         | Conserved                               |               |
| WAN014G5O_at        |     | SA0440 | SA0355  | SAS0344 | SAV0368 | MW0344 |         | SAV022         | Staphylococcus aureus plasmid pSK41                                                  | conserved hypothetical protein         | Conserved                               |               |
| WAN014G61_at        |     |        | SAV198  |         | SAV1989 |        |         | SAV022         | Staphylococcus aureus plasmid pSK41                                                  | conserved hypothetical protein         | Conserved                               |               |
| WAN014G63_at        |     |        | SA1828  | SAR0375 | SAV2021 |        |         | SAV022         | Staphylococcus aureus plasmid pSK41                                                  | conserved hypothetical protein         | Conserved                               |               |
| WAN014G66_at        |     |        | SA1829  |         | SAV2022 |        |         | SAV022         | Staphylococcus aureus plasmid pSK41                                                  | conserved hypothetical protein         | Conserved                               |               |
| WAN014G6W_at        |     |        | SA2011  |         | SAV2210 |        |         | SAV022         | Staphylococcus aureus plasmid pSK41                                                  | conserved hypothetical protein         | Conserved                               |               |
| WAN014G6X_at        |     |        | SA2012  |         | SAV2211 |        |         | SAV022         | Staphylococcus aureus plasmid pSK41                                                  | conserved hypothetical protein         | Conserved                               |               |
| WAN014G7X_at        |     |        | SA1636  |         | SAV1818 |        |         | SAV022         | Staphylococcus aureus plasmid pSK41                                                  | conserved hypothetical protein         | Conserved                               |               |
| WAN014G87_at        |     |        | SA1834  |         | SAV2027 |        |         | SAV022         | Staphylococcus aureus plasmid pSK41                                                  | conserved hypothetical protein         | Conserved                               |               |
| WAN014G81_at        |     |        | SA2015  |         | SAV2216 |        |         | SAV022         | Staphylococcus aureus plasmid pSK41                                                  | conserved hypothetical protein         | Conserved                               |               |
| WAN014G9K_at        |     |        | SA0190  | SAS0171 | SAV0196 | MW0170 |         | SAV022         | Staphylococcus aureus plasmid pSK41                                                  | conserved hypothetical protein         | Conserved                               |               |
| WAN014G9L_at        |     |        | SAV039  |         | SAV0395 |        |         | SAV022         | Staphylococcus aureus plasmid pSK41                                                  | conserved hypothetical protein         | Conserved                               |               |
| WAN014G96_at        |     |        | SA0196  | SAS0177 | SAV0202 | MW0177 |         | SAV022         | Staphylococcus aureus plasmid pSK41                                                  | conserved hypothetical protein         | Conserved                               |               |
| WAN014G99_at        |     |        | SAV040  |         | SAV0407 |        |         | SAV022         | Staphylococcus aureus plasmid pSK41                                                  | conserved hypothetical protein         | Conserved                               |               |
| WAN014GAA_at        |     |        | SAV041  |         | SAV0410 |        |         | SAV022         | Staphylococcus aureus plasmid pSK41                                                  | conserved hypothetical protein         | Conserved                               |               |
| WAN014G87_at        |     |        | SAV084  |         | SAV0849 |        |         | SAV022         | Staphylococcus aureus plasmid pSK41                                                  | conserved hypothetical protein         | Conserved                               |               |
| WAN014GB2_at        |     |        | SAV085  |         | SAV0854 |        |         | SAV022         | Staphylococcus aureus plasmid pSK41                                                  | conserved hypothetical protein         | Conserved                               |               |
| WAN014GFH_at        |     |        | SA2000  |         | SAV2199 |        |         | SAV022         | Staphylococcus aureus plasmid pSK41                                                  | conserved hypothetical protein         | Conserved                               |               |
| WAN014GGE_at        |     | SA0047 |         |         |         |        |         | SAV022         | Staphylococcus aureus plasmid pSK41                                                  | conserved hypothetical protein         | Conserved                               |               |
| WAN014GGY_x_at      |     |        |         |         | SAV021  |        |         | SAV022         | Staphylococcus aureus plasmid pSK41                                                  | conserved hypothetical protein         | Conserved                               |               |
| WAN014GJU_at        |     | SA0053 |         |         |         |        |         | SAV022         | Staphylococcus aureus plasmid pSK41                                                  | conserved hypothetical protein         | Conserved                               |               |
| WAN014GK6_at        |     |        | SA1787  | SAR1538 | SAS0912 | MW1422 |         | SAV022         | Staphylococcus aureus plasmid pSK41                                                  | conserved hypothetical protein         | Conserved                               |               |
| WAN014GKH_at        |     |        | SA1809  |         |         |        |         | SAV022         | Staphylococcus aureus plasmid pSK41                                                  | conserved hypothetical protein         | Conserved                               |               |
| WAN014GOL_at        |     | SA0287 |         |         |         |        |         | SAV022         | Staphylococcus aureus plasmid pSK41                                                  | conserved hypothetical protein         | Conserved                               |               |
| WAN014GQ4_at        |     | SA0062 | SA0081  | SAS0055 | SAV0085 | MW0055 |         | SAV022         | Staphylococcus aureus plasmid pSK41                                                  | conserved hypothetical protein         | Conserved                               |               |
| WAN014GQP_at        |     | SA0026 | SA0024  |         |         |        |         | SAV022         | Staphylococcus aureus plasmid pSK41                                                  | conserved hypothetical protein         | Conserved                               |               |
| WAN014GQZ_at        |     | SA0340 |         |         | SAV0866 |        |         | SAV022         | Staphylococcus aureus plasmid pSK41                                                  | conserved hypothetical protein         | Conserved                               |               |
| WAN014GR5_at        |     | SA0027 | SA0025  | SAR0026 | SAV0026 | MW0026 |         | SAV022         | Staphylococcus aureus plasmid pSK41                                                  | conserved hypothetical protein         | Conserved                               |               |
| WAN014GRG_s_at      |     | SA0350 |         |         |         |        |         | SAV022         | Staphylococcus aureus plasmid pSK41                                                  | conserved hypothetical protein         | Conserved                               |               |
| WAN014GS6_at        |     | SA0071 |         | SAS0063 |         | MW0063 |         | SAV022         | Staphylococcus aureus plasmid pSK41                                                  | conserved hypothetical protein         | Conserved                               |               |
| WAN014GSV_at        |     | SA0073 |         | SAS0065 |         | MW0065 |         | SAV022         | Staphylococcus aureus plasmid pSK41                                                  | conserved hypothetical protein         | Conserved                               |               |
| WAN014GV7_at        |     | SA0045 |         |         |         |        |         | SAV022         | Staphylococcus aureus plasmid pSK41                                                  | conserved hypothetical protein         | Conserved                               |               |
| WAN014GVN_at        |     | SA0048 |         |         |         |        |         | SAV022         | Staphylococcus aureus plasmid pSK41                                                  | conserved hypothetical protein         | Conserved                               |               |
| WAN014GX4_s_at      |     | SA0063 | SA0406  | SAS0404 | SAV0446 | MW0402 |         | SAV022         | Staphylococcus aureus plasmid pSK41                                                  | conserved hypothetical protein         | Conserved                               |               |
| WAN014GZX_at        |     | SA0063 | SA0082  | SAS0056 | SAV0086 | MW0056 |         | SAV022         | Staphylococcus aureus plasmid pSK41                                                  | conserved hypothetical protein         | Conserved                               |               |
| WAN014H16_at        |     | SA0065 |         |         |         |        |         |                |                                                                                      |                                        |                                         |               |

| Systematic     | COL    | N315   | MRSA    | MSSA     | Mu50    | MW2    | GENE |  | GenBank ID | GenBank Desc.                                      | Protein Function      | TIGR Main Role | TIGR Sub Role |
|----------------|--------|--------|---------|----------|---------|--------|------|--|------------|----------------------------------------------------|-----------------------|----------------|---------------|
|                |        |        |         |          |         |        | NAME |  |            |                                                    |                       |                |               |
| WAN014H2J_at   |        | SA1320 |         |          | SAV1489 |        |      |  |            | conserved hypothetical protein                     | Hypothetical proteins | Conserved      |               |
| WAN014H4O_at   | SA1574 |        |         |          |         |        |      |  |            | conserved hypothetical protein                     | Hypothetical proteins | Conserved      |               |
| WAN014H4I_at   | SA1577 |        | SAR1291 |          |         |        |      |  |            | conserved hypothetical protein                     | Hypothetical proteins | Conserved      |               |
| WAN014H4W_at   | SA0643 |        |         | SAS0555  |         | MW0551 |      |  |            | conserved hypothetical protein                     | Hypothetical proteins | Conserved      |               |
| WAN014H4X_at   | SA1579 |        | SAR1293 |          |         |        |      |  |            | conserved hypothetical protein                     | Hypothetical proteins | Conserved      |               |
| WAN014H4Y_at   |        | SA0553 |         |          | SAV0596 |        |      |  |            | conserved hypothetical protein                     | Hypothetical proteins | Conserved      |               |
| WAN014H5O_at   | SA0644 |        |         | SAS0556  |         | MW0552 |      |  |            | conserved hypothetical protein                     | Hypothetical proteins | Conserved      |               |
| WAN014H5C_at   | SA0645 |        |         | SAS0557  |         | MW0553 |      |  |            | conserved hypothetical protein                     | Hypothetical proteins | Conserved      |               |
| WAN014H53_at   | SA1581 |        | SAR1295 |          |         |        |      |  |            | conserved hypothetical protein                     | Hypothetical proteins | Conserved      |               |
| WAN014H54_at   | SA0646 |        |         | SAS0558  |         | MW0554 |      |  |            | conserved hypothetical protein                     | Hypothetical proteins | Conserved      |               |
| WAN014H55_at   | SA1582 |        | SAR1296 |          |         |        |      |  |            | conserved hypothetical protein                     | Hypothetical proteins | Conserved      |               |
| WAN014H57_at   | SA1583 |        | SAR1297 |          |         |        |      |  |            | conserved hypothetical protein                     | Hypothetical proteins | Conserved      |               |
| WAN014H5C_at   | SA0649 |        |         | SA0554   |         |        |      |  |            | conserved hypothetical protein                     | Hypothetical proteins | Conserved      |               |
| WAN014H5D_at   | SA1585 |        | SAR1299 |          |         |        |      |  |            | conserved hypothetical protein                     | Hypothetical proteins | Conserved      |               |
| WAN014H5E_at   | SA0650 |        |         | SAS0563  |         | MW0558 |      |  |            | conserved hypothetical protein                     | Hypothetical proteins | Conserved      |               |
| WAN014H5F_at   | SA1586 |        | SAR1300 |          |         |        |      |  |            | conserved hypothetical protein                     | Hypothetical proteins | Conserved      |               |
| WAN014H5G_at   | SA0651 |        |         | SAS0564  |         | MW0559 |      |  |            | conserved hypothetical protein                     | Hypothetical proteins | Conserved      |               |
| WAN014H5I_at   | SA0652 |        |         | SAS0565  |         | MW0560 |      |  |            | conserved hypothetical protein                     | Hypothetical proteins | Conserved      |               |
| WAN014H5K_at   | SA0653 |        | SAR0603 |          | SAS0566 | MW0561 |      |  |            | conserved hypothetical protein                     | Hypothetical proteins | Conserved      |               |
| WAN014H5M_at   | SA0654 |        |         | SAS0567  |         | MW0562 |      |  |            | conserved hypothetical protein                     | Hypothetical proteins | Conserved      |               |
| WAN014HL8_at   |        | SA0076 | SAR0078 |          | SAV0080 |        |      |  |            | conserved hypothetical protein                     | Hypothetical proteins | Conserved      |               |
| WAN014HO5_at   |        |        | SAR0365 |          |         |        |      |  |            | conserved hypothetical protein                     | Hypothetical proteins | Conserved      |               |
| WAN014HOR_at   |        |        | SAR0084 |          |         |        |      |  |            | conserved hypothetical protein                     | Hypothetical proteins | Conserved      |               |
| WAN014HOU_at   |        |        | SAR0090 |          |         |        |      |  |            | conserved hypothetical protein                     | Hypothetical proteins | Conserved      |               |
| WAN014HP6_at   |        |        | SAR0715 |          |         |        |      |  |            | conserved hypothetical protein                     | Hypothetical proteins | Conserved      |               |
| WAN014HPW_at   |        |        | SAR0285 |          |         |        |      |  |            | conserved hypothetical protein                     | Hypothetical proteins | Conserved      |               |
| WAN014HPX_at   |        |        | SAR1134 |          |         |        |      |  |            | conserved hypothetical protein                     | Hypothetical proteins | Conserved      |               |
| WAN014HPY_at   |        |        | SAR0286 |          |         |        |      |  |            | conserved hypothetical protein                     | Hypothetical proteins | Conserved      |               |
| WAN014HPZ_at   |        |        | SAR0287 |          |         |        |      |  |            | conserved hypothetical protein                     | Hypothetical proteins | Conserved      |               |
| WAN014HQ4_at   |        |        | SAR0289 |          |         |        |      |  |            | conserved hypothetical protein                     | Hypothetical proteins | Conserved      |               |
| WAN014HO6_at   |        |        | SAR0290 |          |         |        |      |  |            | conserved hypothetical protein                     | Hypothetical proteins | Conserved      |               |
| WAN014HQO_at   |        |        | SAR0379 |          |         |        |      |  |            | conserved hypothetical protein                     | Hypothetical proteins | Conserved      |               |
| WAN014HQS_at   |        |        | SAR0384 |          |         |        |      |  |            | conserved hypothetical protein                     | Hypothetical proteins | Conserved      |               |
| WAN014HTW_at   |        |        | SAR1884 |          |         |        |      |  |            | conserved hypothetical protein                     | Hypothetical proteins | Conserved      |               |
| WAN014HU7_at   |        |        | SAR1897 |          |         |        |      |  |            | conserved hypothetical protein                     | Hypothetical proteins | Conserved      |               |
| WAN014HUG_at   |        |        | SAR0963 |          |         |        |      |  |            | conserved hypothetical protein                     | Hypothetical proteins | Conserved      |               |
| WAN014HUT_at   |        | SA1767 | SAR2052 |          | SAV1956 |        |      |  |            | conserved hypothetical protein                     | Hypothetical proteins | Conserved      |               |
| WAN014HV4_at   |        | SA1778 | SAR2065 |          | SAV1967 |        |      |  |            | conserved hypothetical protein                     | Hypothetical proteins | Conserved      |               |
| WAN014HV9_at   |        |        | SAR2075 |          |         |        |      |  |            | conserved hypothetical protein                     | Hypothetical proteins | Conserved      |               |
| WAN014HVF_at   |        |        | SAR2113 |          |         |        |      |  |            | conserved hypothetical protein                     | Hypothetical proteins | Conserved      |               |
| WAN014HWD_at   |        |        | SAR1306 |          |         |        |      |  |            | conserved hypothetical protein                     | Hypothetical proteins | Conserved      |               |
| WAN014HWE_at   |        |        | SAR1311 |          |         |        |      |  |            | conserved hypothetical protein                     | Hypothetical proteins | Conserved      |               |
| WAN014HXG_at   |        |        | SAR1896 |          |         |        |      |  |            | conserved hypothetical protein                     | Hypothetical proteins | Conserved      |               |
| WAN014HXI_at   |        |        | SAR1909 |          |         |        |      |  |            | conserved hypothetical protein                     | Hypothetical proteins | Conserved      |               |
| WAN014HXK_at   |        |        | SAR1913 |          |         |        |      |  |            | conserved hypothetical protein                     | Hypothetical proteins | Conserved      |               |
| WAN014HXL_at   |        |        |         |          | SAV1823 |        |      |  |            | conserved hypothetical protein                     | Hypothetical proteins | Conserved      |               |
| WAN014I23_at   | SA2143 | SA1957 | SAR2240 | SAS2053  | SAV2152 | MW2078 |      |  |            | conserved hypothetical protein                     | Hypothetical proteins | Conserved      |               |
| WAN014I4O_at   | SA2196 | SA2005 | SAR2294 |          | SAV2204 |        |      |  |            | conserved hypothetical protein                     | Hypothetical proteins | Conserved      |               |
| WAN014I56_at   | SA2205 |        |         |          |         |        |      |  |            | conserved hypothetical protein, degenerate         | Hypothetical proteins | Conserved      |               |
| WAN014ILA_at   | SA2379 |        | SAR2469 |          |         |        |      |  |            | conserved hypothetical protein                     | Hypothetical proteins | Conserved      |               |
| WAN014ILX_at   | SA0289 |        |         |          |         |        |      |  |            | conserved hypothetical protein                     | Hypothetical proteins | Conserved      |               |
| WAN014IMS_x_at | SA0358 |        |         |          |         |        |      |  |            | conserved hypothetical protein                     | Hypothetical proteins | Conserved      |               |
| WAN014IMR_x_at |        |        |         |          |         | MW0401 |      |  |            | conserved hypothetical protein                     | Hypothetical proteins | Conserved      |               |
| WAN014IMS_at   | SA0069 |        |         | SAS0061  |         | MW0061 |      |  |            | conserved hypothetical protein                     | Hypothetical proteins | Conserved      |               |
| WAN014IO8_at   |        |        | SAR1314 |          |         |        |      |  |            | conserved hypothetical protein                     | Hypothetical proteins | Conserved      |               |
| WAN014IOC_at   |        |        | SAR2470 | SAS2273  | SAV2383 | MW2303 |      |  |            | conserved hypothetical protein                     | Hypothetical proteins | Conserved      |               |
| WAN014IOI_at   |        |        | SAR2568 |          |         |        |      |  |            | conserved hypothetical protein                     | Hypothetical proteins | Conserved      |               |
| WAN014IOQ_x_at |        | SA0364 |         |          |         |        |      |  |            | conserved hypothetical protein                     | Hypothetical proteins | Conserved      |               |
| WAN014IOU_at   | SA1827 |        | SAR0376 |          | SAV0379 |        |      |  |            | conserved hypothetical protein                     | Hypothetical proteins | Conserved      |               |
| WAN014IOV_at   | SA2259 |        |         |          | SAV2020 |        |      |  |            | conserved hypothetical protein                     | Hypothetical proteins | Conserved      |               |
| WAN014IRZ_at   | SA1798 |        |         |          |         |        |      |  |            | conserved hypothetical protein                     | Hypothetical proteins | Conserved      |               |
| WAN014IS4_at   | SA0341 |        |         |          |         |        |      |  |            | conserved hypothetical protein                     | Hypothetical proteins | Conserved      |               |
| WAN014ISE_at   |        |        | SAR0628 |          |         |        |      |  |            | conserved hypothetical protein                     | Hypothetical proteins | Conserved      |               |
| WAN014ISG_at   | SA0354 |        |         |          |         |        |      |  |            | bacteriophage L54a, conserved hypothetical protein | Hypothetical proteins | Conserved      |               |
| WAN014ISH_at   | SA0348 |        |         |          |         |        |      |  |            | bacteriophage L54a, conserved hypothetical protein | Hypothetical proteins | Conserved      |               |
| WAN014ISP_at   | SA0381 |        | SAR1505 | SAS0946  |         | MW1388 |      |  |            | bacteriophage L54a, conserved hypothetical protein | Hypothetical proteins | Conserved      |               |
| WAN014ISQ_at   | SA0380 |        | SAR1506 | SAS0945  |         | MW1389 |      |  |            | bacteriophage L54a, conserved hypothetical protein | Hypothetical proteins | Conserved      |               |
| WAN014ISY_at   | SA0374 |        | SAR1512 | SAS0939  |         | MW1394 |      |  |            | bacteriophage L54a, conserved hypothetical protein | Hypothetical proteins | Conserved      |               |
| WAN014IT4_at   | SA0368 |        | SAR1518 | SAS0933  |         | MW1400 |      |  |            | bacteriophage L54a, conserved hypothetical protein | Hypothetical proteins | Conserved      |               |
| WAN014IT9_at   | SA0363 |        | SAR1523 | SAS0928  |         | MW1405 |      |  |            | bacteriophage L54a, conserved hypothetical protein | Hypothetical proteins | Conserved      |               |
| WAN014ITB_at   | SA0362 |        | SAR1526 | SAS0924  |         | MW1410 |      |  |            | bacteriophage L54a, conserved hypothetical protein | Hypothetical proteins | Conserved      |               |
| WAN014ITJ_at   | SA0333 |        |         |          |         |        |      |  |            | conserved hypothetical protein                     | Hypothetical proteins | Conserved      |               |
| WAN014IU9_at   |        |        | SAR1538 | SAS0912  |         | MW1422 |      |  |            | conserved hypothetical protein                     | Hypothetical proteins | Conserved      |               |
| WAN014IUA_at   | SA0329 |        | SAR1552 |          |         |        |      |  |            | bacteriophage L54a, conserved hypothetical protein | Hypothetical proteins | Conserved      |               |
| WAN014IUQ_at   | SA0330 |        | SAR1551 |          |         |        |      |  |            | bacteriophage L54a, conserved hypothetical protein | Hypothetical proteins | Conserved      |               |
| WAN014IUT_at   | SA0338 |        |         |          |         |        |      |  |            | conserved hypothetical protein                     | Hypothetical proteins | Conserved      |               |
| WAN014IV2_at   |        | SA0304 |         |          |         |        |      |  |            | conserved hypothetical protein                     | Hypothetical proteins | Conserved      |               |
| WAN014IVN_at   |        |        | SAR1324 |          |         |        |      |  |            | conserved hypothetical protein                     | Hypothetical proteins | Conserved      |               |
| WAN014IW2_at   | SA0051 |        |         |          |         |        |      |  |            | conserved hypothetical protein                     | Hypothetical proteins | Conserved      |               |
| WAN014IW3_at   | SA0349 |        |         |          |         |        |      |  |            | bacteriophage L54a, conserved hypothetical protein | Hypothetical proteins | Conserved      |               |
| WAN014IWQ_at   |        | SAV085 |         |          | SAV0858 |        |      |  |            | conserved hypothetical protein                     | Hypothetical proteins | Conserved      |               |
| WAN014IWR_at   |        |        |         |          | SAV1490 |        |      |  |            | conserved hypothetical protein                     | Hypothetical proteins | Conserved      |               |
| WAN014IWZ_at   |        |        |         | SAS1430  |         | MW1444 |      |  |            | conserved hypothetical protein                     | Hypothetical proteins | Conserved      |               |
| WAN014IXA_at   |        | SA1830 |         |          |         |        |      |  |            | conserved hypothetical protein                     | Hypothetical proteins | Conserved      |               |
| WAN014IXF_at   | SA0336 | SAV198 |         |          |         |        |      |  |            | bacteriophage L54a, conserved hypothetical protein | Hypothetical proteins | Conserved      |               |
| WAN014IXI_at   | SA0355 |        |         | SAS0917  |         |        |      |  |            | bacteriophage L54a, conserved hypothetical protein | Hypothetical proteins | Conserved      |               |
| WAN014IXQ_at   |        |        |         |          |         |        |      |  |            | conserved hypothetical protein                     | Hypothetical proteins | Conserved      |               |
| WAN01AT37_at   |        |        |         |          | SAV0883 | MW1917 |      |  |            | conserved hypothetical protein                     | Hypothetical proteins | Conserved      |               |
| WAN01A7HG_at   |        |        |         |          |         |        |      |  |            | conserved hypothetical protein                     | Hypothetical proteins | Conserved      |               |
| WAN01BOU8_at   | SA0038 |        |         |          |         | MW1377 |      |  |            | conserved hypothetical protein                     | Hypothetical proteins | Conserved      |               |
| WAN01BOUE_x_at | SA0044 |        |         |          |         |        |      |  |            | conserved hypothetical protein                     | Hypothetical proteins | Conserved      |               |
| WAN01BT2_x_at  |        |        | SAR0219 |          |         |        |      |  |            | conserved hypothetical protein                     | Hypothetical proteins | Conserved      |               |
| WAN01BT7Y_at   |        |        | SAR0426 |          |         |        |      |  |            | conserved hypothetical protein                     | Hypothetical proteins | Conserved      |               |
| WAN01BT8N_at   |        |        | SAR0451 |          |         |        |      |  |            | conserved hypothetical protein                     | Hypothetical proteins | Conserved      |               |
| WAN01BTNH_at   |        |        | SAR0982 |          |         |        |      |  |            | conserved hypothetical protein                     | Hypothetical proteins | Conserved      |               |
| WAN01BTO3_at   |        |        | SAR1006 |          |         |        |      |  |            | conserved hypothetical protein                     | Hypothetical proteins | Conserved      |               |
| WAN01BU5C_at   |        |        | SAR2259 | SAS2069  | SAV2167 | MW2094 |      |  |            | conserved hypothetical protein                     | Hypothetical proteins | Conserved      |               |
| WAN01BURL_at   |        |        | SAR2392 | SAS2200  | SAV2308 | MW2228 |      |  |            | conserved hypothetical protein                     | Hypothetical proteins | Conserved      |               |
| WAN01BUZL_at   |        |        | SAR2653 |          |         |        |      |  |            | conserved hypothetical protein                     | Hypothetical proteins | Conserved      |               |
| WAN01BV1S_at   |        |        | SAR2725 | SAS2532  | SAV2646 | MW2567 |      |  |            | conserved hypothetical protein                     | Hypothetical proteins | Conserved      |               |
| WAN01BV3G_at   |        |        | SAR2783 | SAS2586a | SAV2703 | MW2622 |      |  |            | conserved hypothetical protein                     | Hypothetical proteins | Conserved      |               |

| Systematic     | COL    | N315    | MRSA     | MSSA    | Mu50    | MW2    | GENE NAME | GenBank ID                                       | GenBank Desc. | Protein Function               | TIGR Main Role        | TIGR Sub Role |
|----------------|--------|---------|----------|---------|---------|--------|-----------|--------------------------------------------------|---------------|--------------------------------|-----------------------|---------------|
| WAN01BXOQ_at   |        |         |          | SAS0029 |         |        |           |                                                  |               | conserved hypothetical protein | Hypothetical proteins | Conserved     |
| WAN01BYV6_at   |        |         |          | SAS1429 |         | MW1443 |           |                                                  |               | conserved hypothetical protein | Hypothetical proteins | Conserved     |
| WAN01BYVW_at   |        |         |          | SAS2367 |         | MW2400 |           |                                                  |               | conserved hypothetical protein | Hypothetical proteins | Conserved     |
| WAN01C1SB_x_at |        |         |          | SAV0883 |         |        |           |                                                  |               | conserved hypothetical protein | Hypothetical proteins | Conserved     |
| WAN01C401_x_at | SAV088 |         |          | SAV0883 |         |        |           |                                                  |               | conserved hypothetical protein | Hypothetical proteins | Conserved     |
| WAN01C9TR_at   | SA0409 | SAR0449 | SAS0407  | SAV0449 | MW0405  |        |           |                                                  |               | conserved hypothetical protein | Hypothetical proteins | Conserved     |
| WAN01CAX9_x_at | SA1782 |         |          |         |         |        |           |                                                  |               | conserved hypothetical protein | Hypothetical proteins | Conserved     |
| WAN01CAXO_at   | SA1797 |         |          |         |         |        |           |                                                  |               | conserved hypothetical protein | Hypothetical proteins | Conserved     |
| WAN01CAYE_at   | SA1821 |         |          | SAV0799 |         |        |           |                                                  |               | conserved hypothetical protein | Hypothetical proteins | Conserved     |
| WAN01CAYF_x_at | SA1822 | SAR0380 |          | SAV2015 |         |        |           |                                                  |               | conserved hypothetical protein | Hypothetical proteins | Conserved     |
| WAN01CAYG_x_at | SA1823 |         |          | SAV2016 |         |        |           |                                                  |               | conserved hypothetical protein | Hypothetical proteins | Conserved     |
| WAN01CAYH_s_at | SA1824 |         |          | SAV2017 |         |        |           |                                                  |               | conserved hypothetical protein | Hypothetical proteins | Conserved     |
| WAN01CAYL_at   | SA1826 | SAR0377 |          | SAV2019 |         |        |           |                                                  |               | conserved hypothetical protein | Hypothetical proteins | Conserved     |
| WAN01CAYO_x_at | SA1831 |         |          | SAV2024 |         |        |           |                                                  |               | conserved hypothetical protein | Hypothetical proteins | Conserved     |
| WAN014GQO_at   | SA0066 |         |          |         |         |        |           |                                                  |               | conserved domain protein       | Hypothetical proteins | Domain        |
| WAN01BQI0_s_at | SA2201 |         |          |         |         |        |           |                                                  |               | conserved domain protein       | Hypothetical proteins | Domain        |
| WAN01BQI1_at   | SA2202 |         |          |         |         |        |           |                                                  |               | conserved domain protein       | Hypothetical proteins | Domain        |
| WAN01BQI2_at   | SA2211 |         |          |         |         |        | fnbA      | S.aureus fibronectin-binding protein (fnbA) mRNA |               | conserved domain protein       | Hypothetical proteins | Domain        |
| WAN014FRE_at   | SA1340 | SAR1320 |          |         |         |        |           |                                                  |               | hypothetical protein           | Hypothetical proteins | Not Conserved |
| WAN014FRR_at   | SA1348 | SAS039  | SAR1325  |         | SAV1314 |        |           |                                                  |               | hypothetical protein           | Hypothetical proteins | Not Conserved |
| WAN014FW1_at   | SA2336 |         |          |         |         |        |           |                                                  |               | hypothetical protein           | Hypothetical proteins | Not Conserved |
| WAN014G07_at   | SA2444 |         |          |         |         |        |           |                                                  |               | hypothetical protein           | Hypothetical proteins | Not Conserved |
| WAN014G0C_at   | SA1850 | SA1621  |          |         |         |        |           |                                                  |               | hypothetical protein           | Hypothetical proteins | Not Conserved |
| WAN014G35_at   | SA2005 |         |          |         |         |        |           |                                                  |               | hypothetical protein           | Hypothetical proteins | Not Conserved |
| WAN014G5M_at   | SA2543 |         |          |         |         |        |           |                                                  |               | hypothetical protein           | Hypothetical proteins | Not Conserved |
| WAN014G6D_at   | SA2558 |         |          |         |         |        |           |                                                  |               | hypothetical protein           | Hypothetical proteins | Not Conserved |
| WAN014G6E_at   | SA2559 |         |          |         |         |        |           |                                                  |               | hypothetical protein           | Hypothetical proteins | Not Conserved |
| WAN014G6I_at   | SA2230 | SA2009  |          |         | SAV2208 |        |           |                                                  |               | hypothetical protein           | Hypothetical proteins | Not Conserved |
| WAN014G74_x_at | SA2259 |         |          |         |         |        |           |                                                  |               | hypothetical protein           | Hypothetical proteins | Not Conserved |
| WAN014G8R_at   | SA2611 |         |          |         |         |        |           |                                                  |               | hypothetical protein           | Hypothetical proteins | Not Conserved |
| WAN014GAP_at   | SA2647 | SA2419  | SAR2704  | SAS2512 | SAV2626 | MW2546 |           |                                                  |               | hypothetical protein           | Hypothetical proteins | Not Conserved |
| WAN014GAW_x_at | SA2420 |         |          |         |         |        |           |                                                  |               | hypothetical protein           | Hypothetical proteins | Not Conserved |
| WAN014GD5_at   | SA0462 | SA0377  | SAR0411  |         | SAV0416 |        |           |                                                  |               | hypothetical protein           | Hypothetical proteins | Not Conserved |
| WAN014GDY_at   | SA2715 | SA2483  |          |         | SAV2691 |        |           |                                                  |               | hypothetical protein           | Hypothetical proteins | Not Conserved |
| WAN014GE6_at   | SA2728 | SAR2787 |          |         |         |        |           |                                                  |               | hypothetical protein           | Hypothetical proteins | Not Conserved |
| WAN014GE8_at   | SA0463 | SA0378  |          |         | SAV0417 |        |           |                                                  |               | hypothetical protein           | Hypothetical proteins | Not Conserved |
| WAN014GMA_at   | SA0258 |         |          |         |         |        |           |                                                  |               | hypothetical protein           | Hypothetical proteins | Not Conserved |
| WAN014GN4_at   | SA0268 |         |          |         |         |        |           |                                                  |               | hypothetical protein           | Hypothetical proteins | Not Conserved |
| WAN014GOT_at   | SA0060 |         |          |         |         |        |           |                                                  |               | hypothetical protein           | Hypothetical proteins | Not Conserved |
| WAN014GOZ_at   | SA0290 |         |          |         |         |        |           |                                                  |               | hypothetical protein           | Hypothetical proteins | Not Conserved |
| WAN014GSS_at   | SA0030 | SAR0036 |          |         |         |        |           |                                                  |               | hypothetical protein           | Hypothetical proteins | Not Conserved |
| WAN014GUD_at   | SA0406 |         |          |         |         |        |           |                                                  |               | hypothetical protein           | Hypothetical proteins | Not Conserved |
| WAN014GUM_at   | SA0035 |         |          |         |         | MW0033 |           |                                                  |               | hypothetical protein           | Hypothetical proteins | Not Conserved |
| WAN014GV0_at   | SA1156 |         |          |         |         |        |           |                                                  |               | hypothetical protein           | Hypothetical proteins | Not Conserved |
| WAN014GWQ_at   | SA1391 |         |          |         |         |        |           |                                                  |               | hypothetical protein           | Hypothetical proteins | Not Conserved |
| WAN014GWW_at   | SA0485 | SA0404  |          |         |         |        | lplB      |                                                  |               | hypothetical protein           | Hypothetical proteins | Not Conserved |
| WAN014GVY_at   | SA0483 |         |          |         |         |        |           |                                                  |               | hypothetical protein           | Hypothetical proteins | Not Conserved |
| WAN014GX5_at   | SA0487 |         |          |         |         |        |           |                                                  |               | hypothetical protein           | Hypothetical proteins | Not Conserved |
| WAN014GX7_at   | SA0488 | SA0407  | SAR0447  | SAS0405 | SAV0447 | MW0403 |           |                                                  |               | hypothetical protein           | Hypothetical proteins | Not Conserved |
| WAN014GXC_x_at | SA0493 |         |          |         |         |        |           |                                                  |               | hypothetical protein           | Hypothetical proteins | Not Conserved |
| WAN014GXX_at   | SA0055 |         |          |         |         |        |           |                                                  |               | hypothetical protein           | Hypothetical proteins | Not Conserved |
| WAN014H17_at   | SA0133 |         |          |         |         |        |           |                                                  |               | hypothetical protein           | Hypothetical proteins | Not Conserved |
| WAN014H19_at   | SA1507 | SA1300  | SAS1409a | SAV1467 | MW1357  |        |           |                                                  |               | hypothetical protein           | Hypothetical proteins | Not Conserved |
| WAN014H2A_at   | SA1527 |         |          |         |         |        |           |                                                  |               | hypothetical protein           | Hypothetical proteins | Not Conserved |
| WAN014H2E_at   | SA1529 |         |          |         |         |        |           |                                                  |               | hypothetical protein           | Hypothetical proteins | Not Conserved |
| WAN014H2K_x_at | SA1532 |         |          |         |         |        |           |                                                  |               | hypothetical protein           | Hypothetical proteins | Not Conserved |
| WAN014H4_at    | SA0076 | SA0069  |          |         |         |        |           |                                                  |               | hypothetical protein           | Hypothetical proteins | Not Conserved |
| WAN014H4O_at   | SA1575 |         | SAR1289  |         |         |        |           |                                                  |               | hypothetical protein           | Hypothetical proteins | Not Conserved |
| WAN014H51_at   | SA1580 |         | SAR1294  |         |         |        |           |                                                  |               | hypothetical protein           | Hypothetical proteins | Not Conserved |
| WAN014H5B_at   | SA1584 |         | SAR1298  |         |         |        |           |                                                  |               | hypothetical protein           | Hypothetical proteins | Not Conserved |
| WAN014H7O_at   | SA0082 |         |          |         |         |        |           |                                                  |               | hypothetical protein           | Hypothetical proteins | Not Conserved |
| WAN014H7U_at   | SA0702 |         |          |         |         |        |           |                                                  |               | hypothetical protein           | Hypothetical proteins | Not Conserved |
| WAN014H8_at    | SA1684 |         |          |         |         |        |           |                                                  |               | hypothetical protein           | Hypothetical proteins | Not Conserved |
| WAN014HB8_at   | SA0087 |         |          |         |         |        |           |                                                  |               | hypothetical protein           | Hypothetical proteins | Not Conserved |
| WAN014HH5_at   | SA0909 |         |          |         | SAV0914 |        |           |                                                  |               | hypothetical protein           | Hypothetical proteins | Not Conserved |
| WAN014HIO_at   | SA0923 |         |          |         |         |        |           |                                                  |               | hypothetical protein           | Hypothetical proteins | Not Conserved |
| WAN014HIU_at   | SA1815 |         |          |         |         |        |           |                                                  |               | hypothetical protein           | Hypothetical proteins | Not Conserved |
| WAN014HLI_at   | SA0933 |         |          |         |         |        |           |                                                  |               | hypothetical protein           | Hypothetical proteins | Not Conserved |
| WAN014HKB_at   | SA0039 |         |          |         |         |        |           |                                                  |               | hypothetical protein           | Hypothetical proteins | Not Conserved |
| WAN014HKK_at   | SA1851 |         |          |         |         |        |           |                                                  |               | hypothetical protein           | Hypothetical proteins | Not Conserved |
| WAN014HKN_at   | SA1853 |         | SAS1725  |         | MW1743  |        |           |                                                  |               | hypothetical protein           | Hypothetical proteins | Not Conserved |
| WAN014HLN_at   | SA0109 |         | SAS0099  |         | MW0098  |        |           |                                                  |               | hypothetical protein           | Hypothetical proteins | Not Conserved |
| WAN014HOC_at   | SA0112 |         |          |         |         |        |           |                                                  |               | hypothetical protein           | Hypothetical proteins | Not Conserved |
| WAN014HO7_at   | SA1042 | SAR1007 | SAS0970  |         | MW0918  |        |           |                                                  |               | hypothetical protein           | Hypothetical proteins | Not Conserved |
| WAN014HRW_at   | SA1959 |         |          |         |         |        |           |                                                  |               | hypothetical protein           | Hypothetical proteins | Not Conserved |
| WAN014HT8_at   | SA0040 |         | SAS0031  |         |         |        |           |                                                  |               | hypothetical protein           | Hypothetical proteins | Not Conserved |
| WAN014HV7_at   | SA2013 |         | SAS1931  |         | MW1948  |        |           |                                                  |               | hypothetical protein           | Hypothetical proteins | Not Conserved |
| WAN014HYI_at   | SA1684 |         |          |         |         |        |           |                                                  |               | hypothetical protein           | Hypothetical proteins | Not Conserved |
| WAN014IG_at    | SA1273 |         |          |         |         |        |           |                                                  |               | hypothetical protein           | Hypothetical proteins | Not Conserved |
| WAN014I54_at   | SA2204 |         |          |         |         |        |           |                                                  |               | hypothetical protein           | Hypothetical proteins | Not Conserved |
| WAN014IKC_x_at | SA1341 |         |          |         |         |        |           |                                                  |               | hypothetical protein           | Hypothetical proteins | Not Conserved |
| WAN014IKD_x_at | SA1342 |         |          |         |         |        |           |                                                  |               | hypothetical protein           | Hypothetical proteins | Not Conserved |
| WAN014IML_at   | SA0481 |         |          |         |         |        |           |                                                  |               | hypothetical protein           | Hypothetical proteins | Not Conserved |
| WAN014IMN_at   | SA0482 |         |          |         |         |        |           |                                                  |               | hypothetical protein           | Hypothetical proteins | Not Conserved |
| WAN014IMP_at   | SA0486 |         |          |         |         |        |           |                                                  |               | hypothetical protein           | Hypothetical proteins | Not Conserved |
| WAN014IMQ_x_at | SA0484 |         |          |         | MW0401  |        |           |                                                  |               | hypothetical protein           | Hypothetical proteins | Not Conserved |
| WAN014IN1_x_at | SA0894 |         |          | SAV2024 |         |        |           |                                                  |               | hypothetical protein           | Hypothetical proteins | Not Conserved |
| WAN014IOB_at   | SA1174 |         | SAS1097a |         | MW1045  |        |           |                                                  |               | hypothetical protein           | Hypothetical proteins | Not Conserved |
| WAN014IOH_x_at | SA1333 | SA1151  | SAS1245  | SAV1311 | MW1193  |        |           |                                                  |               | hypothetical protein           | Hypothetical proteins | Not Conserved |
| WAN014IOI_at   | SA2496 |         |          |         |         |        |           |                                                  |               | hypothetical protein           | Hypothetical proteins | Not Conserved |
| WAN014IOO_at   | SA0450 | SAR0397 | SAS0356  |         | MW0355  |        |           |                                                  |               | hypothetical protein           | Hypothetical proteins | Not Conserved |
| WAN014IRD_at   | SA0911 |         |          |         |         |        |           |                                                  |               | hypothetical protein           | Hypothetical proteins | Not Conserved |
| WAN014IUI_at   | SA1347 |         |          |         |         |        |           |                                                  |               | hypothetical protein           | Hypothetical proteins | Not Conserved |
| WAN014IUII_at  | SA1350 | SAS040  | SAS1257  | SAV1316 | MW1204  |        |           |                                                  |               | hypothetical protein           | Hypothetical proteins | Not Conserved |
| WAN014IUS_at   | SA0489 | SA0408  | SAR0448  | SAS0406 | SAV0448 | MW0404 |           |                                                  |               | hypothetical protein           | Hypothetical proteins | Not Conserved |
| WAN014IUZ_at   | SA0219 | SAS007  | SAS0215  | SAV0239 | MW0215  |        |           |                                                  |               | hypothetical protein           | Hypothetical proteins | Not Conserved |
| WAN014IVK_at   | SA1344 |         | SAR1312  |         |         |        |           |                                                  |               | hypothetical protein           | Hypothetical proteins | Not Conserved |
| WAN014IVL_at   | SA1339 |         |          |         |         |        |           |                                                  |               | hypothetical protein           | Hypothetical proteins | Not Conserved |
| WAN014IWW_at   | SA1528 |         |          |         |         |        |           |                                                  |               | hypothetical protein           | Hypothetical proteins | Not Conserved |
| WAN014IWY_at   | SA1533 |         |          |         |         |        |           |                                                  |               | hypothetical protein           | Hypothetical proteins | Not Conserved |
| WAN014IXL_at   | SA0893 | SA1832  |          | SAV2025 |         |        |           |                                                  |               | hypothetical protein           | Hypothetical proteins | Not Conserved |
| WAN01BOU7_at   | SA0037 |         |          |         | MW0035  |        |           |                                                  |               | hypothetical protein           | Hypothetical proteins | Not Conserved |

| Systematic       | COL | N315   | MRSA     | MSSA    | Mu50        | MW2     | GENE NAME | GenBank ID     | GenBank Desc.                                                       | Protein Function                                        | TIGR Main Role                             | TIGR Sub Role        |
|------------------|-----|--------|----------|---------|-------------|---------|-----------|----------------|---------------------------------------------------------------------|---------------------------------------------------------|--------------------------------------------|----------------------|
| WAN01BOUQ_at     |     | SA0056 |          |         |             |         |           |                |                                                                     | hypothetical protein                                    | Hypothetical proteins                      | Not Conserved        |
| WAN01BP0A_at     |     | SA0256 |          |         |             |         |           |                |                                                                     | hypothetical protein                                    | Hypothetical proteins                      | Not Conserved        |
| WAN01BP0C_at     |     | SA0475 |          |         |             |         |           |                |                                                                     | hypothetical protein                                    | Hypothetical proteins                      | Not Conserved        |
| WAN01BPFR_at     |     | SA0819 |          |         |             |         |           |                |                                                                     | hypothetical protein                                    | Hypothetical proteins                      | Not Conserved        |
| WAN01BPTJ_at     |     | SA1318 |          |         |             |         |           |                |                                                                     | hypothetical protein                                    | Hypothetical proteins                      | Not Conserved        |
| WAN01BPTV_at     |     | SA1330 |          |         |             |         |           |                |                                                                     | hypothetical protein                                    | Hypothetical proteins                      | Not Conserved        |
| WAN01BPUG_at     |     | SA1343 |          |         |             |         |           |                |                                                                     | hypothetical protein                                    | Hypothetical proteins                      | Not Conserved        |
| WAN01BPUL_at     |     | SA1356 |          |         |             |         |           |                |                                                                     | hypothetical protein                                    | Hypothetical proteins                      | Not Conserved        |
| WAN01BPZ6_at     |     | SA1521 |          |         |             |         |           |                |                                                                     | hypothetical protein                                    | Hypothetical proteins                      | Not Conserved        |
| WAN01BQ9B_at     |     | SA1886 |          |         |             |         |           |                |                                                                     | hypothetical protein                                    | Hypothetical proteins                      | Not Conserved        |
| WAN01BQ9Z_at     |     | SA1910 |          | SAS1774 |             |         |           |                |                                                                     | hypothetical protein                                    | Hypothetical proteins                      | Not Conserved        |
| WAN01BQ9B_at     |     | SA2032 |          |         |             |         |           |                |                                                                     | hypothetical protein                                    | Hypothetical proteins                      | Not Conserved        |
| WAN01BQ9E_at     |     | SA2065 |          |         |             |         |           |                |                                                                     | hypothetical protein                                    | Hypothetical proteins                      | Not Conserved        |
| WAN01BQHM_at     |     | SA2187 |          |         |             |         |           |                |                                                                     | hypothetical protein                                    | Hypothetical proteins                      | Not Conserved        |
| WAN01BQJG_at     |     | SA2254 |          |         |             |         |           |                |                                                                     | hypothetical protein                                    | Hypothetical proteins                      | Not Conserved        |
| WAN01BQMO_at     |     | SA2370 |          |         |             |         |           |                |                                                                     | hypothetical protein                                    | Hypothetical proteins                      | Not Conserved        |
| WAN01BQ07_at     |     | SA2497 |          |         |             |         |           |                |                                                                     | hypothetical protein                                    | Hypothetical proteins                      | Not Conserved        |
| WAN01BQ0K_at     |     | SA2510 |          |         |             |         |           |                |                                                                     | hypothetical protein                                    | Hypothetical proteins                      | Not Conserved        |
| WAN01BT7O_at     |     |        |          | SAR0414 |             |         |           |                |                                                                     | hypothetical protein                                    | Hypothetical proteins                      | Not Conserved        |
| WAN014KXZ_at     |     | SA0764 |          |         |             |         |           |                |                                                                     | Tn554, transposase C                                    | Mobile and extrachromosomal element functi |                      |
| WAN01CASJ_s_at   |     | SA1622 |          |         |             |         |           |                |                                                                     | transposase, degenerate                                 | Mobile and extrachromosomal element functi |                      |
| WAN014G0Y_at     |     |        | SAR1562  |         |             | MW1442  |           | AB008796-cds3  | Staphylococcus aureus (strain:ATCC49775) DNA                        | integrase                                               | Mobile and extrachromosomal element functi | Prophage functions   |
| AF217235-cds5_at |     |        | SAR0382  | SAS1932 | SAV0800     | MW1949  | g1p       | AF217235-cds5  | Gene:Product:orf5>Note:similar to phage terminase small subunit     | bacteriophage terminase small subunit                   | Mobile and extrachromosomal element functi | Prophage functions   |
| WAN01BUIE_at     |     |        | SAR2071  |         |             |         |           | AP001553-cds35 | bacteriophage phi ETA (specific_host:Staphylococcus aureus E-1) DNA | hypothetical phage protein-related protein              | Mobile and extrachromosomal element functi | Prophage functions   |
| WAN014IRY_at     |     | SAV088 |          |         | SAV0885     |         | g1p       |                | Staphylococcus aureus subsp. aureus Mu50 GENE=""SAV0885""           | small terminase                                         | Mobile and extrachromosomal element functi | Prophage functions   |
| WAN014R0X_at     |     | SAV088 |          |         | SAV0886     |         |           |                | Staphylococcus aureus subsp. aureus Mu50 GENE=""SAV0886""           | phage terminase, large subunit, PBXS family             | Mobile and extrachromosomal element functi | Prophage functions   |
| WAN014L3L_at     |     |        |          |         | SAV0887     |         |           |                | Staphylococcus aureus subsp. aureus Mu50 GENE=""SAV0887""           | phage portal protein, SPP1 family                       | Mobile and extrachromosomal element functi | Prophage functions   |
| WAN014IRL_at     |     | SAV090 |          |         | SAV0887     |         |           |                | Staphylococcus aureus subsp. aureus Mu50 GENE=""SAV0887""           | phage uncontracted protein, XkoX family, putative       | Mobile and extrachromosomal element functi | Prophage functions   |
| WAN014INB_x_at   |     | SA0905 |          |         | U93688-cds3 |         |           |                | Gene:Product:Note:orf3                                              | pathogenicity island, ORF6                              | Mobile and extrachromosomal element functi | Prophage functions   |
| WAN014INT_x_at   |     | SA0904 |          |         | U93688-cds4 |         |           |                | Gene:Product:Note:orf4                                              | pathogenicity island, ORF7                              | Mobile and extrachromosomal element functi | Prophage functions   |
| WAN014IN6_x_at   |     | SA0903 |          |         | U93688-cds5 |         |           |                | Gene:Product:Note:orf5                                              | pathogenicity island, ORF5                              | Mobile and extrachromosomal element functi | Prophage functions   |
| WAN014HGF_x_at   |     | SA0900 |          |         | U93688-cds7 |         |           |                | Gene:Product:Note:orf7                                              | pathogenicity island, ORF1                              | Mobile and extrachromosomal element functi | Prophage functions   |
| WAN014FUI_at     |     |        |          | SAS0891 |             |         |           |                |                                                                     | prophage L54a, integrase                                | Mobile and extrachromosomal element functi | Prophage functions   |
| WAN014FUM_at     |     |        |          | SAS0900 |             |         |           |                |                                                                     | hypothetical phage protein-related protein              | Mobile and extrachromosomal element functi | Prophage functions   |
| WAN014FWM_at     |     |        |          | SAS0899 |             |         |           |                |                                                                     | hypothetical phage protein-related protein              | Mobile and extrachromosomal element functi | Prophage functions   |
| WAN014FWN_at     |     |        |          | SAS0901 |             |         |           |                |                                                                     | hypothetical phage protein-related protein              | Mobile and extrachromosomal element functi | Prophage functions   |
| WAN014FWS_at     |     |        |          | SAS0922 |             |         |           |                |                                                                     | hypothetical phage protein                              | Mobile and extrachromosomal element functi | Prophage functions   |
| WAN014G17_at     |     | int. i |          |         |             | SAV0392 |           |                |                                                                     | integrase homolog                                       | Mobile and extrachromosomal element functi | Prophage functions   |
| WAN014G5Y_at     |     | SAV197 |          |         |             | SAV1975 |           |                |                                                                     | phage integrase family protein                          | Mobile and extrachromosomal element functi | Prophage functions   |
| WAN014GL3_at     |     |        | SAR2047  |         |             |         |           |                |                                                                     | hypothetical phage protein-related protein              | Mobile and extrachromosomal element functi | Prophage functions   |
| WAN014GOA_at     |     |        | SAR1545  |         |             |         |           |                |                                                                     | hypothetical phage protein                              | Mobile and extrachromosomal element functi | Prophage functions   |
| WAN014HG9_at     |     | SA0898 |          |         |             | SAV0792 |           |                |                                                                     | pathogenicity island, ORF12                             | Mobile and extrachromosomal element functi | Prophage functions   |
| WAN014H0H_at     |     |        | SAR0366  |         |             |         |           |                |                                                                     | prophage L54a, integrase                                | Mobile and extrachromosomal element functi | Prophage functions   |
| WAN014HS8_at     |     |        | SAR0629  |         |             |         |           |                |                                                                     | phage integrase family protein                          | Mobile and extrachromosomal element functi | Prophage functions   |
| WAN014HUS_at     |     |        | SAR2051  |         |             |         |           |                |                                                                     | hypothetical phage protein-related protein              | Mobile and extrachromosomal element functi | Prophage functions   |
| WAN014HUY_at     |     |        | SAR2058  |         | SAV1960     |         |           |                |                                                                     | phage head-tail adaptor, putative                       | Mobile and extrachromosomal element functi | Prophage functions   |
| WAN014HV2_at     |     |        | SAR2063  |         | SAV1965     |         |           |                |                                                                     | phage portal protein, HK97 family                       | Mobile and extrachromosomal element functi | Prophage functions   |
| WAN014HV3_at     |     |        | SAR2073  |         | SAV1966     |         |           |                |                                                                     | phage terminase, large subunit, putative                | Mobile and extrachromosomal element functi | Prophage functions   |
| WAN014HVB_at     |     |        | SAR2089  |         |             |         |           |                |                                                                     | hypothetical phage protein                              | Mobile and extrachromosomal element functi | Prophage functions   |
| WAN014HX4_at     |     | SA2702 |          |         | SAR1557     |         |           |                |                                                                     | similar to protein gp35 from Bacteriophage A118         | Mobile and extrachromosomal element functi | Prophage functions   |
| WAN014HXS_at     |     | SA1802 |          |         | SAR2097     |         |           |                |                                                                     | hypothetical phage protein                              | Mobile and extrachromosomal element functi | Prophage functions   |
| WAN014HV4_at     |     |        | SAR2053  |         |             |         |           |                |                                                                     | hypothetical phage protein                              | Mobile and extrachromosomal element functi | Prophage functions   |
| WAN014HVF_x_at   |     |        |          | SAS0921 |             |         |           |                |                                                                     | hypothetical phage protein-related protein              | Mobile and extrachromosomal element functi | Prophage functions   |
| WAN014IKM_x_at   |     |        | SAR1522  | SAS0929 |             |         |           |                |                                                                     | prophage L54a, transcriptional regulator, RinA family   | Mobile and extrachromosomal element functi | Prophage functions   |
| WAN014IL6_x_at   |     |        |          |         | SAV0896     |         |           |                |                                                                     | phage protein, HK97 gp10 family                         | Mobile and extrachromosomal element functi | Prophage functions   |
| WAN014ILZ_at     |     | SA1805 | SAR2100  |         |             |         |           |                |                                                                     | repressor protein, putative                             | Mobile and extrachromosomal element functi | Prophage functions   |
| WAN014INC_x_at   |     | SA0906 | SAR0382  | SAS1932 | SAV0800     | MW1949  |           |                |                                                                     | terminase small subunit                                 | Mobile and extrachromosomal element functi | Prophage functions   |
| WAN014IDC_at     |     |        | SAR0382  | SAS1932 | SAV0800     | MW1949  | g1p       |                |                                                                     | bacteriophage terminase small subunit                   | Mobile and extrachromosomal element functi | Prophage functions   |
| WAN014IQS_at     |     | SA0901 |          |         |             |         |           |                |                                                                     | pathogenicity island, ORF10                             | Mobile and extrachromosomal element functi | Prophage functions   |
| WAN014IR3_at     |     |        | int. i   |         | SAV0847     |         | int       |                |                                                                     | integrase                                               | Mobile and extrachromosomal element functi | Prophage functions   |
| WAN014IVD_at     |     |        | SAR1524  | SAS0927 |             | MW1406  |           |                |                                                                     | phage protein, putative                                 | Mobile and extrachromosomal element functi | Prophage functions   |
| WAN014IXE_at     |     | SA1835 |          |         | SAV2028     |         |           |                |                                                                     | integrase-like protein                                  | Mobile and extrachromosomal element functi | Prophage functions   |
| WAN014SHF_x_at   |     |        | SAR1522  | SAS0929 |             |         |           |                |                                                                     | prophage L54a, transcriptional regulator, RinA family   | Mobile and extrachromosomal element functi | Prophage functions   |
| WAN01ASHH_x_at   |     |        | SAR1524  | SAS0927 |             | MW1406  |           |                |                                                                     | phage protein, putative                                 | Mobile and extrachromosomal element functi | Prophage functions   |
| WAN01ASHS_x_at   |     |        |          | SAS0916 |             |         |           |                |                                                                     | phage conserved hypothetical protein TIGR01671          | Mobile and extrachromosomal element functi | Prophage functions   |
| WAN01AT7E_at     |     |        |          | SAV0912 |             |         |           |                |                                                                     | holin                                                   | Mobile and extrachromosomal element functi | Prophage functions   |
| WAN01AT7V_at     |     |        |          | SAV0896 |             |         |           |                |                                                                     | phage protein, HK97 gp10 family                         | Mobile and extrachromosomal element functi | Prophage functions   |
| WAN01AT7W_x_at   |     |        |          | SAV0896 |             |         |           |                |                                                                     | phage protein, HK97 gp10 family                         | Mobile and extrachromosomal element functi | Prophage functions   |
| WAN01AT73_at     |     |        |          | SAV0887 |             |         |           |                |                                                                     | phage portal protein, SPP1 family                       | Mobile and extrachromosomal element functi | Prophage functions   |
| WAN01A717_x_at   |     |        | SAR1522  | SAS0929 |             |         |           |                |                                                                     | prophage L54a, transcriptional regulator, RinA family   | Mobile and extrachromosomal element functi | Prophage functions   |
| WAN01A719_x_at   |     |        | SAR1524  | SAS0927 |             | MW1406  |           |                |                                                                     | phage protein, putative                                 | Mobile and extrachromosomal element functi | Prophage functions   |
| WAN01BU2W_x_at   |     |        | SAR1522  | SAS0929 |             |         |           |                |                                                                     | prophage L54a, transcriptional regulator, RinA family   | Mobile and extrachromosomal element functi | Prophage functions   |
| WAN01BU34_at     |     |        | SAR1528  |         |             |         |           |                |                                                                     | hypothetical phage protein-related protein              | Mobile and extrachromosomal element functi | Prophage functions   |
| WAN01BU35_at     |     |        | SAR1529  |         |             |         |           |                |                                                                     | bacteriophage terminase small subunit                   | Mobile and extrachromosomal element functi | Prophage functions   |
| WAN01CAYD_at     |     | SA1820 | SAR0382  |         | SAV2012     |         | g1p       |                |                                                                     | Transposase B from transposon Tn554                     | Mobile and extrachromosomal element functi | Transposon functions |
| WAN01CBET_s_at   |     | SA2387 | SAR1738  |         | SAV1658     |         | Tn554     | AB037671-cds17 | Staphylococcus aureus (strain:85/2082) DNA.                         | Transposase B from transposon Tn554                     | Mobile and extrachromosomal element functi | Transposon functions |
| WAN014IN9_at     |     | SA0763 | SAR1738  |         | SAV1658     |         | Tn554     | AB037671-cds76 | Staphylococcus aureus (strain:85/2082) DNA.                         | Transposase B from transposon Tn554                     | Mobile and extrachromosomal element functi | Transposon functions |
| WAN014IN3_at     |     |        | SAR0382  |         | SAV1804     |         |           | AB047239-cds3  | Staphylococcus aureus (strain:ATCC25923) DNA.                       | truncated transposase                                   | Mobile and extrachromosomal element functi | Transposon functions |
| WAN01CBEU_s_at   |     | SA2388 | SAR1739  |         | SAV1659     |         | Tn554     | L10909-cds1    | Staphylococcus aureus (strain R35) DNA.                             | Transposase A from transposon Tn554                     | Mobile and extrachromosomal element functi | Transposon functions |
| WAN014IQ7_at     |     | SAVP01 |          |         | SAV0P17     |         | HIN       |                | Staphylococcus aureus Bacteria; Firmicutes; GENE=""res""            | resolvase                                               | Mobile and extrachromosomal element functi | Transposon functions |
| WAN014GGW_at     |     |        |          |         | SAV0P13     |         |           |                | Staphylococcus aureus subsp. aureus Mu50 GENE=""truncated-res""     | resolvase                                               | Mobile and extrachromosomal element functi | Transposon functions |
| WAN014G5Z_at     |     | SA1624 |          |         | SAV1806     |         |           |                |                                                                     | Transposase for insertion sequence element              | Mobile and extrachromosomal element functi | Transposon functions |
| WAN014G4C_at     |     |        |          |         | SAV0415     |         |           |                |                                                                     | transposase, Mutator family                             | Mobile and extrachromosomal element functi | Transposon functions |
| WAN014GFO_at     |     |        | SA2014   |         | SAV2215     |         |           |                |                                                                     | Transposase for insertion sequence element              | Mobile and extrachromosomal element functi | Transposon functions |
| WAN014HNO_at     |     | SA0062 |          |         | SAV0066     |         | orfB      |                |                                                                     | transposase                                             | Mobile and extrachromosomal element functi | Transposon functions |
| WAN014HNT_at     |     | SA0063 |          |         | SAV0067     |         |           |                |                                                                     | transposase                                             | Mobile and extrachromosomal element functi | Transposon functions |
| WAN014HSK_at     |     |        | SAR0726  |         |             |         |           |                |                                                                     | IS431mec transposase                                    | Mobile and extrachromosomal element functi | Transposon functions |
| WAN014H0C_at     |     |        | SAR0081  |         |             |         |           |                |                                                                     | transposase, IS3 family                                 | Mobile and extrachromosomal element functi | Transposon functions |
| WAN014IQR_at     |     |        | SAR1827  |         |             |         |           |                |                                                                     | Transposase for transposon Tn552 (ORF 480)              | Mobile and extrachromosomal element functi | Transposon functions |
| WAN014IRC_at     |     | SA0064 | SAR0066  |         | SAV0068     |         | pXO1      |                |                                                                     | transposase                                             | Mobile and extrachromosomal element functi | Transposon functions |
| WAN014IU6_at     |     |        | SAR2307  |         |             |         | ORFB      |                |                                                                     | transposase                                             | Mobile and extrachromosomal element functi | Transposon functions |
| WAN014IU7_at     |     |        | SAR0520  |         |             |         |           |                |                                                                     | tnpA-IS1253-like                                        | Mobile and extrachromosomal element functi | Transposon functions |
| WAN01BX02_at     |     |        | SAR1560  | SAS0893 |             | MW1440  |           |                |                                                                     | hypothetical protein                                    | No Data                                    | No Data              |
| WAN01BYP5_at     |     |        | SAS2107  |         |             | MW2133  |           |                |                                                                     | hypothetical protein                                    | No Data                                    | No Data              |
| WAN01BZ3H_at     |     |        | SAS2579a |         |             | MW2614  |           |                |                                                                     | hypothetical protein                                    | No Data                                    | No Data              |
| WAN014H4S_at     |     | SA1576 | SAR1290  |         |             |         |           |                |                                                                     | traG protein                                            | Other categories                           | Plasmid functions    |
| WAN014HF0_at     |     | SA0892 |          |         |             |         |           |                |                                                                     | Tn557, ORF14                                            | Other categories                           | Plasmid functions    |
| WAN014H41_at     |     | SA0318 |          |         |             | int     |           | M27965-cds2    | Bacteriophage L54a DNA.                                             | bacteriophage L54a, integrase                           | Other categories                           | Prophage functions   |
| WAN014GOE_at     |     | SA0885 |          |         |             | int     |           | U93688-cds17   | Staphylococcus aureus.                                              | integrase                                               | Other categories                           | Prophage functions   |
| WAN014GQL_at     |     | SA0331 |          |         |             |         |           |                |                                                                     | bacteriophage L54a, hypothetical protein                | Other categories                           | Prophage functions   |
| WAN014GOM_at     |     | SA0889 |          |         |             |         |           |                |                                                                     | gp35, putative                                          | Other categories                           | Prophage functions   |
| WAN014GQX_at     |     | SA0339 |          |         |             |         |           |                |                                                                     | bacteriophage L54a, single-stranded DNA binding protein | Other categories                           | Prophage functions   |

| Systematic        | COL    | GENE    |         |         |         |        |            | GenBank ID     | GenBank Desc.                                                               | Protein Function               | TIGR Main Role                                       | TIGR Sub Role |
|-------------------|--------|---------|---------|---------|---------|--------|------------|----------------|-----------------------------------------------------------------------------|--------------------------------|------------------------------------------------------|---------------|
|                   |        | N315    | MRSA    | MSSA    | Mu50    | MW2    | NAME       |                |                                                                             |                                |                                                      |               |
| WAN014GR9_at      | SA0346 |         |         |         |         |        |            |                | bacteriophage L54a, DNA N-6-adenine-methyltransferase                       | Other categories               | Prophage functions                                   |               |
| WAN014GRW_at      | SA0359 |         |         |         | SAV0878 |        |            |                | bacteriophage L54a, hypothetical protein                                    | Other categories               | Prophage functions                                   |               |
| WAN014IL_at       | SA0319 |         |         |         |         |        |            |                | bacteriophage L54a, hypothetical protein                                    | Other categories               | Prophage functions                                   |               |
| WAN014IMA_x_at    | SA0353 |         |         |         |         |        |            |                | bacteriophage L54a, hypothetical protein                                    | Other categories               | Prophage functions                                   |               |
| WAN014IMF_x_at    | SA0364 |         | SAR1522 | SAS0929 |         |        |            |                | bacteriophage L54a, hypothetical protein                                    | Other categories               | Prophage functions                                   |               |
| WAN014IQA_at      | SA0328 |         | SAR1549 |         | MW1433  |        |            |                | bacteriophage L54a, hypothetical protein                                    | Other categories               | Prophage functions                                   |               |
| WAN014IS1_at      | SA0344 |         |         |         |         |        |            |                | bacteriophage L54a, hypothetical protein                                    | Other categories               | Prophage functions                                   |               |
| WAN014IS2_at      | SA0343 |         |         |         |         |        |            |                | bacteriophage L54a, DNA8-like helicase family protein                       | Other categories               | Prophage functions                                   |               |
| WAN014IS3_at      | SA0342 |         |         |         |         |        |            |                | bacteriophage L54a, hypothetical protein                                    | Other categories               | Prophage functions                                   |               |
| WAN014IS5_at      | SA0335 |         |         |         |         |        |            |                | bacteriophage L54a, hypothetical protein                                    | Other categories               | Prophage functions                                   |               |
| WAN014IS7_at      | SA0325 |         |         |         |         |        |            |                | bacteriophage L54a, antirepressor, putative                                 | Other categories               | Prophage functions                                   |               |
| WAN014IS9_at      | SA0323 |         |         |         |         |        |            |                | bacteriophage L54a, hypothetical protein                                    | Other categories               | Prophage functions                                   |               |
| WAN014ISA_at      | SA0322 |         |         |         |         |        |            |                | bacteriophage L54a, Cro-related protein                                     | Other categories               | Prophage functions                                   |               |
| WAN014ISL_at      | SA0388 |         | SAR1498 | SAS0953 |         | MW1381 |            |                | bacteriophage L54a, holin                                                   | Other categories               | Prophage functions                                   |               |
| WAN014ISK_at      | SA0386 |         | SAR1500 | SAS0951 |         | MW1383 |            |                | bacteriophage L54a, hypothetical protein                                    | Other categories               | Prophage functions                                   |               |
| WAN014ISM_at      | SA0384 |         | SAR1502 | SAS0949 |         | MW1385 |            |                | bacteriophage L54a, hypothetical protein                                    | Other categories               | Prophage functions                                   |               |
| WAN014ISN_at      | SA0383 |         | SAR1503 | SAS0948 |         | MW1386 |            |                | bacteriophage L54a, hypothetical protein                                    | Other categories               | Prophage functions                                   |               |
| WAN014ISQ_at      | SA0382 |         | SAR1504 | SAS0947 |         | MW1387 |            |                | bacteriophage L54a, hypothetical protein                                    | Other categories               | Prophage functions                                   |               |
| WAN014IST_at      | SA0378 |         | SAR1508 | SAS0943 |         |        |            |                | bacteriophage L54a, hypothetical protein                                    | Other categories               | Prophage functions                                   |               |
| WAN014ISU_at      | SA0377 |         | SAR1509 | SAS0942 |         | MW1391 |            |                | bacteriophage L54a, hypothetical protein                                    | Other categories               | Prophage functions                                   |               |
| WAN014ISX_at      | SA0375 |         | SAR1511 | SAS0940 |         | MW1393 |            |                | bacteriophage L54a, hypothetical protein                                    | Other categories               | Prophage functions                                   |               |
| WAN014ISZ_at      | SA0373 |         | SAR1513 | SAS0938 |         | MW1395 |            |                | bacteriophage L54a, hypothetical protein                                    | Other categories               | Prophage functions                                   |               |
| WAN014IT0_at      | SA0372 |         | SAR1514 | SAS0937 |         | MW1396 |            |                | bacteriophage L54a, hypothetical protein                                    | Other categories               | Prophage functions                                   |               |
| WAN014IT1_at      | SA0371 |         | SAR1515 | SAS0936 |         | MW1397 |            |                | bacteriophage L54a, hypothetical protein                                    | Other categories               | Prophage functions                                   |               |
| WAN014IT2_at      | SA0370 |         | SAR1516 | SAS0935 |         | MW1398 |            |                | bacteriophage L54a, hypothetical protein                                    | Other categories               | Prophage functions                                   |               |
| WAN014IT3_at      | SA0369 |         | SAR1517 | SAS0934 |         | MW1399 | clpP       |                | bacteriophage L54a, ATP-dependent Clp protease, proteolytic subunit ClpP    | Other categories               | Prophage functions                                   |               |
| WAN014IT5_at      | SA0367 |         |         |         |         |        |            |                | bacteriophage L54a, phage D3 terminase, putative                            | Other categories               | Prophage functions                                   |               |
| WAN014IT6_at      | SA0366 |         | SAR1520 | SAS0931 |         | MW1402 |            |                | bacteriophage L54a, hypothetical protein                                    | Other categories               | Prophage functions                                   |               |
| WAN014IT8_at      | SA0365 |         |         |         |         |        |            |                | bacteriophage L54a, HNH endonuclease family protein                         | Other categories               | Prophage functions                                   |               |
| WAN014ITK_at      | SA0327 |         | SAR1550 |         | MW1434  |        |            |                | bacteriophage L54a, hypothetical protein                                    | Other categories               | Prophage functions                                   |               |
| WAN014IW5_at      | SA0326 |         |         |         | SAV0856 |        |            |                | bacteriophage L54a, hypothetical protein                                    | Other categories               | Prophage functions                                   |               |
| WAN014IX3_at      | SA0389 |         |         |         |         |        |            |                | bacteriophage L54a, amidase, putative                                       | Other categories               | Prophage functions                                   |               |
| WAN014IY2_at      | SA0321 |         |         |         |         |        |            |                | bacteriophage L54a, repressor protein                                       | Other categories               | Prophage functions                                   |               |
| WAN01BQCT_at      | SA0214 | SAR0382 | SAS1932 | SAV0800 | MW1949  |        |            |                | terminase small subunit                                                     | Other categories               | Prophage functions                                   |               |
| WAN014GEW_at      | SA0464 | SA0379  |         | SAV0418 |         |        |            |                | transposase family protein                                                  | Other categories               | Transposon functions                                 |               |
| WAN014HOK_at      | SA0366 |         |         |         | MW0034  |        |            |                | IS1272, transposase                                                         | Other categories               | Transposon functions                                 |               |
| WAN014IYC_at      | SA1839 |         |         |         | MW0122  |        |            |                | transposase, IS200 family                                                   | Other categories               | Transposon functions                                 |               |
| WAN014IT7_at      |        |         | SAR1022 |         | MW0932  |        |            | AF309515-cds1  | glutathionyl endopeptidase precursor                                        | Protein fate                   | Degradation of proteins, peptides, and glycopeptides |               |
| WAN01BV1J_at      |        |         | SAR2716 |         |         |        |            | AJ249166-cds1  | zinc metalloproteinase aureolysin                                           | Protein fate                   | Degradation of proteins, peptides, and glycopeptides |               |
| WAN014G4P_at      |        |         |         | SAV0892 |         |        |            |                | Staphylococcus aureus subsp. aureus Mu50 GENE=="SAV0892""                   | Protein fate                   | Degradation of proteins, peptides, and glycopeptides |               |
| WAN014IRT_at      | SAV089 |         |         | SAV0892 |         |        |            |                | Staphylococcus aureus subsp. aureus Mu50 GENE=="SAV0892""                   | Protein fate                   | Degradation of proteins, peptides, and glycopeptides |               |
| WAN014GLC_at      | SA1766 |         |         | SAV1812 | MW1754  |        |            |                | M23M37 peptidase domain protein                                             | Protein fate                   | Degradation of proteins, peptides, and glycopeptides |               |
| WAN014BQD_x_at    | SA1852 |         |         | SAV1735 |         |        |            |                | serine protease SplD                                                        | Protein fate                   | Degradation of proteins, peptides, and glycopeptides |               |
| WAN01BUDP_at      |        |         | SAR1905 |         | SAV1754 |        |            |                | peptidase, SprF family                                                      | Protein fate                   | Degradation of proteins, peptides, and glycopeptides |               |
| WAN01BTSN_at      |        |         | SAR0343 |         |         |        |            |                | serine protease SplA                                                        | Protein fate                   | Degradation of proteins, peptides, and glycopeptides |               |
| AF001553-cds30_at |        |         |         | SAV0875 | MW1419  |        |            | AP001553-cds30 | Sec-independent protein translocase TatC                                    | Protein fate                   | Protein and peptide secretion and trafficking        |               |
| WAN014C9I_at      | SA1764 |         | SAS1876 | SAV1953 | MW1893  |        |            |                | phi PVL ORF 52 homologue                                                    | Protein fate                   | Protein folding and stabilization                    |               |
| WAN01C4UE_at      | SAV197 |         |         | SAV1976 |         |        |            |                | phi PVL ORF 20 and 21 homologue                                             | Protein fate                   | Protein folding and stabilization                    |               |
| WAN014G5G_at      |        |         | SAR0990 | SAS0889 | SAV1020 | MW0901 | RF         |                | Staphylococcus aureus subsp. aureus GENE=="SAV1020""                        | Protein fate                   | Protein folding and stabilization                    |               |
| WAN014HPO_at      |        |         | SAR0228 |         |         |        |            |                | Staphylococcus aureus subsp. aureus Mu50 GENE=="SAV0397""                   | Protein synthesis              | Translation factors                                  |               |
| WAN014G2A_at      |        |         |         | SAV0397 |         |        |            |                | putative glutamine amidotransferase class I                                 | Protein synthesis              | tRNA aminoacylation                                  |               |
| WAN014G1U_at      | SAV085 |         | SAS0897 | SAV0851 |         |        |            |                | Helix-turn-helix domain protein                                             | Regulatory functions           | DNA interactions                                     |               |
| WAN014G8P_at      | SA2610 | SA2379  | SAR2673 | SAS2479 | SAV2593 | MW2513 |            |                | Helix-turn-helix domain protein                                             | Regulatory functions           | DNA interactions                                     |               |
| WAN014GEA_at      | SA2732 | SA2495  | SAS2588 | SAV2705 | MW2624  |        |            |                | transcriptional regulator, tetR family                                      | Regulatory functions           | DNA interactions                                     |               |
| WAN014GOF_at      | SA1804 |         | SAR2099 |         |         |        |            |                | transcriptional regulator, putative                                         | Regulatory functions           | DNA interactions                                     |               |
| WAN014GQN_at      |        |         | SA0890  |         |         |        |            |                | Helix-turn-helix domain protein                                             | Regulatory functions           | DNA interactions                                     |               |
| WAN014H2U_at      |        |         |         | SAV0664 | MW0064  |        |            |                | transcriptional regulator, Cro/C1 family                                    | Regulatory functions           | DNA interactions                                     |               |
| WAN014H3G_at      | SA0074 |         |         | SAV0666 | MW0066  |        |            |                | transcriptional regulator, LysR family                                      | Regulatory functions           | DNA interactions                                     |               |
| WAN014HFM_at      | SA0891 |         |         |         |         |        |            |                | transcriptional regulator, LysR family                                      | Regulatory functions           | DNA interactions                                     |               |
| WAN014HOZ_at      |        |         | SAR0097 |         |         |        |            |                | transcriptional regulator, putative                                         | Regulatory functions           | DNA interactions                                     |               |
| WAN014HWK_at      |        |         | SAR1332 |         |         |        |            |                | transcriptional regulator, TetR family, putative                            | Regulatory functions           | DNA interactions                                     |               |
| WAN014HX5_at      |        |         | SAR2451 |         |         |        |            |                | response regulator                                                          | Regulatory functions           | DNA interactions                                     |               |
| WAN014HYR_at      |        |         | SAR2593 |         |         |        |            |                | transcriptional regulator, TetR family, putative                            | Regulatory functions           | DNA interactions                                     |               |
| WAN014ILC_x_at    | SA0337 |         | SAS0325 | SAV0349 | MW0325  |        |            |                | transcriptional regulator, GntR family/amino transferase, class I, putative | Regulatory functions           | DNA interactions                                     |               |
| WAN01BTSR_x_at    |        |         | SAR0346 |         |         |        |            |                | Helix-turn-helix, putative                                                  | Regulatory functions           | DNA interactions                                     |               |
| WAN01BXBC_x_at    |        |         | SAS0325 | SAV0349 | MW0325  |        |            |                | transcriptional regulator, Cro/C1 family-related protein                    | Regulatory functions           | DNA interactions                                     |               |
| WAN014HJK_at      | SA0041 |         |         | SAV0044 |         |        |            | AB037671-cds29 | Helix-turn-helix, putative                                                  | Regulatory functions           | DNA interactions                                     |               |
| WAN014HJG_at      |        |         |         | SAV0031 |         |        |            | AF053771-cds1  | xylose repressor                                                            | Regulatory functions           | Other                                                |               |
| WAN014GGM_at      |        |         |         | SAV0004 |         |        |            |                | transcriptional regulator qacR                                              | Regulatory functions           | Other                                                |               |
| WAN014G3W_at      |        |         |         | SAV0004 |         |        |            |                | transcriptional regulator, Cro/C1 family                                    | Regulatory functions           | Other                                                |               |
| WAN014G4L_at      |        |         |         | SAV0786 | MW0747  |        |            |                | transcriptional regulator, Cro/C1 family                                    | Regulatory functions           | Other                                                |               |
| WAN014G2U_at      |        |         |         | SAV0884 |         |        |            |                | transcriptional regulator, Cro/C1 family                                    | Regulatory functions           | Other                                                |               |
| WAN014L7_at       |        |         |         | SAV0008 |         |        |            |                | Staphylococcus aureus subsp. aureus Mu50 GENE=="SAV0684""                   | Regulatory functions           | Other                                                |               |
| WAN014A7Y-seg1_at |        |         |         | SAV1998 |         |        |            |                | Staphylococcus aureus subsp. aureus Mu50 GENE=="SAV0008""                   | Regulatory functions           | Other                                                |               |
| WAN014A7Y-seg2_at |        |         | SAR2734 | SAS2540 | SAV2654 | MW2575 |            |                | Gram positive anchor domain protein                                         | Regulatory functions           | Other                                                |               |
| WAN014G5T1_at     | SA2524 |         | SAS2540 | SAV2654 | MW2575  |        |            |                | repressor homolog                                                           | Regulatory functions           | Other                                                |               |
| WAN014G5T2_at     |        |         |         | SAV2654 | MW2575  |        |            |                | serine-threonine rich antigen                                               | Regulatory functions           | Other                                                |               |
| WAN014G5T3_at     |        |         |         | SAV2654 | MW2575  |        |            |                | serine-threonine rich antigen                                               | Regulatory functions           | Other                                                |               |
| WAN014G5T4_at     |        |         |         | SAV2654 | MW2575  |        |            |                | transcriptional regulator, MarR family                                      | Regulatory functions           | Other                                                |               |
| WAN014GMD_at      | SA1833 |         |         | SAV2026 |         |        |            |                | transcription activator of competence development and sporula sir           | Regulatory functions           | Other                                                |               |
| WAN014GMF_at      | SAV199 |         |         | SAV1994 |         |        |            |                | anti repressor                                                              | Regulatory functions           | Other                                                |               |
| WAN014GTC_at      | SA1801 |         | SAR2096 |         |         |        |            |                | anti repressor                                                              | Regulatory functions           | Other                                                |               |
| WAN014GT1_at      |        |         | SAR1029 | SAS0991 | SAV1056 | MW0939 |            |                | transcriptional regulator                                                   | Regulatory functions           | Other                                                |               |
| WAN014GT2_at      |        |         | SAR0040 |         | SAV0042 | MW0032 | meCR       |                | transcriptional regulator                                                   | Regulatory functions           | Other                                                |               |
| WAN014HNU_at      | SA0039 |         | SAR0069 |         | SAV0071 |        |            |                | transcriptional regulator, KdpE                                             | Regulatory functions           | Other                                                |               |
| WAN014HNU_at      | SA0066 |         | SAR0068 |         | SAV0070 |        |            |                | transcription regulator protein kdpE                                        | Regulatory functions           | Other                                                |               |
| WAN014IOA_at      |        |         | SAR1926 |         |         |        |            |                | signal transduction protein TRAP                                            | Regulatory functions           | Other                                                |               |
| WAN01COU3_at      |        |         | SAR2468 | SAS2271 | SAV2381 | MW2301 |            |                | transcription regulatory protein                                            | Regulatory functions           | Other                                                |               |
| WAN01C8K6_at      | SA0079 |         | SAR0099 | SAS0059 | SAV0083 | MW0059 |            |                | transcription regulatory protein                                            | Regulatory functions           | Other                                                |               |
| WAN014H8I_at      |        |         |         | SAV0083 |         |        |            |                | Nitrogen regulation protein NIFR3                                           | Regulatory functions           | Other                                                |               |
| WAN014HNL_at      | SA0033 |         | SAR0033 |         | SAV0035 |        |            |                | sensor histidine kinase                                                     | Regulatory functions           | Protein interactions                                 |               |
| WAN014GK7_at      | SA1794 |         |         |         |         |        |            |                | kanamycin nucleotidyltransferase                                            | Transcription                  | Degradation of RNA                                   |               |
| WAN014FZM_at      |        |         | SAR1859 |         |         |        |            |                | RecT protein family                                                         | Transcription                  | Other                                                |               |
| WAN014HSO_at      |        |         | SAR0692 |         |         |        |            |                | Sigma-70 region 2 domain protein                                            | Transcription                  | Transcription factors                                |               |
| WAN014GLQ_at      |        |         | SAR0263 |         |         |        |            |                | Arsenate reductase (Arsenic pump modifier)                                  | Transport and binding proteins | Anions                                               |               |
| WAN014HIR_at      |        |         | SAR0724 |         |         |        |            | AB037671-cds19 | PTS system, IIA component                                                   | Transport and binding proteins | Carbohydrates, organic alcohols, and acids           |               |
| WAN014IO3_at      |        |         | SAR0632 | SAS0591 | SAV0624 | MW0587 | X93358     |                | Cadmium efflux system accessory protein homolog                             | Transport and binding proteins | Cations and iron carrying compounds                  |               |
| WAN014IRV_at      | SA0069 |         | SAR0070 |         | SAV0072 |        |            |                | Na+/H+ antiporter                                                           | Transport and binding proteins | Cations and iron carrying compounds                  |               |
| WAN014IUS_at      | SA0070 |         | SAR0071 |         | SAV0073 |        |            |                | K+-transporting ATPase, A subunit                                           | Transport and binding proteins | Cations and iron carrying compounds                  |               |
| WAN014IUC_at      | SA0071 |         |         |         | SAV0074 |        |            |                | K+-transporting ATPase, B subunit                                           | Transport and binding proteins | Cations and iron carrying compounds                  |               |
| WAN014IUC_at      |        |         |         |         | SAV0074 |        |            |                | K+-transporting ATPase, C subunit                                           | Transport and binding proteins | Cations and iron carrying compounds                  |               |
| WAN014IUC_at      |        |         | SAR0631 | SAS0590 | SAV0623 | MW0586 | ubiquinone |                | Na+/H+ antiporter                                                           | Transport and binding proteins | Cations and iron carrying compounds                  |               |
| WAN014IUC_at      |        |         | SAR0635 | SAS0594 | SAV0627 | MW0590 |            |                | Na+/H+ antiporter                                                           | Transport and binding proteins | Cations and iron carrying compounds                  |               |
| WAN014IUC_at      |        |         | SAR0723 |         |         |        |            |                | cadmium-translocating P-type ATPase                                         | Transport and binding proteins | Cations and iron carrying compounds                  |               |
| WAN014IPD_at      | SA2291 |         |         | SAV2503 |         |        |            |                | Staphylococcus aureus subsp. aureus N315 genomic DNA                        | Transport and binding proteins | Other                                                |               |
|                   |        |         |         |         |         |        |            |                | Fibronectin-binding protein precursor (FNBP)                                | Transport and binding proteins | Other                                                |               |

| Systematic        | COL     | N315    | MRSA    | MSSA    | Mu50    | MW2    | GENE NAME   | GenBank ID | GenBank Desc.                                                                        | Protein Function                                                             | TIGR Main Role                 | TIGR Sub Role                  |
|-------------------|---------|---------|---------|---------|---------|--------|-------------|------------|--------------------------------------------------------------------------------------|------------------------------------------------------------------------------|--------------------------------|--------------------------------|
| WAN0141PF_at      |         | SA2290  |         |         |         |        |             | SAV2502    | Staphylococcus aureus subsp. aureus N315 genomic DNA                                 | fibronectin-binding protein B                                                | Transport and binding proteins | Other                          |
| WAN014G4U_at      | SA2523  |         |         |         |         |        |             |            | drug transporter, putative                                                           | Transport and binding proteins                                               | Other                          |                                |
| WAN014G4U_at      | SA00002 |         |         |         |         |        |             |            | tetracycline resistance protein                                                      | Transport and binding proteins                                               | Other                          |                                |
| WAN014FT0_at      |         | SA0192  |         | SAS0173 | SAV0198 | MW0172 | tetK        |            | ABC transporter ATP-binding protein                                                  | Transport and binding proteins                                               | Unknown substrate              |                                |
| WAN014FT3_at      |         | SA0197  |         | SAS0178 | SAV0203 | MW0178 | III         |            | ABC transporter ATP-binding protein                                                  | Transport and binding proteins                                               | Unknown substrate              |                                |
| WAN014GRM_at      | SA0070  |         |         | SAS0062 |         | MW0062 |             |            | permease, putative                                                                   | Transport and binding proteins                                               | Unknown substrate              |                                |
| WAN014GV2_at      | SA0422  | SA0339  | SAR0348 | SAS0327 | SAV0351 | MW0327 |             |            | ABC transporter, ATP-binding protein                                                 | Transport and binding proteins                                               | Unknown substrate              |                                |
| WAN014H01_at      |         |         | SAR0094 |         |         |        |             |            | multidrug resistance protein (efflux transporter)                                    | Transport and binding proteins                                               | Unknown substrate              |                                |
| WAN014HSF_at      |         |         | SAR0672 |         |         |        |             |            | ABC transporter, permease protein                                                    | Transport and binding proteins                                               | Unknown substrate              |                                |
| WAN014HXP_at      |         |         | SAR2544 |         |         |        |             |            | ABC transporter, ATP-binding protein                                                 | Transport and binding proteins                                               | Unknown substrate              |                                |
| WAN014HYH_at      |         |         | SAR2452 |         |         |        |             |            | ABC transporter, ATP-binding protein                                                 | Transport and binding proteins                                               | Unknown substrate              |                                |
| WAN014HY1_at      |         |         | SAR2453 |         |         |        |             |            | ABC transporter efflux protein, DrrB family, putative                                | Transport and binding proteins                                               | Unknown substrate              |                                |
| WAN014HW1_at      |         | SA2013  |         |         |         |        |             | SAV2212    | transposase, degenerate                                                              | transposase, degenerate                                                      | transposase, degenerate        |                                |
| WAN01CASK_X_at    |         | SA1823  |         |         |         |        |             | SAV1805    | transposase, degenerate                                                              | transposase, degenerate                                                      | transposase, degenerate        |                                |
| WAN014HH1_at      |         |         |         |         |         | MW1379 |             |            | LukS-PV                                                                              | Unclassified                                                                 | Role category not yet assigned |                                |
| WAN014HH2_at      |         |         |         |         |         | MW1378 |             |            | LukF-PV                                                                              | Unclassified                                                                 | Role category not yet assigned |                                |
| WAN014GL7_at      |         | SAR2048 |         |         |         |        |             |            | Staphylococcus aureus (strain:ATCC49775) DNA.                                        | Unclassified                                                                 | Role category not yet assigned |                                |
| WAN014GL7_at      |         |         |         |         |         |        |             |            | Staphylococcus aureus (strain:ATCC49775) DNA.                                        | Unclassified                                                                 | Role category not yet assigned |                                |
| WAN014GL7_at      |         |         |         |         |         |        |             |            | Staphylococcus aureus (strain:ATCC49775) DNA.                                        | Unclassified                                                                 | Role category not yet assigned |                                |
| WAN014HTT1_at     |         | SA1964  |         |         |         | MW2087 |             |            | bacteriophage phi PVL (specific_host:Staphylococcus aureus ATCC 49775) proviral DNA. | 770RF02                                                                      | Role category not yet assigned |                                |
| WAN014HGI_at      |         | SA0046  |         |         | SAV2160 |        |             |            | FmbB protein                                                                         | Unclassified                                                                 | Role category not yet assigned |                                |
| WAN014HGJ_at      |         | SA0045  | SAR0047 |         | SAV0048 |        |             |            | Staphylococcus aureus (strain:85/2082) DNA.                                          | Unclassified                                                                 | Role category not yet assigned |                                |
| WAN014HIX_at      |         | SA0044  | SAR0046 |         | SAV0047 |        |             |            | Staphylococcus aureus (strain:85/2082) DNA.                                          | Unclassified                                                                 | Role category not yet assigned |                                |
| WAN014HY2_at      |         | SA0043  |         |         | SAV0046 |        |             |            | Staphylococcus aureus (strain:85/2082) DNA.                                          | Unclassified                                                                 | Role category not yet assigned |                                |
| WAN01CASW_s_at    |         | SA0766  | SAR1735 |         | SAV1655 |        | ORF2        |            | Staphylococcus aureus (strain:85/2082) DNA.                                          | Unclassified                                                                 | Role category not yet assigned |                                |
| WAN014HL1_at      |         |         |         |         | SAV0302 |        |             |            | Gene.qacB:Product:multidrug efflux protein QacB                                      | Antiseptic resistance protein                                                | Role category not yet assigned |                                |
| WAN014HIN_at      |         |         |         |         | SAV0303 |        |             |            | Gene:Product:delta-orf186;Note:truncated by IS257 insertion                          | delta-orf186                                                                 | Role category not yet assigned |                                |
| WAN014HJM_at      |         |         | SAR0385 |         | SAV0303 |        |             |            | Gene:Product:Orf3                                                                    | putative membrane protein                                                    | Role category not yet assigned |                                |
| WAN01BJUJ_at      |         |         | SAR2070 |         |         |        |             |            | AP001553-cds36                                                                       | bacteriophage phi ETA (specific_host:Staphylococcus aureus E-1) DNA.         | 770RF031                       | Role category not yet assigned |
| WAN014K11_at      |         |         | SAS1928 |         | SAV0803 | MW1945 | III         |            | Staphylococcus aureus subsp. aureus Mu50 GENE=""SAV0803""                            | feric hydroxamate receptor 1                                                 | Unclassified                   | Role category not yet assigned |
| WAN014IS8_at      |         |         |         |         | SAV0855 |        |             |            | anti-repressor                                                                       | Unclassified                                                                 | Role category not yet assigned |                                |
| WAN014G4D_at      |         |         |         |         | SAV0865 |        |             |            | Staphylococcus aureus subsp. aureus Mu50 GENE=""SAV0865""                            | unnamed protein product: orf36.1                                             | Unclassified                   | Role category not yet assigned |
| WAN014G4E_at      |         |         |         |         | SAV0868 |        |             |            | Staphylococcus aureus subsp. aureus Mu50 GENE=""SAV0868""                            | 770RF016                                                                     | Role category not yet assigned |                                |
| WAN014G4H_at      |         |         |         |         | SAV0872 |        |             |            | Staphylococcus aureus subsp. aureus Mu50 GENE=""SAV0872""                            | 770RF028                                                                     | Role category not yet assigned |                                |
| WAN014G4I_at      |         |         |         |         | SAV0890 |        |             |            | Staphylococcus aureus subsp. aureus Mu50 GENE=""SAV0890""                            | G4H0353p                                                                     | Role category not yet assigned |                                |
| WAN014L11_at      |         |         |         |         | SAV0881 |        |             |            | Staphylococcus aureus subsp. aureus Mu50 GENE=""SAV0881""                            | 770RF031                                                                     | Role category not yet assigned |                                |
| WAN014G4O_at      |         |         |         |         | SAV0890 |        | KSHV        |            | Staphylococcus aureus subsp. aureus Mu50 GENE=""SAV0890""                            | phi Mu50B-like protein                                                       | Unclassified                   | Role category not yet assigned |
| WAN014W1_at       |         | SAV089  |         |         | SAV0893 |        |             |            | Staphylococcus aureus subsp. aureus Mu50 GENE=""SAV0893""                            | phi Mu50B-like protein                                                       | Unclassified                   | Role category not yet assigned |
| WAN014IRS_at      |         | SAV089  |         |         | SAV0897 |        |             |            | Staphylococcus aureus subsp. aureus Mu50 GENE=""SAV0897""                            | phi Mu50B-like protein                                                       | Unclassified                   | Role category not yet assigned |
| WAN014IRI_at      |         | SAV090  |         |         | SAV0900 |        |             |            | Staphylococcus aureus subsp. aureus Mu50 GENE=""SAV0900""                            | unknown phi protein                                                          | Unclassified                   | Role category not yet assigned |
| WAN014IRO_at      |         | SAV090  |         |         | SAV0902 |        |             |            | Staphylococcus aureus subsp. aureus Mu50 GENE=""SAV0902""                            | phi ETA of 54-like protein                                                   | Unclassified                   | Role category not yet assigned |
| WAN014IRN_at      |         | SAV090  |         |         | SAV0903 |        |             |            | Staphylococcus aureus subsp. aureus Mu50 GENE=""SAV0903""                            | phi ETA of 55-like protein                                                   | Unclassified                   | Role category not yet assigned |
| WAN014G4S_at      |         |         |         |         | SAV0905 |        |             |            | Staphylococcus aureus subsp. aureus Mu50 GENE=""SAV0905""                            | phiETA ORF57-like protein                                                    | Unclassified                   | Role category not yet assigned |
| WAN014IRK_at      |         | SAV090  |         |         | SAV0906 |        |             |            | Staphylococcus aureus subsp. aureus Mu50 GENE=""SAV0906""                            | phi105 orf 44-like protein                                                   | Unclassified                   | Role category not yet assigned |
| WAN014GGC_at      |         |         |         |         | SAV0903 |        |             |            | Staphylococcus aureus subsp. aureus Mu50 GENE=""SAV0903""                            | MobA/MobL family family                                                      | Unclassified                   | Role category not yet assigned |
| WAN01C5GK_at      |         |         |         |         | SAV0206 |        | M18086-cds3 |            | Staphylococcus aureus (strain SK982) DNA.                                            | Bifunctional AAC/APH [Includes: 6-aminocyclohexyl N-acetyltransferase(EC 2.3 | Unclassified                   | Role category not yet assigned |
| WAN014G4C_at      |         |         |         |         | SAV0864 |        | SSB         |            | Staphylococcus aureus subsp. GENE=""SAV0864""                                        | Single-strand binding protein 1 (SSB 1) (Helix-destabilizing protein1)       | Unclassified                   | Role category not yet assigned |
| WAN014GZ2_at      |         |         |         |         | SAV0300 |        | HIN         |            | Staphylococcus aureus subsp. aureus Mu50 GENE=""truncated-res""                      | Res4                                                                         | Unclassified                   | Role category not yet assigned |
| US3688-cds1_X_at  |         |         |         |         | SAV2010 |        |             |            | Gene:Product:Note:orf1                                                               | Ear                                                                          | Unclassified                   | Role category not yet assigned |
| WAN01BJUL_at      |         |         |         |         | SAV2011 |        |             |            | Gene:Product:Note:binL (AA 1-197)                                                    | DNA-invertase                                                                | Unclassified                   | Role category not yet assigned |
| WAN014A7Q-seg1_at |         | SA1577  | SAR1828 |         | SAV1758 |        |             |            | X52734-cds3                                                                          | fmbB-like protein                                                            | Unclassified                   | Role category not yet assigned |
| WAN014FS0_at      |         |         |         |         | SAV0043 |        |             |            |                                                                                      | Far1                                                                         | Unclassified                   | Role category not yet assigned |
| WAN014FSP_at      |         |         |         |         | SAV0034 |        |             |            |                                                                                      | putative membrane protein                                                    | Unclassified                   | Role category not yet assigned |
| WAN014FSZ_at      |         | SA0191  |         |         | SAV0197 | MW0171 |             |            | SA0191/BacG-like protein                                                             | Unclassified                                                                 | Role category not yet assigned |                                |
| WAN014FT1_at      |         | SA0193  |         |         | SAV0196 | MW0174 |             |            | Enterococcus faecalis plasmid pPD1 bacI                                              | Unclassified                                                                 | Role category not yet assigned |                                |
| WAN014FUB_at      |         | SA0394  |         |         | SAV0434 |        |             |            | Gram-positive signal peptide, YSIRK family domain protein                            | Unclassified                                                                 | Role category not yet assigned |                                |
| WAN014FUC_at      |         |         |         |         | SAV0397 | MW0395 |             |            | Gram-positive signal peptide, YSIRK family domain protein                            | Unclassified                                                                 | Role category not yet assigned |                                |
| WAN014FY1_at      |         | SA0059  | SAR0061 |         | SAV0063 |        |             |            | unnamed protein product: ORF13                                                       | Unclassified                                                                 | Role category not yet assigned |                                |
| WAN014G1A_at      |         | SAV040  |         |         | SAV0400 |        | pX02        |            | TN918 ORF14 and to L. monocytogenes P60 protein homolog                              | Imo111                                                                       | Unclassified                   | Role category not yet assigned |
| WAN014G1B_at      |         | SAV041  |         |         | SAV0412 |        |             |            | uncharacterized conserved protein CAC1439                                            | Unclassified                                                                 | Role category not yet assigned |                                |
| WAN014G1M_at      |         | SAV041  |         |         | SAV0413 |        |             |            | UvrD/REP helicase domain protein                                                     | Unclassified                                                                 | Role category not yet assigned |                                |
| WAN014G2H_at      |         | SA0399  |         |         | SAV0439 |        |             |            | Staphylococcus tandem lipoproteins subfamily                                         | Unclassified                                                                 | Role category not yet assigned |                                |
| WAN014G7V_at      |         | SA1633  |         |         | SAV1815 |        |             |            | Ear                                                                                  | Unclassified                                                                 | Role category not yet assigned |                                |
| WAN014GB1_at      |         |         |         |         | SAV2516 | MW2551 | dfB         |            | clumping factor B                                                                    | Unclassified                                                                 | Role category not yet assigned |                                |
| WAN014GB2_at      |         | SAR2531 |         |         | SAV2441 |        |             |            | fmbA-like protein                                                                    | Unclassified                                                                 | Role category not yet assigned |                                |
| WAN014G19_X_at    |         | SAR2471 |         |         |         |        |             |            | transposase                                                                          | Unclassified                                                                 | Role category not yet assigned |                                |
| WAN014GLB_at      |         | SA1765  | SAR2049 |         | SAV1954 |        |             |            | 770RF004                                                                             | Unclassified                                                                 | Role category not yet assigned |                                |
| WAN014G00_at      |         | SA0281  |         |         | SAV0293 | MW0268 |             |            | YeeE                                                                                 | Unclassified                                                                 | Role category not yet assigned |                                |
| WAN014G09_X_at    |         |         |         |         | SAV0912 |        |             |            | 770RF050                                                                             | Unclassified                                                                 | Role category not yet assigned |                                |
| WAN014G0C_at      |         |         |         |         | SAV0752 | MW0764 |             |            | clumping factor                                                                      | Unclassified                                                                 | Role category not yet assigned |                                |
| WAN014HAZ_at      |         |         | SAR0602 |         |         |        |             |            | putative membrane protein                                                            | Unclassified                                                                 | Role category not yet assigned |                                |
| WAN014HT0_at      |         | SA0095  |         |         | SAV0099 |        |             |            | Staphylococcus tandem lipoproteins subfamily                                         | Unclassified                                                                 | Role category not yet assigned |                                |
| WAN014HEK_at      |         | SA0743  |         |         | SAV0812 |        |             |            | secreted von Willebrand factor-binding protein                                       | Unclassified                                                                 | Role category not yet assigned |                                |
| WAN014HLA_at      |         | SA0074  | SAR0076 |         | SAV0078 |        |             |            | unnamed protein product: ORF N009                                                    | Unclassified                                                                 | Role category not yet assigned |                                |
| WAN014HLB_at      |         | SA0073  | SAR0074 |         | SAV0076 |        |             |            | unnamed protein product: ORF N010                                                    | Unclassified                                                                 | Role category not yet assigned |                                |
| WAN014HLD_at      |         | SA0065  | SAR1144 | SAS1104 | SAV0069 | MW1052 |             |            | conserved hypothetical protein SA0065                                                | Unclassified                                                                 | Role category not yet assigned |                                |
| WAN014HLH_at      |         | SA0056  | SAR0058 |         | SAV0060 |        |             |            | unnamed protein product: ORF17                                                       | Unclassified                                                                 | Role category not yet assigned |                                |
| WAN014HNM_at      |         | SA0042  |         |         | SAV0045 |        | putative    |            | unnamed protein product: ORF7                                                        | Unclassified                                                                 | Role category not yet assigned |                                |
| WAN014HNP_at      |         | SA0061  | SAR0063 |         | SAV0065 |        |             |            | unnamed protein product: ORF11                                                       | Unclassified                                                                 | Role category not yet assigned |                                |
| WAN014HNZ_at      |         | SA0072  | SAR0074 |         | SAV0075 |        |             |            | unnamed protein product: ORF13                                                       | Unclassified                                                                 | Role category not yet assigned |                                |
| WAN014HNW_at      |         |         | SAR0092 |         |         |        |             |            | Ren71, putative                                                                      | Unclassified                                                                 | Role category not yet assigned |                                |
| WAN014HNX_at      |         |         | SAR0093 |         |         |        |             |            | putative membrane protein                                                            | Unclassified                                                                 | Role category not yet assigned |                                |
| WAN014HO1_at      |         |         | SAR0367 |         |         |        |             |            | DNA-binding protein                                                                  | Unclassified                                                                 | Role category not yet assigned |                                |
| WAN014HP3_at      |         |         | SAR0638 |         |         |        |             |            | putative membrane protein                                                            | Unclassified                                                                 | Role category not yet assigned |                                |
| WAN014HO2_at      |         |         | SAR0256 |         |         |        |             |            | putative membrane protein                                                            | Unclassified                                                                 | Role category not yet assigned |                                |
| WAN014HO9_at      |         |         | SAR1288 |         |         |        |             |            | putative lipoprotein                                                                 | Unclassified                                                                 | Role category not yet assigned |                                |
| WAN014HRJ_at      |         |         | SAR1535 |         |         |        |             |            | 770RF030                                                                             | Unclassified                                                                 | Role category not yet assigned |                                |
| WAN014HRM_at      |         |         | SAR1554 |         |         |        |             |            | 770RF023                                                                             | Unclassified                                                                 | Role category not yet assigned |                                |
| WAN014HRP_at      |         |         | SAR1555 |         |         |        |             |            | 770RF077                                                                             | Unclassified                                                                 | Role category not yet assigned |                                |
| WAN014HTV_at      |         |         | SAR1896 |         |         |        |             |            | putative exported protein                                                            | Unclassified                                                                 | Role category not yet assigned |                                |
| WAN014HTZ_at      |         |         | SAR1889 |         |         |        |             |            | putative exported protein                                                            | Unclassified                                                                 | Role category not yet assigned |                                |
| WAN014HU0_at      |         |         | SAR1890 |         |         |        |             |            | putative exported protein                                                            | Unclassified                                                                 | Role category not yet assigned |                                |
| WAN014HU6_at      |         |         | SAR1894 |         |         |        |             |            | putative exported protein                                                            | Unclassified                                                                 | Role category not yet assigned |                                |
| WAN014HUJ_at      |         | SA1768  | SAR2054 |         | SAV1957 |        |             |            | 770RF020                                                                             | Unclassified                                                                 | Role category not yet assigned |                                |
| WAN014HUK_at      |         | SA1773  | SAR2060 |         | SAV1962 |        |             |            | 770RF045                                                                             | Unclassified                                                                 | Role category not yet assigned |                                |
| WAN014HV0_at      |         | SA1774  | SAR2061 |         | SAV1963 |        |             |            | 770RF006                                                                             | Unclassified                                                                 | Role category not yet assigned |                                |
| WAN014HV5_at      |         | SA1780  | SAR2067 |         | SAV1969 |        |             |            | 770RF026                                                                             | Unclassified                                                                 | Role category not yet assigned |                                |
| WAN014HV6_at      |         |         | SAR1131 |         |         |        |             |            | putative exported protein                                                            | Unclassified                                                                 | Role category not yet assigned |                                |
| WAN014HW1_at      |         |         | SAR2260 |         |         |        |             |            | hypothetical protein, similar to BAB43261.1 of S. aureus N315                        | Unclassified                                                                 | Role category not yet assigned |                                |
| WAN014HX3_at      |         | SA2704  | SAR1556 |         |         |        |             |            | 770RF011                                                                             | Unclassified                                                                 | Role category not yet assigned |                                |
| WAN014HXJ_at      |         |         | SAR1911 |         |         |        |             |            | putative exported protein                                                            | Unclassified                                                                 | Role category not yet assigned |                                |
| WAN014HYS_at      |         |         | SAR2788 |         |         |        |             |            | putative exported protein                                                            | Unclassified                                                                 | Role category not yet assigned |                                |
| WAN014HYV_at      |         |         | SAR2789 |         |         |        |             |            | SprC                                                                                 | Unclassified                                                                 | Role category not yet assigned |                                |
| WAN014HW_at       |         | SA1770  |         |         | SAV1959 |        |             |            | 770RF029                                                                             | Unclassified                                                                 | Role category not yet assigned |                                |

| Systematic        | COL | N315   | MRSA    | MSSA    | Mu50    | MW2     | GENE NAME | GenBank ID | GenBank Desc. | Protein Function                                                    | TIGR Main Role   | TIGR Sub Role                  |
|-------------------|-----|--------|---------|---------|---------|---------|-----------|------------|---------------|---------------------------------------------------------------------|------------------|--------------------------------|
| WAN014IKK_x_at    |     |        |         | SAS0905 |         |         |           |            |               | phi PVL orf 39-like protein                                         | Unclassified     | Role category not yet assigned |
| WAN014IKT_at      |     | SA0398 |         |         | SAV0438 |         | lpl3      |            |               | Staphylococcus tandem lipoproteins subfamily                        | Unclassified     | Role category not yet assigned |
| WAN014IKU_at      |     | SA0400 |         |         | SAV0440 |         |           |            |               | Staphylococcus tandem lipoproteins subfamily                        | Unclassified     | Role category not yet assigned |
| WAN014IKV_at      |     | SA0401 |         |         | SAV0441 |         |           |            |               | Staphylococcus tandem lipoproteins subfamily                        | Unclassified     | Role category not yet assigned |
| WAN014IKW_at      |     | SA0402 |         |         | SAV0442 |         |           |            |               | Staphylococcus tandem lipoproteins subfamily                        | Unclassified     | Role category not yet assigned |
| WAN014ILB_at      |     | SA1818 |         |         | SAV2010 |         |           |            |               | Staphylococcus tandem lipoproteins subfamily                        | Unclassified     | Role category not yet assigned |
| WAN014IMB_at      |     |        |         | SAS0915 |         |         |           |            |               | 77ORF030                                                            | Unclassified     | Role category not yet assigned |
| WAN014IMC_x_at    |     | SA0403 |         |         |         |         |           |            |               | Staphylococcus tandem lipoproteins subfamily                        | Unclassified     | Role category not yet assigned |
| WAN014INW_x_at    |     | SA0397 |         |         | SAV0437 |         | lpl2      |            |               | Staphylococcus tandem lipoproteins subfamily                        | Unclassified     | Role category not yet assigned |
| WAN014INY_at      |     | SA0396 |         |         |         |         |           |            |               | Staphylococcus tandem lipoproteins subfamily                        | Unclassified     | Role category not yet assigned |
| WAN014IO1_at      |     | SA0405 |         |         | SAV0445 |         |           |            |               | Staphylococcus tandem lipoproteins subfamily                        | Unclassified     | Role category not yet assigned |
| WAN014IOS_at      |     |        | SAR0671 |         |         |         |           |            |               | ABC transporter ATP-binding protein                                 | Unclassified     | Role category not yet assigned |
| WAN014IOL_at      |     | SA2389 |         |         | SAV2596 |         |           |            |               | glutamyl-endopeptidase                                              | Unclassified     | Role category not yet assigned |
| WAN014IOM_at      |     | SA2382 |         |         | SAV2596 |         |           |            |               | glutamyl-endopeptidase                                              | Unclassified     | Role category not yet assigned |
| WAN014ITC_at      |     |        | SAR1539 | SAS0911 |         | MW1423  |           |            |               | PVL orf 50-like protein                                             | Unclassified     | Role category not yet assigned |
| WAN014ITD_at      |     |        | SAR1540 | SAS0910 |         | MW1424  |           |            |               | ETA orf 26-like protein-related protein                             | Unclassified     | Role category not yet assigned |
| WAN014ITH_at      |     |        | SAR1543 | SAS0907 |         | MW1427  |           |            |               | phi APSE P51-like protein                                           | Unclassified     | Role category not yet assigned |
| WAN014ITO_s_at    |     | SA0107 |         | SAS0085 | SAV0111 | MW0084  |           |            |               | protein A                                                           | Unclassified     | Role category not yet assigned |
| WAN014IU1_at      |     |        | SAR1305 |         |         |         |           |            |               | transposase                                                         | Unclassified     | Role category not yet assigned |
| WAN014IU2_at      |     | SA0047 | SAR1734 |         | SAV0050 |         |           |            |               | unnamed protein product: ORF N050                                   | Unclassified     | Role category not yet assigned |
| WAN014IWJ_s_at    |     | SA0222 |         |         |         |         |           |            |               | staphylocoagulase precursor [imported]                              | Unclassified     | Role category not yet assigned |
| WAN014IX2_at      |     | SA0745 |         | SAS0755 | SAV0814 | MW0768  |           |            |               | secreted von Willebrand factor-binding protein                      | Unclassified     | Role category not yet assigned |
| WAN014IX4_at      |     |        | SAR0846 |         |         |         |           |            |               | putative exported protein                                           | Unclassified     | Role category not yet assigned |
| WAN014IXK_at      |     |        | SAR1533 |         |         |         |           |            |               | phi PV83 orf 27-like protein                                        | Unclassified     | Role category not yet assigned |
| WAN014IYC_x_at    |     |        | SAR2471 |         |         |         |           |            |               | transposase                                                         | Unclassified     | Role category not yet assigned |
| WAN014A5A_s_at    |     |        |         |         | SAV0894 |         |           |            |               | phi Mu50B-like protein                                              | Unclassified     | Role category not yet assigned |
| WAN014A5R_s_at    |     |        |         |         | SAV0893 |         |           |            |               | phi Mu50B-like protein                                              | Unclassified     | Role category not yet assigned |
| WAN014A5I_s_at    |     |        |         |         | SAV0898 |         |           |            |               | phi Mu50B-like protein                                              | Unclassified     | Role category not yet assigned |
| WAN014A7Z_s_at    |     |        |         |         | SAV0894 |         |           |            |               | phi Mu50B-like protein                                              | Unclassified     | Role category not yet assigned |
| WAN014A7Z2_s_at   |     |        |         |         | SAV0888 |         |           |            |               | phi Mu50B-like protein                                              | Unclassified     | Role category not yet assigned |
| WAN014BTJF_at     |     |        | SAR0838 |         |         |         |           |            |               | putative membrane protein                                           | Unclassified     | Role category not yet assigned |
| WAN014BU2B_s_at   |     |        | SAR1501 | SAS0950 |         | MW1384  |           |            |               | SLT orf 129-like protein                                            | Unclassified     | Role category not yet assigned |
| WAN014BU2C_at     |     |        | SAR1532 |         |         |         |           |            |               | phi PVL ORF 52 homologue                                            | Unclassified     | Role category not yet assigned |
| WAN014BUCJ_at     |     |        | SAR1861 |         |         |         |           |            |               | putative membrane protein                                           | Unclassified     | Role category not yet assigned |
| WAN014BUDD_at     |     |        | SAR1893 |         |         |         |           |            |               | putative exported protein                                           | Unclassified     | Role category not yet assigned |
| WAN014BUDU_at     |     |        | SAR1910 |         |         |         |           |            |               | putative membrane protein                                           | Unclassified     | Role category not yet assigned |
| WAN014BUJK_at     |     |        | SAR2119 |         | SAV2032 | MW1956  |           |            |               | serine-aspartate repeat protein                                     | Unclassified     | Role category not yet assigned |
| WAN014BUJL_at     |     |        | SAR2493 | SAS2294 | SAV2403 | MW2325  | formate   |            |               | NirC protein                                                        | Unclassified     | Role category not yet assigned |
| WAN014BUWJ_at     |     |        | SAR2562 |         |         |         |           |            |               | putative membrane protein                                           | Unclassified     | Role category not yet assigned |
| WAN014BUWU_at     |     |        | SAR2563 |         |         |         |           |            |               | putative membrane protein                                           | Unclassified     | Role category not yet assigned |
| WAN014BV1L_at     |     |        | SAR2718 |         |         |         |           |            |               | putative exported protein                                           | Unclassified     | Role category not yet assigned |
| WAN014BXF6_at     |     |        |         | SAS0520 |         | MW0517  | sdrD      |            |               | sdrD protein                                                        | Unclassified     | Role category not yet assigned |
| WAN014Z4I_at      |     |        | SAR1828 |         |         |         |           |            |               | DNA-invertase                                                       | Unclassified     | Role category not yet assigned |
| WAN014BZVA_at     |     |        | SAR0997 | SAS0960 | SAV1028 | MW0908  | lplA      |            |               | lipotein-protein ligase-like protein                                | Unclassified     | Role category not yet assigned |
| WAN014C1RM_at     |     |        | SAR2091 |         |         |         |           |            |               | putative exported protein                                           | Unclassified     | Role category not yet assigned |
| WAN014C3JL_at     |     |        | SA0054  |         | SAV0058 |         | D86934    |            |               | unnamed protein product: ORF N043                                   | Unclassified     | Role category not yet assigned |
| WAN014C3JM_at     |     |        | SA0055  |         | SAV0059 |         |           |            |               | unnamed protein product: ORF19                                      | Unclassified     | Role category not yet assigned |
| WAN014C3JZ_at     |     |        | SA0060  | SAR0062 |         | SAV0064 |           |            |               | unnamed protein product: ORF12                                      | Unclassified     | Role category not yet assigned |
| WAN014G7L_at      |     | SA2583 | SA2355  |         | SAS2454 | SAV2568 | MW2489    |            |               | acetyltransferase, GNAT family                                      | Unknown function | Enzymes of unknown specificity |
| WAN014GBU_at      |     | SA0046 |         |         |         |         |           |            |               | metallo-beta-lactamase family protein                               | Unknown function | Enzymes of unknown specificity |
| WAN014GEF_at      |     | SA2612 | SA2380  | SAR2674 | SAS2480 | SAV2594 | MW2514    |            |               | hydrolase, CocE/NonD family                                         | Unknown function | Enzymes of unknown specificity |
| WAN014GOW_at      |     |        | SA1806  | SAR2101 |         |         |           |            |               | exonuclease, putative                                               | Unknown function | Enzymes of unknown specificity |
| WAN014GQR_at      |     | SA0908 |         |         |         |         |           |            |               | beta-lactamase, putative                                            | Unknown function | Enzymes of unknown specificity |
| WAN014H0L_at      |     | SA0064 |         | SAS0083 |         | SAV0087 | MW0057    |            |               | metallo-beta-lactamase family protein                               | Unknown function | Enzymes of unknown specificity |
| WAN014HTI_at      |     |        | SAR0824 |         |         |         |           |            |               | malate oxidoreductase                                               | Unknown function | Enzymes of unknown specificity |
| WAN014HUX_at      |     |        | SAS1930 |         |         | MW1947  |           |            |               | Acetyltransferase (GNAT) family                                     | Unknown function | Enzymes of unknown specificity |
| WAN014ILJ_at      |     | SA2541 | SAR2609 | SAS2415 |         | MW2449  |           |            |               | acetyltransferase, GNAT family                                      | Unknown function | Enzymes of unknown specificity |
| WAN014IOE_at      |     |        | SAR2779 |         |         |         |           |            |               | N-acetyltransferase family protein                                  | Unknown function | Enzymes of unknown specificity |
| WAN014FSR_at      |     |        |         | SAS0046 |         |         |           |            |               | glyoxalase family protein, putative                                 | Unknown function | General                        |
| WAN014GDZ_at      |     | SA2716 | SA2484  |         | SAV2692 |         |           |            |               | 30S ribosomal protein S14 homolog-related                           | Unknown function | General                        |
| WAN014GNM_at      |     |        | SAR0284 |         |         |         |           |            |               | diarrheal toxin                                                     | Unknown function | General                        |
| WAN014H9H_at      |     |        | SAR0639 |         | SAV0674 | MW0636  |           |            |               | Protein of unknown function (DUF456) superfamily                    | Unknown function | General                        |
| WAN014H0I_at      |     |        | SAR0368 |         |         |         |           |            |               | DNA binding domain, excisionase family protein, putative            | Unknown function | General                        |
| WAN014HT2_at      |     |        | SAR0721 |         |         |         |           |            |               | multicopper oxidase domain protein                                  | Unknown function | General                        |
| WAN014HTX_at      |     |        | SAR1885 |         |         |         |           |            |               | Domain of unknown function (DUF955) family                          | Unknown function | General                        |
| WAN014HXW_at      |     |        | SAR2591 |         |         |         |           |            |               | LysE/YggA family protein                                            | Unknown function | General                        |
| WAN014I21_at      |     | SA2142 |         |         |         |         |           |            |               | SAP domain protein                                                  | Unknown function | General                        |
| WAN014I4N_at      |     | SA2195 | SA2004  |         |         |         |           |            |               | M23/M37 peptidase domain protein                                    | Unknown function | General                        |
| WAN014I52_at      |     | SA2203 |         |         |         |         |           |            |               | CipA-related protein                                                | Unknown function | General                        |
| WAN014IPV_at      |     |        | SA0761  | SAR0865 | SAS0774 | SAV0834 | MW0787    |            |               | conserved protein, ortholog YwqG B. subtilis                        | Unknown function | General                        |
| WAN014IR0_at      |     |        | SAR2717 |         |         |         |           |            |               | immunodominant antigen B                                            | Unknown function | General                        |
| WAN014ISR-seg2_at |     | SA0379 | SAR1507 | SAS0944 |         | MW1390  |           |            |               | bacteriophage L54a, M23/M37 peptidase domain protein                | Unknown function | General                        |
| WAN014ISV_at      |     | SA0376 | SAR1510 | SAS0941 |         | MW1392  |           |            |               | bacteriophage L54a, bacterial ts-like domain group 2 family protein | Unknown function | General                        |
| WAN014IX5_at      |     | SA2015 |         |         |         | MW1951  |           |            |               | integrase/recombinase-related protein, authentic frameshift         | Unknown function | General                        |
| WAN014BUCK_at     |     |        | SAR1862 |         |         |         |           |            |               | abortive infection protein family                                   | Unknown function | General                        |
| WAN014BUCI_at     |     |        | SAR1863 | SAS0035 |         |         |           |            |               | abortive infection protein family                                   | Unknown function | General                        |
| WAN014BXOW_at     |     |        |         | SAS1911 | SAV1991 | MW1928  |           |            |               | unnamed protein product: ORF12                                      | Unknown function | General                        |
| WAN014CAXR_at     |     | SA1799 | SAR2092 |         |         |         |           |            |               | Domain of unknown function (DUF771) superfamily                     | Unknown function | General                        |
| WAN014HF5_at      |     |        |         |         |         |         |           |            |               |                                                                     |                  |                                |
| WAN014IN2_at      |     |        |         |         |         |         |           |            |               |                                                                     |                  |                                |
| WAN014HFU_at      |     |        |         |         |         |         |           |            |               |                                                                     |                  |                                |
| WAN014HHU_at      |     |        |         |         |         |         |           |            |               |                                                                     |                  |                                |
| WAN014HFJ_at      |     |        |         |         |         |         |           |            |               |                                                                     |                  |                                |
| WAN014HHV_at      |     |        |         |         |         |         |           |            |               |                                                                     |                  |                                |
| WAN014HFV_at      |     |        |         |         |         |         |           |            |               |                                                                     |                  |                                |
| WAN014HHQ_at      |     |        |         |         |         |         |           |            |               |                                                                     |                  |                                |
| WAN014HHR_at      |     |        |         |         |         |         |           |            |               |                                                                     |                  |                                |
| WAN014HFJW_at     |     |        |         |         |         |         |           |            |               |                                                                     |                  |                                |
| WAN014HHS_at      |     |        |         |         |         |         |           |            |               |                                                                     |                  |                                |
| WAN014HHT_at      |     |        |         |         |         |         |           |            |               |                                                                     |                  |                                |
| WAN014HFZ_at      |     |        |         |         |         |         |           |            |               |                                                                     |                  |                                |
| WAN014HG0_at      |     |        |         |         |         |         |           |            |               |                                                                     |                  |                                |
| WAN014HG1_at      |     |        |         |         |         |         |           |            |               |                                                                     |                  |                                |
| WAN014HW_at       |     |        |         |         |         |         |           |            |               |                                                                     |                  |                                |
| WAN014HGN_at      |     |        |         |         |         |         |           |            |               |                                                                     |                  |                                |
| WAN014HGQ_at      |     |        |         |         |         |         |           |            |               |                                                                     |                  |                                |
| WAN014HGS_at      |     |        |         |         |         |         |           |            |               |                                                                     |                  |                                |
| WAN014HGT_at      |     |        |         |         |         |         |           |            |               |                                                                     |                  |                                |
| WAN014HGU_at      |     |        |         |         |         |         |           |            |               |                                                                     |                  |                                |
| WAN014HGV_at      |     |        |         |         |         |         |           |            |               |                                                                     |                  |                                |
| WAN014HGW_at      |     |        |         |         |         |         |           |            |               |                                                                     |                  |                                |
| WAN014HGX_at      |     |        |         |         |         |         |           |            |               |                                                                     |                  |                                |

| Systematic          | COL    | N315     | MRSA     | MSSA     | Mu50    | MW2    | GENE NAME | GenBank ID     | GenBank Desc.                                                              | Protein Function | TIGR Main Role | TIGR Sub Role |
|---------------------|--------|----------|----------|----------|---------|--------|-----------|----------------|----------------------------------------------------------------------------|------------------|----------------|---------------|
| AB047089-cds1_at    |        |          |          |          | SAV0057 |        |           | AB047089-cds1  | Staphylococcus aureus (strain 85/3907) DNA.                                |                  |                |               |
| WAN014HJ8_at        |        |          |          |          |         |        |           | AF051916-cds4  | Gene:Product:unknown;Note:ORF-140; truncated by IS257 insertion            |                  |                |               |
| WAN014HJC_at        |        |          |          |          |         |        |           | AF051916-cds5  | Gene:orfA;Product:trimethoprim resistance protein DfA;Note:DHFR            |                  |                |               |
| WAN014HJF_at        |        |          |          |          |         |        |           | AF051917-cds22 | Gene:artA;Product:putative regulator of transfer genes ArtA                |                  |                |               |
| WAN014HI1_at        |        |          |          |          |         |        |           | AF051917-cds23 | Gene:traA;Product:TraA                                                     |                  |                |               |
| WAN014HI2_at        |        |          |          |          |         |        |           | AF051917-cds24 | Gene:traB;Product:putative membrane protein TraB                           |                  |                |               |
| WAN014HI5_at        |        |          |          |          |         |        |           | AF051917-cds25 | Gene:traC;Product:putative membrane protein TraC                           |                  |                |               |
| WAN014HI6_at        |        |          |          |          |         |        |           | AF051917-cds26 | Gene:traD;Product:TraD                                                     |                  |                |               |
| WAN014HI7_at        |        |          |          |          |         |        |           | AF051917-cds27 | Gene:traE;Product:putative ATPase TraE                                     |                  |                |               |
| WAN014HI8_at        |        |          |          |          |         |        |           | AF051917-cds28 | Gene:traF;Product:putative membrane protein TraF                           |                  |                |               |
| WAN014HI9_at        |        |          |          |          |         |        |           | AF051917-cds29 | Gene:traG;Product:putative membrane protein TraG                           |                  |                |               |
| WAN014HIA_at        |        |          |          |          |         |        |           | AF051917-cds30 | Gene:traH;Product:lipoprotein TraH                                         |                  |                |               |
| WAN014HIB_at        |        |          |          |          |         |        |           | AF051917-cds31 | Gene:traI;Product:putative topoisomerase TraI                              |                  |                |               |
| WAN014HIC_at        |        |          |          |          |         |        |           | AF051917-cds32 | Gene:traJ;Product:putative membrane protein TraJ                           |                  |                |               |
| WAN014HID_at        |        |          |          |          |         |        |           | AF051917-cds33 | Gene:traK;Product:putative membrane protein TraK                           |                  |                |               |
| WAN014HIE_at        |        |          |          |          |         |        |           | AF051917-cds34 | Gene:traL;Product:putative membrane protein TraL                           |                  |                |               |
| WAN014HII_at        |        |          |          |          |         |        |           | AF051917-cds35 | Gene:traM;Product:                                                         |                  |                |               |
| WAN014IWC_x_at      |        |          |          |          |         |        |           | AF053772-cds1  | Gene:sin;Product:putative recombinase Sin                                  |                  |                |               |
| WAN014HJ1_at        |        |          |          |          |         |        |           | AF117258-cds4  | Gene:vat;Product:acetyltransferase Vat                                     |                  |                |               |
| WAN014HJ2_at        |        |          |          |          |         |        |           | AF117258-cds5  | Gene:vgb;Product:hydrolase VgB                                             |                  |                |               |
| WAN014HJ3_at        |        |          |          |          |         |        |           | AF117259-cds3  | Gene:Product:ATP binding protein VgA;Note:putative ATP transporter         |                  |                |               |
| WAN014HG_X_at       |        |          |          |          |         |        |           | AF217235-cds15 | Gene:Product:Orf15                                                         |                  |                |               |
| X58434-cds1_at      |        |          |          |          |         |        |           | AF235026-cds1  | Gene:pdhB;Product:pyruvate dehydrogenase beta subunit PdhB                 |                  |                |               |
| WAN014HJU_at        |        |          |          |          |         |        |           | AF259550-cds1  | Gene:agrD;Product:AgriD signal peptide precursor;Note:autoinducing-peptide |                  |                |               |
| WAN014HKG_a_at      |        |          |          |          |         |        |           | AJ132841-cds1  | Gene:mapN;Product:MapN protein                                             |                  |                |               |
| AP001553-cds14_x_at |        |          | SAR1546  |          |         |        |           | AP001553-cds14 | bacteriophage phi ETA (specific_host:Staphylococcus aureus E-1) DNA.       |                  |                |               |
| WAN014GM8_at        |        |          |          |          |         |        |           | AP001553-cds18 | bacteriophage phi ETA (specific_host:Staphylococcus aureus E-1) DNA.       |                  |                |               |
| WAN014GM7_at        |        |          |          |          |         |        |           | AP001553-cds22 | bacteriophage phi ETA (specific_host:Staphylococcus aureus E-1) DNA.       |                  |                |               |
| WAN014GM6_at        |        |          |          |          |         |        |           | AP001553-cds23 | bacteriophage phi ETA (specific_host:Staphylococcus aureus E-1) DNA.       |                  |                |               |
| WAN014G08_at        |        |          |          |          |         |        |           | AP001553-cds28 | bacteriophage phi ETA (specific_host:Staphylococcus aureus E-1) DNA.       |                  |                |               |
| AP001553-cds44_at   |        |          |          |          |         |        |           | AP001553-cds44 | bacteriophage phi ETA (specific_host:Staphylococcus aureus E-1) DNA.       |                  |                |               |
| WAN014HKQ_at        | SAV199 |          |          |          | SAV1997 |        |           | AP001553-cds7  | bacteriophage phi ETA (specific_host:Staphylococcus aureus E-1) DNA.       |                  |                |               |
| WAN014IWP_at        |        |          |          |          |         |        |           | D42144-cds1    | Staphylococcus aureus Bacteria; Firmicutes; GENE=""coa""                   |                  |                |               |
| WAN014HL5_at        |        |          |          |          |         |        |           |                | Staphylococcus aureus (strain:PB3) DNA.                                    |                  |                |               |
| WAN014IWM_at        |        |          |          |          |         |        |           |                | Staphylococcus aureus Bacteria; GENE=""tbpA""                              |                  |                |               |
| WAN014IGN_at        |        |          |          |          | SAVP005 |        |           |                | Staphylococcus aureus subsp. aureus Mu50 GENE=""SAVP005""                  |                  |                |               |
| WAN014HIJ_at        |        |          |          |          |         |        |           |                | Staphylococcus aureus Bacteria; Firmicutes; GENE=N/A                       |                  |                |               |
| WAN014IQA_at        |        |          |          |          |         |        |           |                | Staphylococcus aureus Bacteria; Firmicutes; GENE=N/A                       |                  |                |               |
| WAN014HIK_at        |        |          |          |          |         |        |           |                | Staphylococcus aureus Bacteria; Firmicutes; GENE=N/A                       |                  |                |               |
| WAN014FWL_at        |        |          | SAS0898  |          | SAV0852 |        |           |                | Staphylococcus aureus subsp. aureus Mu50 GENE=""SAV0852""                  |                  |                |               |
| WAN014GDP_at        |        |          |          |          | SAV0895 |        |           |                | Staphylococcus aureus subsp. aureus Mu50 GENE=""SAV0895""                  |                  |                |               |
| WAN014G4W_at        |        |          |          |          | SAV0917 |        |           |                | Staphylococcus aureus subsp. aureus Mu50 GENE=""SAV0917""                  |                  |                |               |
| WAN01C4VF_at        |        |          |          |          |         |        |           |                | Staphylococcus aureus subsp. aureus Mu50 GENE=""SAV2013""                  |                  |                |               |
| WAN01C4VG_at        |        |          |          |          |         |        |           |                | Staphylococcus aureus subsp. aureus Mu50 GENE=""SAV2014""                  |                  |                |               |
| WAN014GGO_at        |        |          |          |          | SAVP007 |        |           |                | Staphylococcus aureus subsp. aureus Mu50 GENE=""SAVP007""                  |                  |                |               |
| WAN014GSP_at        |        |          |          |          | SAVP009 |        |           |                | Staphylococcus aureus subsp. aureus Mu50 GENE=""SAVP009""                  |                  |                |               |
| WAN014GGO_at        |        |          |          |          | SAVP011 |        |           |                | Staphylococcus aureus subsp. aureus Mu50 GENE=""SAVP011""                  |                  |                |               |
| WAN014IJA_at        |        |          |          |          |         |        |           |                | Staphylococcus epidermidis Bacteria; Firmicutes; GENE=""trp""              |                  |                |               |
| J04551-cds1_at      |        |          |          |          |         |        |           | J04551-cds1    | Plasmid pI258 DNA.                                                         |                  |                |               |
| WAN014HLR_at        |        |          |          |          | SAV0848 |        |           | M27965-cds1    | Bacteriophage L54a DNA.                                                    |                  |                |               |
| WAN014HLW_at        | SA2703 |          |          |          |         |        |           | M28521-cds1    | Gene:entD;Product:enterotoxin D precursor                                  |                  |                |               |
| WAN014HLX_at        | SA2701 |          |          |          |         |        |           | M36694-cds1    | S.aureus (strain PS80) DNA.                                                |                  |                |               |
| WAN014IRB_at        |        |          |          |          |         |        |           |                | Staphylococcus aureus GENE=""sm""                                          |                  |                |               |
| WAN014IQY_at        |        |          |          |          |         |        |           |                | Staphylococcus aureus Bacteria; Firmicutes; GENE=""nes""                   |                  |                |               |
| WAN014WE_at         |        |          |          |          |         |        |           |                | Staphylococcus aureus Bacteria; Firmicutes; GENE=""pre""                   |                  |                |               |
| WAN014IWL_at        |        |          |          |          |         |        |           |                | Staphylococcus aureus Bacteria; GENE=N/A                                   |                  |                |               |
| WAN014HM7_at        |        |          |          |          |         |        |           | U75367-cds1    | Gene:Product:transposase                                                   |                  |                |               |
| X03216-cds7_at      |        |          |          |          |         |        |           | X03216-cds7    | Gene:Product:peptide 1;Note:(aa 1-15)                                      |                  |                |               |
| X06627-cds4_at      |        |          |          |          |         |        |           | X06627-cds4    | Gene:Product:ORF (str)                                                     |                  |                |               |
| X16298-cds2_at      |        |          |          |          |         |        |           | X16298-cds2    | Gene:Product;Note:bin3 product                                             |                  |                |               |
| X53096-cds1_at      |        |          |          |          |         |        |           | X53096-cds1    | Gene:Product:Sau96I DNA methyltransferase                                  |                  |                |               |
| X53096-cds2_at      |        |          |          |          |         |        |           | X53096-cds2    | Gene:Product:Sau96I restriction endonuclease                               |                  |                |               |
| X75439-cds1_at      |        |          |          |          |         |        |           | X75439-cds1    | Gene:Product:Note:ORF B                                                    |                  |                |               |
| X75439-cds3_at      |        |          |          |          |         |        |           | X75439-cds3    | Gene:Product:Note:ORF C                                                    |                  |                |               |
| Y07536-cds4_x_at    |        |          |          |          |         |        |           | Y07536-cds4    | Gene:Product:transposase                                                   |                  |                |               |
| Y07739-cds1_at      |        |          |          |          |         |        |           | Y07739-cds1    | Staphylococcus phage Twort.                                                |                  |                |               |
| Y07739-cds2_at      |        |          |          |          |         |        |           | Y07739-cds2    | Staphylococcus phage Twort.                                                |                  |                |               |
| Y07740-cds1_at      |        |          |          |          |         |        |           | Y07740-cds1    | Staphylococcus phage 187.                                                  |                  |                |               |
| Y13600-cds4_at      |        |          |          |          |         |        |           | Y13600-cds4    | Staphylococcus aureus.                                                     |                  |                |               |
| Y13766-cds1_at      |        |          |          |          |         |        |           | Y13766-cds1    | Staphylococcus aureus.                                                     |                  |                |               |
| WAN014FRY_at        |        |          |          | SAS0040  |         |        |           |                |                                                                            |                  |                |               |
| WAN014FWT_at        |        |          |          | SAS0930  |         |        |           |                |                                                                            |                  |                |               |
| WAN014GI6_at        | SAV039 |          |          |          | SAV0393 |        |           |                |                                                                            |                  |                |               |
| WAN014G9L_at        |        |          |          |          |         |        |           |                |                                                                            |                  |                |               |
| WAN014GA2_at        | SAV039 |          |          |          | SAV0394 |        |           |                |                                                                            |                  |                |               |
| WAN014GA4_at        | SAV040 |          |          |          | SAV0403 |        |           |                |                                                                            |                  |                |               |
| WAN014GCJ_at        |        |          |          |          |         |        |           |                |                                                                            |                  |                |               |
| WAN014GDS_x_at      |        |          |          |          | SAV0863 |        |           |                |                                                                            |                  |                |               |
| WAN014GE4_at        |        |          |          |          |         |        |           |                |                                                                            |                  |                |               |
| WAN014GEC_x_at      |        |          |          |          |         |        |           |                |                                                                            |                  |                |               |
| WAN014GF1_at        |        |          |          |          |         |        |           |                |                                                                            |                  |                |               |
| WAN014GFN_at        | SAS077 |          |          |          | SAV2214 |        |           |                |                                                                            |                  |                |               |
| WAN014G59_at        |        |          |          |          |         |        |           |                |                                                                            |                  |                |               |
| WAN014GGX_x_at      |        |          |          |          |         |        |           |                |                                                                            |                  |                |               |
| WAN014GH2_at        | SA0030 | SAR0031a |          |          | SAV0032 |        |           |                |                                                                            |                  |                |               |
| WAN014GH3_at        | SA0031 | SAR0031b |          |          | SAV0033 |        |           |                |                                                                            |                  |                |               |
| WAN014GH4_at        | SA0033 | SAR0075a |          |          | SAV0077 |        |           |                |                                                                            |                  |                |               |
| WAN014GH7_at        | SAS004 |          | SAS0101a |          | SAV0127 |        |           |                |                                                                            |                  |                |               |
| WAN014GH8_at        | SA2699 | SA0188   | SAR0195  | SAS0169  | SAV0194 | MW0168 |           |                |                                                                            |                  |                |               |
| WAN014GH9_at        |        | SA0066   |          | SAS0179  | SAV0204 | MW0179 |           |                |                                                                            |                  |                |               |
| WAN014HD1_at        |        | SA0011   |          | SAS0352  | SAV0375 | MW0350 |           |                |                                                                            |                  |                |               |
| WAN014GHH_at        |        | SA0013   |          |          | SAV0430 |        |           |                |                                                                            |                  |                |               |
| WAN014GHO_at        |        | SAS038   |          | SAS1231a | SAV1299 | MW1181 |           |                |                                                                            |                  |                |               |
| WAN014GIF_at        |        | SA1610   |          | SAS1712a | SAV1792 | MW1730 |           |                |                                                                            |                  |                |               |
| WAN014GIN_at        |        | SA0075   |          | SAS2099  | SAV2198 | MW2124 |           |                |                                                                            |                  |                |               |
| WAN014GK0_at        |        |          |          |          |         |        |           |                |                                                                            |                  |                |               |
| WAN014GKA_x_at      |        |          |          |          |         |        |           |                |                                                                            |                  |                |               |
| WAN014GKF_at        |        |          |          |          |         |        |           |                |                                                                            |                  |                |               |
| WAN014GKI_at        |        |          |          |          |         |        |           |                |                                                                            |                  |                |               |
| WAN014GKO_at        |        |          |          |          |         |        |           |                |                                                                            |                  |                |               |
| WAN014GLR_at        |        |          | SAS1657a |          |         | MW1673 |           |                |                                                                            |                  |                |               |
| WAN014GM2_at        |        |          |          |          |         |        |           |                |                                                                            |                  |                |               |

| Systematic        | COL | N315   | MRSA     | MSSA    | Mu50 | MW2     | GENE<br>NAME | GenBank ID | GenBank Desc. | Protein Function | TIGR Main Role | TIGR Sub Role |
|-------------------|-----|--------|----------|---------|------|---------|--------------|------------|---------------|------------------|----------------|---------------|
| WAN014GML_at      |     | SA1803 | SAR2098  |         |      |         |              |            |               |                  |                |               |
| WAN014GOD_at      |     |        | SAR1548  |         |      |         |              |            |               |                  |                |               |
| WAN014GOQ_at      |     |        |          |         |      |         |              |            |               |                  |                |               |
| WAN014GOX_at      |     |        | SAR2102  |         |      |         |              |            |               |                  |                |               |
| WAN014GRF_at      |     |        |          |         |      |         |              |            |               |                  |                |               |
| WAN014GSL_at      |     |        |          |         |      |         |              |            |               |                  |                |               |
| WAN014GT6_at      |     |        |          |         |      |         |              |            |               |                  |                |               |
| WAN014GX6_at      |     |        |          |         |      |         |              |            |               |                  |                |               |
| WAN014H2L_x_at    |     |        |          |         |      |         |              |            |               |                  |                |               |
| WAN014HL9_at      |     | SA0075 | SAR0077  |         |      | SAV0079 |              |            |               |                  |                |               |
| WAN014HOD_at      |     |        |          |         |      |         |              |            |               |                  |                |               |
| WAN014HOP_at      |     |        |          |         |      |         |              |            |               |                  |                |               |
| WAN014HOV_at      |     |        |          |         |      |         |              |            |               |                  |                |               |
| WAN014HRQ_at      |     |        |          |         |      |         |              |            |               |                  |                |               |
| WAN014HRR_at      |     |        |          |         |      |         |              |            |               |                  |                |               |
| WAN014HRS_at      |     |        |          |         |      |         |              |            |               |                  |                |               |
| WAN014HTN_at      |     |        |          |         |      |         |              |            |               |                  |                |               |
| WAN014HL5_at      |     |        |          |         |      |         |              |            |               |                  |                |               |
| WAN014HV8_at      |     |        | SAR2073  |         |      |         |              |            |               |                  |                |               |
| WAN014HW6_at      |     |        |          |         |      |         |              |            |               |                  |                |               |
| WAN014HW9_at      |     |        |          |         |      |         |              |            |               |                  |                |               |
| WAN014HZL_at      |     |        |          |         |      |         |              |            |               |                  |                |               |
| WAN014HZM_at      |     |        |          |         |      |         |              |            |               |                  |                |               |
| WAN014HM_at       |     |        |          |         |      |         |              |            |               |                  |                |               |
| WAN014INZ_at      |     |        |          |         |      |         |              |            |               |                  |                |               |
| WAN014IO0_at      |     |        |          |         |      |         |              |            |               |                  |                |               |
| WAN014IO6_at      |     |        |          |         |      |         |              |            |               |                  |                |               |
| WAN014IO9_at      |     |        | SAR1322  |         |      |         |              |            |               |                  |                |               |
| WAN014IOF_at      |     | SA0350 | SAR0359  | SAS0338 |      | SAV0362 | MW0338       |            |               |                  |                |               |
| WAN014IQ3_at      |     | SA0053 |          |         |      | SAV0057 |              |            |               |                  |                |               |
| WAN014IRG_at      |     |        |          |         |      |         |              |            |               |                  |                |               |
| WAN014IRL_at      |     |        |          |         |      |         |              |            |               |                  |                |               |
| WAN014ISF_at      |     |        |          |         |      |         |              |            |               |                  |                |               |
| WAN014ISW_at      |     |        |          |         |      |         |              |            |               |                  |                |               |
| WAN014IT7_at      |     |        |          |         |      |         |              |            |               |                  |                |               |
| WAN014ITF_at      |     |        |          |         |      |         |              |            |               |                  |                |               |
| WAN014ITI_at      |     |        |          |         |      |         |              |            |               |                  |                |               |
| WAN014ITY_at      |     |        |          |         |      |         |              |            |               |                  |                |               |
| WAN014IUW_at      |     |        |          |         |      |         |              |            |               |                  |                |               |
| WAN014IVA_at      |     |        | SAR1137  |         |      |         |              |            |               |                  |                |               |
| WAN014IVU_at      |     |        |          |         |      |         |              |            |               |                  |                |               |
| WAN014IVY_at      |     | SAV086 |          |         |      | SAV0867 |              |            |               |                  |                |               |
| WAN014IW6_at      |     |        |          |         |      |         |              |            |               |                  |                |               |
| WAN014IW7_at      |     |        |          |         |      |         |              |            |               |                  |                |               |
| WAN014IW8_at      |     | SAV165 |          |         |      | SAV1654 |              |            |               |                  |                |               |
| WAN014IW9_at      |     |        |          |         |      |         |              |            |               |                  |                |               |
| WAN014IWA_at      |     |        |          |         |      |         |              |            |               |                  |                |               |
| WAN014IWD_at      |     |        |          |         |      |         |              |            |               |                  |                |               |
| WAN014IX0_at      |     |        |          |         |      |         |              |            |               |                  |                |               |
| WAN014IXJ_s_at    |     | SAV197 |          |         |      | SAV1977 |              |            |               |                  |                |               |
| WAN014IXP_at      |     |        |          |         |      |         |              |            |               |                  |                |               |
| WAN014IXX_at      |     |        |          |         |      |         |              |            |               |                  |                |               |
| WAN014IS61_s_at   |     |        |          |         |      | SAV0867 |              |            |               |                  |                |               |
| WAN01A72C_x_at    |     |        |          |         |      | SAV0915 |              |            |               |                  |                |               |
| WAN01A736_at      |     |        |          |         |      |         |              |            |               |                  |                |               |
| WAN01A73B_at      |     |        |          |         |      |         |              |            |               |                  |                |               |
| WAN01A73T_x_at    |     |        |          |         |      |         |              |            |               |                  |                |               |
| WAN01A771_x_at    |     |        |          |         |      |         |              |            |               |                  |                |               |
| WAN01A776_at      |     |        |          |         |      |         |              |            |               |                  |                |               |
| WAN01A7N_x_at     |     |        |          | SAS0914 |      |         |              |            |               |                  |                |               |
| WAN01A7Y_x_at     |     |        |          |         |      |         |              |            |               |                  |                |               |
| WAN01A7JA_at      |     |        |          |         |      |         |              |            |               |                  |                |               |
| WAN01A7HT_at      |     |        |          |         |      |         |              |            |               |                  |                |               |
| WAN01ABV_at       |     |        |          |         |      | SAV2208 |              |            |               |                  |                |               |
| WAN01ABX_s_at     |     |        |          |         |      |         |              |            |               |                  |                |               |
| WAN01ABMR_at      |     |        |          |         |      |         |              |            |               |                  |                |               |
| WAN01ABS8_at      |     |        |          |         |      |         |              |            |               |                  |                |               |
| WAN01AAW5_s_at    |     |        |          |         |      |         |              |            |               |                  |                |               |
| WAN01ABSH_at      |     |        |          |         |      |         |              |            |               |                  |                |               |
| WAN01ABL8_at      |     |        |          |         |      |         |              |            |               |                  |                |               |
| WAN01AC23_at      |     |        |          |         |      |         |              |            |               |                  |                |               |
| WAN01ACOT_at      |     |        |          |         |      |         |              |            |               |                  |                |               |
| WAN01BRC0_at      |     |        | SAR0604  |         |      |         |              |            |               |                  |                |               |
| WAN01BSDG_at      |     |        |          |         |      |         |              |            |               |                  |                |               |
| WAN01BSVG_at      |     |        |          |         |      |         |              |            |               |                  |                |               |
| WAN01BSY9_at      |     |        |          |         |      |         |              |            |               |                  |                |               |
| WAN01BSYF_at      |     |        | SAR0089  |         |      |         |              |            |               |                  |                |               |
| WAN01BSYQ_at      |     |        | SAR0100  |         |      |         |              |            |               |                  |                |               |
| WAN01BT0Y_at      |     |        |          |         |      |         |              |            |               |                  |                |               |
| WAN01BT18_at      |     |        |          |         |      |         |              |            |               |                  |                |               |
| WAN01BT3F_at      |     |        |          |         |      |         |              |            |               |                  |                |               |
| WAN01BT42_at      |     |        |          |         |      |         |              |            |               |                  |                |               |
| WAN01BT61_at      |     |        | SAR0371  |         |      |         |              |            |               |                  |                |               |
| WAN01BT6Y_x_at    |     |        |          |         |      |         |              |            |               |                  |                |               |
| WAN01BT76_x_at    |     |        | SAR395a  |         |      |         |              |            |               |                  |                |               |
| WAN01BT7P_at      |     |        |          |         |      |         |              |            |               |                  |                |               |
| WAN01BT82_at      |     |        |          |         |      |         |              |            |               |                  |                |               |
| WAN01BT83_at      |     |        |          |         |      |         |              |            |               |                  |                |               |
| WAN01BTCM_at      |     |        |          |         |      |         |              |            |               |                  |                |               |
| WAN01BTCY_at      |     |        |          |         |      |         |              |            |               |                  |                |               |
| WAN01BTCZ_x_at    |     |        |          |         |      |         |              |            |               |                  |                |               |
| WAN01BTD4_at      |     |        |          |         |      |         |              |            |               |                  |                |               |
| WAN01BTE0_at      |     |        |          |         |      |         |              |            |               |                  |                |               |
| WAN01BTRQ_at      |     |        | SAR1133  |         |      |         |              |            |               |                  |                |               |
| WAN01BTRU_x_at    |     |        | SAR1136a |         |      |         |              |            |               |                  |                |               |
| WAN01BTRWH_at     |     |        | SAR1303  |         |      |         |              |            |               |                  |                |               |
| WAN01BU0Q-seg2_at |     |        | SAR1447  |         |      |         |              |            |               |                  |                |               |
| WAN01BU2V_at      |     |        | SAR1521  |         |      |         |              |            |               |                  |                |               |
| WAN01BU3A_at      |     |        | SAR1534  |         |      |         |              |            |               |                  |                |               |
| WAN01BU3M_at      |     |        |          |         |      |         |              |            |               |                  |                |               |
| WAN01BU3T_at      |     |        | SAR1553  |         |      |         |              |            |               |                  |                |               |
| WAN01BUB0_at      |     |        |          |         |      |         |              |            |               |                  |                |               |

| Systematic     | COL | N315   | MRSA     | MSSA | Mu50 | MW2    | GENE<br>NAME | GenBank ID | GenBank Desc. | Protein Function | TIGR Main Role | TIGR Sub Role |
|----------------|-----|--------|----------|------|------|--------|--------------|------------|---------------|------------------|----------------|---------------|
| WAN01BUBX_at   |     |        |          |      |      |        |              |            |               |                  |                |               |
| WAN01BUCD_at   |     |        |          |      |      |        |              |            |               |                  |                |               |
| WAN01BUCI_at   |     |        |          |      |      |        |              |            |               |                  |                |               |
| WAN01BUD8_at   |     |        | SAR1860  |      |      |        |              |            |               |                  |                |               |
| WAN01BUDN_at   |     |        |          |      |      |        |              |            |               |                  |                |               |
| WAN01BUDO_at   |     |        |          |      |      |        |              |            |               |                  |                |               |
| WAN01BUDS_at   |     |        | SAR1908  |      |      |        |              |            |               |                  |                |               |
| WAN01BUDW_at   |     |        |          |      |      |        |              |            |               |                  |                |               |
| WAN01BUE7_at   |     |        |          |      |      |        |              |            |               |                  |                |               |
| WAN01BUEG_at   |     |        |          |      |      |        |              |            |               |                  |                |               |
| WAN01BUIS_x_at |     |        | SAR2088  |      |      |        |              |            |               |                  |                |               |
| WAN01BUJU_x_at |     |        | SAR2090  |      |      |        |              |            |               |                  |                |               |
| WAN01BUJ6_at   |     |        |          |      |      |        |              |            |               |                  |                |               |
| WAN01BUJD_at   |     |        |          |      |      |        |              |            |               |                  |                |               |
| WAN01BUJF_at   |     |        | SAR2114  |      |      |        |              |            |               |                  |                |               |
| WAN01BUJG_at   |     |        | SAR2115  |      |      |        |              |            |               |                  |                |               |
| WAN01BUM7_at   |     |        |          |      |      |        |              |            |               |                  |                |               |
| WAN01BUN_at    |     |        | SAR2289a |      |      |        |              |            |               |                  |                |               |
| WAN01BUOX_at   |     |        | SAR2297a |      |      |        |              |            |               |                  |                |               |
| WAN01BUOY_at   |     |        | SAR2297b |      |      |        |              |            |               |                  |                |               |
| WAN01BUT1_s_at |     |        |          |      |      |        |              |            |               |                  |                |               |
| WAN01BUUK_at   |     |        | SAR2494  |      |      |        |              |            |               |                  |                |               |
| WAN01BUV1_at   |     |        |          |      |      |        |              |            |               |                  |                |               |
| WAN01BUVV_at   |     |        |          |      |      |        |              |            |               |                  |                |               |
| WAN01BUVX_at   |     |        |          |      |      |        |              |            |               |                  |                |               |
| WAN01BUX0_at   |     |        |          |      |      |        |              |            |               |                  |                |               |
| WAN01BUX3_at   |     |        |          |      |      |        |              |            |               |                  |                |               |
| WAN01BUX4_at   |     |        |          |      |      |        |              |            |               |                  |                |               |
| WAN01BUYQ_at   |     |        |          |      |      |        |              |            |               |                  |                |               |
| WAN01BUY2_at   |     |        |          |      |      |        |              |            |               |                  |                |               |
| WAN01BVOF_at   |     |        |          |      |      |        |              |            |               |                  |                |               |
| WAN01BV10_x_at |     |        |          |      |      |        |              |            |               |                  |                |               |
| WAN01BV21_at   |     |        |          |      |      |        |              |            |               |                  |                |               |
| WAN01BW3M_x_at |     |        |          |      |      |        |              |            |               |                  |                |               |
| WAN01BWZ7_at   |     |        |          |      |      |        |              |            |               |                  |                |               |
| WAN01BX0L_at   |     |        |          |      |      |        |              |            |               |                  |                |               |
| WAN01BX0R_at   |     |        | SAS0030  |      |      |        |              |            |               |                  |                |               |
| WAN01BX10_at   |     |        |          |      |      |        |              |            |               |                  |                |               |
| WAN01BX13_at   |     |        |          |      |      |        |              |            |               |                  |                |               |
| WAN01BX4S_at   |     |        |          |      |      |        |              |            |               |                  |                |               |
| WAN01BXBA_x_at |     |        |          |      |      |        |              |            |               |                  |                |               |
| WAN01BXBJ_at   |     |        |          |      |      |        |              |            |               |                  |                |               |
| WAN01BXDI_at   |     |        |          |      |      |        |              |            |               |                  |                |               |
| WAN01BXGF_x_at |     |        |          |      |      |        |              |            |               |                  |                |               |
| WAN01BXQZ_at   |     |        |          |      |      |        |              |            |               |                  |                |               |
| WAN01BXVP_at   |     |        |          |      |      |        |              |            |               |                  |                |               |
| WAN01BY7T_at   |     |        |          |      |      |        |              |            |               |                  |                |               |
| WAN01BY0E_at   |     |        |          |      |      |        |              |            |               |                  |                |               |
| WAN01BY3W_at   |     |        |          |      |      | MW1324 |              |            |               |                  |                |               |
| WAN01BY5D_at   |     |        |          |      |      |        |              |            |               |                  |                |               |
| WAN01BYLV_x_at |     |        |          |      |      |        |              |            |               |                  |                |               |
| WAN01BYTK_at   |     |        |          |      |      |        |              |            |               |                  |                |               |
| WAN01BYU4_at   |     |        | SAS2278a |      |      | MW2309 |              |            |               |                  |                |               |
| WAN01BZ41_at   |     |        |          |      |      |        |              |            |               |                  |                |               |
| WAN01BZ42_at   |     |        |          |      |      |        |              |            |               |                  |                |               |
| WAN01BZ43_at   |     |        |          |      |      |        |              |            |               |                  |                |               |
| WAN01BZ44_at   |     |        |          |      |      |        |              |            |               |                  |                |               |
| WAN01BZ45_at   |     |        |          |      |      |        |              |            |               |                  |                |               |
| WAN01BZ47_at   |     |        |          |      |      |        |              |            |               |                  |                |               |
| WAN01BZ48_at   |     |        |          |      |      |        |              |            |               |                  |                |               |
| WAN01BZ49_at   |     |        |          |      |      |        |              |            |               |                  |                |               |
| WAN01BZ4A_at   |     |        |          |      |      |        |              |            |               |                  |                |               |
| WAN01BZ50_at   |     |        |          |      |      |        |              |            |               |                  |                |               |
| WAN01BZ51_at   |     |        |          |      |      |        |              |            |               |                  |                |               |
| WAN01BZ52_at   |     |        |          |      |      |        |              |            |               |                  |                |               |
| WAN01BZ54_at   |     |        |          |      |      |        |              |            |               |                  |                |               |
| WAN01BZ55_at   |     |        |          |      |      |        |              |            |               |                  |                |               |
| WAN01C1E4_at   |     |        |          |      |      |        |              |            |               |                  |                |               |
| WAN01C1EJ_at   |     |        |          |      |      |        |              |            |               |                  |                |               |
| WAN01C1PZ_at   |     |        |          |      |      |        |              |            |               |                  |                |               |
| WAN01C1RL_x_at |     |        |          |      |      |        |              |            |               |                  |                |               |
| WAN01C1ST_s_at |     |        |          |      |      |        |              |            |               |                  |                |               |
| WAN01C26O_at   |     |        |          |      |      |        |              |            |               |                  |                |               |
| WAN01C299_at   |     |        |          |      |      |        |              |            |               |                  |                |               |
| WAN01C2H9_at   |     |        |          |      |      |        |              |            |               |                  |                |               |
| WAN01C2HO_at   |     |        |          |      |      |        |              |            |               |                  |                |               |
| WAN01C2TP_at   |     |        |          |      |      |        |              |            |               |                  |                |               |
| WAN01C2V3_at   |     |        |          |      |      |        |              |            |               |                  |                |               |
| WAN01C2V7_at   |     |        |          |      |      |        |              |            |               |                  |                |               |
| WAN01C3MJ_at   |     | SAV039 |          |      |      |        |              |            |               |                  |                |               |
| WAN01C4US_at   |     | SAV199 |          |      |      |        |              |            |               |                  |                |               |
| WAN01C7GQ_at   |     |        |          |      |      |        |              |            |               |                  |                |               |
| WAN01C7NC_at   |     |        |          |      |      |        |              |            |               |                  |                |               |
| WAN01C8MO_at   |     |        |          |      |      |        |              |            |               |                  |                |               |
| WAN01C8OH_x_at |     |        |          |      |      |        |              |            |               |                  |                |               |
| WAN01C8OY_at   |     |        |          |      |      |        |              |            |               |                  |                |               |
| WAN01C8P5_at   |     |        |          |      |      |        |              |            |               |                  |                |               |
| WAN01C8TY_at   |     |        |          |      |      |        |              |            |               |                  |                |               |
