# Supplementary material for: Changes in the Staphylococcus aureus Transcriptome during Early Adaptation to the Lung
Source: PubMed Central journal article supplement (PMC3410880; doi:10.1371/journal.pone.0041329), 2012-08-02
Supplement: pone.0041329.s006.pdf [file pone.0041329.s006.pdf]

Supplemental table 4: Disposition of Pathogenicity Islands and Mobile Genetic Elements in *S. aureus* strain JP1

| Island/MGE     | Comments                                                                                                                                                                                                                                                                                                                                                                                                                     |
|----------------|------------------------------------------------------------------------------------------------------------------------------------------------------------------------------------------------------------------------------------------------------------------------------------------------------------------------------------------------------------------------------------------------------------------------------|
| SCC <i>mec</i> | Not present                                                                                                                                                                                                                                                                                                                                                                                                                  |
| ΦCOL           | 62 of 72 <i>orfs</i> absent. The 10 present code for unknown functions                                                                                                                                                                                                                                                                                                                                                       |
| vSaα           | Contains 5' genes from Type II (MW0368 - MW0381 except for MW0376) but contains only <i>set18</i> , <i>20</i> , <i>23</i> . These are same as <i>set8</i> , <i>10</i> and <i>12</i> of N316. Has <i>set7-13</i> , <i>set15</i> of Type I of N315, so region is a mix of type I and II. Missing restriction mod system <i>hsdM</i> , <i>hsdS</i> . Missing lipoprotein cluster <i>lpl1-9</i> (N315) or <i>lpl10-14</i> (MW2). |
| vSaβ           | Type II but contains <i>splA</i> and <i>splC</i> (type I)                                                                                                                                                                                                                                                                                                                                                                    |
| vSaγ           | Complete except missing COL-SA1163                                                                                                                                                                                                                                                                                                                                                                                           |
| φSa1mu         | 58 of 71 genes not found. Of 13 present, 10 are also in φCOL or φSa□.                                                                                                                                                                                                                                                                                                                                                        |
| φSa2mw         | Not present in JP1, but 3 genes of unknown function located in φSa2mw are found in JP1                                                                                                                                                                                                                                                                                                                                       |
| φSa3           | Similar to MW2, but contains 11 alleles found in N315 version                                                                                                                                                                                                                                                                                                                                                                |
| φSa4           | Not found in JP1                                                                                                                                                                                                                                                                                                                                                                                                             |
