# Supplementary material for: Changes in the Staphylococcus aureus Transcriptome during Early Adaptation to the Lung
Source: PubMed Central journal article supplement (PMC3410880; doi:10.1371/journal.pone.0041329), 2012-08-02
Supplement: pone.0041329.s007.pdf [file pone.0041329.s007.pdf]

| Systematic     | Stat. | Log  | 30'   | 120'  | 360'   | COL    | N315    | MRSa    | MSSA    | Mu50   | MW2        | GENE                                                                    | Protein Function                                           | TIGR Main Role | TIGR Sub Role | Fold change vs stationary phase |             |              |              |       |
|----------------|-------|------|-------|-------|--------|--------|---------|---------|---------|--------|------------|-------------------------------------------------------------------------|------------------------------------------------------------|----------------|---------------|---------------------------------|-------------|--------------|--------------|-------|
|                |       |      |       |       |        |        |         |         |         |        |            |                                                                         |                                                            |                |               | LB                              | 30' in vivo | 120' in vivo | 360' in vivo |       |
| WANO14FVH_at   | 0.9   | 7.6  | 4.3   | 3.7   | SA1407 | SA1203 | SAR1384 | SAS1311 | SAV1371 | MW1258 | trpF       | N-(5-phosphoribosyl)-anthranilate isomerase                             | Amino acid biosynthesis                                    |                |               |                                 |             |              |              |       |
| WANO14FVU_at   | 1.9   | 2.2  | 4.4   | 1.9   | SA1409 | SA1205 | SAR1386 | SAS1313 | SAV1373 | MW1260 | trpA       | tryptophan synthase, alpha subunit                                      | Amino acid biosynthesis                                    |                |               |                                 | 1.14        | 23.44        | 10.03        | 7.36  |
| WANO14FVJ_at   | 1.4   | 23.3 | 10.7  | 8.9   | SA1406 | SA1204 | SAR1385 | SAS1312 | SAV1372 | MW1259 | trpB       | tryptophan synthase, beta subunit                                       | Amino acid biosynthesis                                    |                |               |                                 | -1.09       | 16.40        | 7.73         | 6.46  |
| WANO14QVZ_at   | 1.4   | 1.6  | 3.6   | 3.4   | SA0429 | SA0345 | SAR0354 | SAS0333 | SAV0357 | MW0333 | rnhE2      | homocysteine S-methyltransferase                                        | Amino acid biosynthesis                                    |                |               |                                 | 1.17        | 2.67         | 2.54         | 2.29  |
| WANO14FWO_at   | 1.6   | 2.0  | 3.9   | 9.3   | SA1428 | SA1225 | SAR1405 | SAS1334 | SAV1393 | MW1281 | lysC       | aspartate kinase, nonfunctional class, putative                         | Amino acid biosynthesis                                    |                |               |                                 | 1.22        | 2.44         | 5.76         | 4.85  |
| WANO14GZ4_at   | 2.5   | 3.9  | 5.8   | 5.2   | SA0434 | SA0344 | SAR0353 | SAS0332 | SAV0356 | MW0332 | mseC       | 5-methyltetrahydropteroylglutamate-homocysteine methyltransferase       | Amino acid biosynthesis                                    |                |               |                                 | 1.56        | 2.32         | 2.10         | 3.73  |
| WANO14GRK_at   | 1.1   | 0.9  | 3.9   | 5.1   | SA0964 | SA0922 | SAR0923 | SA0931  | SAV0961 | MW0943 | argG       | argininosuccinate synthase                                              | Amino acid biosynthesis                                    |                |               |                                 |             |              |              |       |
| WANO14GYD_at   | 3.0   | 1.6  | 281.8 | 236.8 | SA0515 | SA0431 | SAR0472 | SA0430  | SAV0473 | MW0427 | gldB       | glutamate synthase, small subunit                                       | Amino acid biosynthesis                                    |                |               |                                 |             |              |              |       |
| WANO14GYA_at   | 2.3   | 7.7  | 116.1 | 114.9 | SA0514 | SA0430 | SAR0471 | SA0429  | SAV0472 | MW0426 | gltI       | glutamate synthase, large subunit                                       | Amino acid biosynthesis                                    |                |               |                                 | -1.85       | 93.27        | 78.39        | 34.96 |
| WANO14GRH_at   | 1.1   | 1.1  | 7.7   | 10.9  | SA0963 | SA0921 | SAR0922 | SA0930  | SAV0960 | MW0942 | argH       | argininosuccinate lyase                                                 | Amino acid biosynthesis                                    |                |               |                                 | -1.39       | 49.52        | 49.00        | 23.97 |
| WANO14GDB_at   |       |      | 3.9   | 2.4   | SA2702 | SA2470 | SAR2760 | SA2563  | SAV2876 | MW2597 | hisD       | histidinol dehydrogenase                                                | Amino acid biosynthesis                                    |                |               |                                 | 1.04        | 7.63         | 9.92         | 11.87 |
| WANO14GD9_at   |       |      | 3.2   | 2.2   | SA2701 | SA2469 | SAR2758 | SA2561  | SAV2876 | MW2596 | hisC2      | histidinol-phosphate aminotransferase, putative                         | Amino acid biosynthesis                                    |                |               |                                 |             |              |              |       |
| WANO14GD7_at   | 1.1   | 8.4  | 5.5   | 2.6   | SA2700 | SA2468 | SAR2757 | SA2560  | SAV2875 | MW2595 | hisB       | imidazoleglycerol-phosphate dehydratase                                 | Amino acid biosynthesis                                    |                |               |                                 |             |              |              |       |
| WANO14GD5_at   |       |      | 7.0   | 6.0   | SA2699 | SA2467 | SAR2657 | SA2560  | SAV2875 | MW2594 | hisH       | amidotransferase HisG                                                   | Amino acid biosynthesis                                    |                |               |                                 |             |              |              |       |
| WANO14IQ5_at   | 1.6   | 1.2  | 68.6  | 37.2  | SA2696 | SA2466 | SAR2754 | SA2567  | SAV2872 | MW2591 | hisI       | phosphoribosyl-ATP pyrophosphatase/phosphoribosyl-AMP cyclodextrase     | Amino acid biosynthesis                                    |                |               |                                 | -1.34       | 42.40        | 23.02        | 9.39  |
| WANO14IDR_at   | 1.5   | 18.6 | 13.3  | 7.9   | SA2697 | SA2465 | SAR2755 | SA2568  | SAV2873 | MW2592 | hisF       | imidazoleglycerol phosphate synthase, cyclase subunit                   | Amino acid biosynthesis                                    |                |               |                                 |             |              |              |       |
| WANO14QD3_at   | 1.0   | 0.8  | 7.7   | 5.1   | SA2698 | SA2466 | SAR2756 | SA2569  | SAV2874 | MW2593 | hisA       | phosphoribosylformimino-5-aminoimidazole carboxamide ribotide isomerase | Amino acid biosynthesis                                    |                |               |                                 | -1.13       | 8.11         | 5.32         | 2.37  |
| WANO14GDF_at   | 1.3   | 4.1  | 2.7   | 1.6   | SA2704 | SA2472 | SAR2762 | SA2565  | SAV2880 | MW2599 | hisZ       | ATP phosphoribosyltransferase                                           | Amino acid biosynthesis                                    |                |               |                                 |             |              |              |       |
| WANO14GDC_at   | 0.7   | 1.9  | 1.2   | 0.9   | SA2703 | SA2471 | SAR2761 | SA2564  | SAV2879 | MW2598 | hisG       | ATP phosphoribosyltransferase                                           | Amino acid biosynthesis                                    |                |               |                                 |             |              |              |       |
| WANO14G4I_at   |       |      | 31.0  | 21.7  | SA2049 | SA1865 | SAR2147 | SA2195  | SAV2060 | MW1984 | leuD       | 3-isopropylmalate dehydratase, small subunit                            | Amino acid biosynthesis                                    |                |               |                                 |             |              |              |       |
| WANO14G4J_at   |       |      | 29.1  | 24.7  | SA2045 | SA1861 | SAR2143 | SA2191  | SAV2056 | MW1980 | ivC        | ketol-acid reductoisomerase                                             | Amino acid biosynthesis                                    |                |               |                                 |             |              |              |       |
| WANO14G4A_at   | 1.2   | 0.8  | 48.0  | 38.6  | SA2048 | SA1864 | SAR2146 | SA2194  | SAV2059 | MW1983 | leuC       | 3-isopropylmalate dehydratase, large subunit                            | Amino acid biosynthesis                                    |                |               |                                 |             |              |              |       |
| WANO14G46_at   | 1.6   | 54.1 | 50.0  | 28.9  | SA2046 | SA1862 | SAR2144 | SA2192  | SAV2057 | MW1981 | leuA       | 2-isopropylmalate synthase                                              | Amino acid biosynthesis                                    |                |               |                                 | -1.52       | 40.09        | 32.19        | 17.94 |
| WANO14G4M_at   | 1.0   | 3.0  | 33.0  | 26.0  | SA2050 | SA1866 | SAR2148 | SA2196  | SAV2061 | MW1985 | ivA        | threonine dehydratase, biosynthetic, putative                           | Amino acid biosynthesis                                    |                |               |                                 |             |              |              |       |
| WANO14G4O_at   | 2.7   | 2.1  | 86.8  | 75.0  | SA2043 | SA1859 | SAR2141 | SA2193  | SAV2054 | MW1978 | ivB        | acetylacetyl synthase, large subunit, biosynthetic type                 | Amino acid biosynthesis                                    |                |               |                                 | -1.29       | 31.68        | 27.71        | 16.14 |
| WANO14G4I_at   | 1.3   | 0.9  | 33.5  | 32.7  | SA2044 | SA1860 | SAR2145 | SA2195  | SAV2055 | MW1979 | ivN        | acetylacetyl synthase, small subunit                                    | Amino acid biosynthesis                                    |                |               |                                 | -1.44       | 28.34        | 25.70        | 14.23 |
| WANO14G4E_at   | 1.5   | 37.2 | 36.0  | 25.8  | SA2047 | SA1863 | SAR2145 | SA2193  | SAV2058 | MW1982 | leuE       | 3-isopropylmalate dehydrogenase                                         | Amino acid biosynthesis                                    |                |               |                                 |             |              |              |       |
| WANO14HQX_at   | 1.9   | 1.4  | 72.3  | 76.5  | SA0939 | SA0924 | SAR0938 | SA0935  | SAV0937 | MW0937 | sdhD       | 3-hydroxybutyryl-CoA synthase                                           | Amino acid biosynthesis                                    |                |               |                                 | -2.71       | 24.38        | 23.61        | 16.89 |
| WANO14FYQ_at   | 3.3   | 3.5  | 13.3  | 14.6  | SA1772 | SA1544 | SAR1800 | SA2169  | SAV1723 | MW1665 | serC       | aminotransferase, class V                                               | Amino acid biosynthesis                                    |                |               |                                 | 1.07        | 4.02         | 4.42         | 3.07  |
| WANO14FYS_at   | 5.2   | 7.1  | 19.3  | 19.3  | SA1773 | SA1545 | SAR1801 | SA2169  | SAV1724 | MW1666 | serA       | D-3-phosphoglycerate dehydrogenase                                      | Amino acid biosynthesis                                    |                |               |                                 | 1.38        | 3.74         | 3.74         | 2.85  |
| WANO14HQX_at   | 1.2   | 14.0 | 3.8   | 2.2   | SA0033 | SA0419 | SAR0460 | SA0418  | SAV0460 | MW0415 | mseB       | trans-sulfuration enzyme family protein                                 | Amino acid biosynthesis                                    |                |               |                                 | 16.88       | 3.34         | 1.88         | 2.13  |
| WANO14Q3D_at   | 1.8   | 2.4  | 4.7   | 4.3   | SA0036 | SA0423 | SAR0461 | SA0422  | SAV0461 | MW0416 | mseA       | trans-sulfuration enzyme family protein                                 | Amino acid biosynthesis                                    |                |               |                                 | 1.37        | 2.66         | 2.46         | 2.10  |
| WANO14HCA_at   | 3.9   | 8.2  | 22.0  | 11.6  | SA1709 | SA1487 | SAR1742 | SA2159  | SAV1662 | MW1606 | folC       | folypolyglutamate synthase                                              | Biosynthesis of cofactors, prosthetic groups, and carriers |                |               |                                 | 2.09        | 5.60         | 2.94         | 2.93  |
| WANO14FY6_at   | 3.6   | 4.2  | 12.8  | 8.1   | SA2396 | SA2188 | SAR1982 | SA2183  | SAV1991 | MW1832 | siRb       | uroporphyrinogen III methylase SiRb, putative                           | Biosynthesis of cofactors, prosthetic groups, and carriers |                |               |                                 | 1.19        | 3.57         | 2.24         | 1.47  |
| WANO14H9E_at   | 3.4   | 2.4  | 3.9   | 3.2   | SA1950 | SA1707 | SAR1982 | SA2183  | SAV1991 | MW1832 | coqQ       | cytochrome c heme lyase                                                 | Biosynthesis of cofactors, prosthetic groups, and carriers |                |               |                                 | 1.29        | 2.23         | 2.16         | 1.62  |
| WANO14GXA_at   | 2.0   | 1.1  | 4.6   | 3.4   | SA0491 | SA0410 | SAR0450 | SA0408  | SAV0450 | MW0406 | cofM       | cobalamin synthesis protein, putative                                   | Biosynthesis of cofactors, prosthetic groups, and carriers |                |               |                                 | -1.88       | 2.32         | 1.70         | 2.14  |
| WANO14G83_at   | 0.8   | 0.9  | 1.6   | 1.4   | SA2598 | SA2368 | SAR2662 | SA2468  | SAV2582 | MW2502 | cofN       | cobalamin synthesis protein, putative                                   | Biosynthesis of cofactors, prosthetic groups, and carriers |                |               |                                 | 1.13        | 2.09         | 1.85         | 1.72  |
| WANO14GSN_at   | 9.0   | 23.2 | 23.8  | 23.9  | SA2597 | SA2368 | SAR2661 | SA2468  | SAV2581 | MW2501 | cofO       | 1,4-dihydroxy-2-naphthol octaprenyltransferase, putative                | Biosynthesis of cofactors, prosthetic groups, and carriers |                |               |                                 | 2.87        | 2.63         | 2.64         | 2.78  |
| WANO14GDT_at   | 3.1   | 3.8  | 8.9   | 8.5   | SA2599 | SA2369 | SAR2663 | SA2469  | SAV2583 | MW2503 | cofP       | 1,4-dihydroxy-2-naphthol octaprenyltransferase, putative                | Biosynthesis of cofactors, prosthetic groups, and carriers |                |               |                                 | 1.29        | 2.23         | 2.16         | 1.62  |
| WANO14GDB_at   | 9.1   | 25.2 | 19.7  | 13.2  | SA2616 | SA2334 | SAR2626 | SA2432  | SAV2546 | MW2467 | mvaS       | hydroxymethylglutaryl-CoA synthase, putative                            | Biosynthesis of cofactors, prosthetic groups, and carriers |                |               |                                 | 2.77        | 2.17         | 1.45         | 2.03  |
| WANO14H9C_at   | 8.4   | 10.7 | 38.3  | 31.2  | SA2122 | SA1932 | SAR2218 | SA2203  | SAV2130 | MW2054 | coaW       | panthothenate kinase, putative                                          | Biosynthesis of cofactors, prosthetic groups, and carriers |                |               |                                 | 1.27        | 4.58         | 3.73         | 3.39  |
| WANO14H2Z_at   | 1.1   | 5.4  | 11.7  | 7.4   | SA2065 | SA1898 | SAR2184 | SA2199  | SAV2095 | MW2065 | panA       | sedB protein, putative                                                  | Biosynthesis of cofactors, prosthetic groups, and carriers |                |               |                                 | 1.29        | 3.17         | 2.46         | 3.08  |
| WANO14H9F_at   | 1.0   | 2.0  | 2.6   | 2.6   | SA2174 | SA1537 | SAR1793 | SA2164  | SAV1715 | MW1658 | ihl        | thiazole biosynthesis protein Thl                                       | Biosynthesis of cofactors, prosthetic groups, and carriers |                |               |                                 | 2.00        | 2.62         | 2.72         | 2.20  |
| WANO14GDB_at   | 2.9   | 1.5  | 132.4 | 97.5  | SA2557 | SA2332 | SAR2624 | SA2430  | SAV2544 | MW2465 | similar to | CHAP domain protein                                                     | Cell envelope                                              |                |               |                                 | 3.27        | 45.50        | 33.52        | 29.93 |
| WANO14GMS_at   | 36.7  | 71.8 | 301.8 | 293.2 | SA0723 | SA0620 | SAR0675 | SA0630  | SAV0665 | MW0627 | similar to | LysM domain protein                                                     | Cell envelope                                              |                |               |                                 | 1.95        | 9.22         | 7.99         | 6.41  |
| WANO14H2Y_at   | 1.4   | 1.4  | 4.5   | 3.7   | SA1825 | SA1593 | SAR1857 | SA2169  | SAV1775 | MW1715 | similar to | LysM domain protein                                                     | Cell envelope                                              |                |               |                                 | -1.01       | 2.62         | 2.64         | 2.42  |
| WANO14H4J_at   | 3.5   | 8.0  | 19.2  | 15.7  | SA1825 | SA1593 | SAR1857 | SA2169  | SAV1775 | MW1715 | similar to | N-acetylmuramyl-L-alanine amidase                                       | Cell envelope                                              |                |               |                                 | 2.29        | 5.49         | 4.48         | 4.41  |
| WANO14H4I_at   | 19.5  | 35.9 | 82.6  | 61.6  | SA1791 | SA0938 | SAR0987 | SA0985  | SAV0935 | MW0937 | dlid       | extramembranous protein                                                 | Cell envelope                                              |                |               |                                 | 1.84        | 4.23         | 3.16         | 2.92  |
| WANO14H4K_at   | 16.1  | 35.8 | 61.2  | 53.3  | SA2394 | SA2188 | SAR1982 | SA2183  | SAV1991 | MW1832 | dlid       | extramembranous protein                                                 | Cell envelope                                              |                |               |                                 | 3.28        | 3.30         | 3.33         | 3.33  |
| WANO14H4L_at   | 2.5   | 4.2  | 7.5   | 5.2   | SA0797 | SA0795 | SAR0896 | SA0804  | SAV0834 | MW0816 | dicC       | D-alanyl carrier protein                                                | Cell envelope                                              |                |               |                                 | 1.68        | 3.01         | 2.11         | 1.90  |
| WANO14G08_at   | 1.4   | 2.0  | 3.7   | 2.9   | SA2446 | SA2231 | SAR2532 | SA2334  | SAV2442 | MW2366 | similar to | Nucleoside-diphosphate-sugar epimerase/dehydratase, putative            | Cell envelope                                              |                |               |                                 | 1.41        | 2.55         | 2.03         | 3.11  |
| WANO14G17_s_at | 50.3  | 39.1 | 110.4 | 108.6 | SA1062 | trunca | SAR1026 | SA0988  | SAV1052 | MW0936 | atf        | bifunctional autophagy precursor                                        | Cell envelope                                              |                |               |                                 | -1.29       | 2.19         | 2.16         | 1.64  |
| WANO14H4I_at   | 1.4   | 1.4  | 4.5   | 3.7   | SA1825 | SA1593 | SAR1857 | SA2169  | SAV1775 | MW1715 | similar to | LysM domain protein                                                     | Cell envelope                                              |                |               |                                 | -1.42       | 2.68         | 1.98         | 1.64  |
| WANO14H4J_at   | 19.5  | 35.9 | 82.6  | 61.6  | SA1791 | SA0938 | SAR0987 | SA0985  | SAV0935 | MW0937 | dlid       | extramembranous protein                                                 | Cell envelope                                              |                |               |                                 | 1.29        | 2.19         | 2.16         | 1.64  |
| WANO14H4K_at   | 16.1  | 35.8 | 61.2  | 53.3  | SA2394 | SA2188 | SAR1982 | SA2183  | SAV1991 | MW1832 | dlid       | extramembranous protein                                                 | Cell envelope                                              |                |               |                                 | -1.42       | 2.68         | 1.98         | 1.64  |
| WANO14H4L_at   | 2.5   | 4.2  | 7.5   | 5.2   | SA0797 | SA0795 | SAR0896 | SA0804  | SAV0834 | MW0816 | dicC       | D-alanyl carrier protein                                                | Cell envelope                                              |                |               |                                 | 1.29        | 2.19         | 2.16         | 1.64  |
| WANO14G08_at   | 1.4   | 2.0  | 3.7   | 2.9   | SA2446 | SA2231 | SAR2532 | SA2334  | SAV2442 | MW2366 | similar to | Nucleoside-diphosphate-sugar epimerase/dehydratase, putative            | Cell envelope                                              |                |               |                                 | 1.42        | 2.68         | 1.98         | 1.64  |
| WANO14G17_s_at | 50.3  | 39.1 | 110.4 | 108.6 | SA1062 | trunca |         |         |         |        |            |                                                                         |                                                            |                |               |                                 |             |              |              |       |

| Systematic    | Stat. | Loc   | 30'   | 120'  | 360'   | COL    | N315    | MRSa    | MSSA    | Mu50    | MW129  | GENE NAME | Protein Function                                     | TIGR Main Role                                | TIGR Sub Role                                        | Fold change vs stationary phase |             |              |              |
|---------------|-------|-------|-------|-------|--------|--------|---------|---------|---------|---------|--------|-----------|------------------------------------------------------|-----------------------------------------------|------------------------------------------------------|---------------------------------|-------------|--------------|--------------|
|               |       |       |       |       |        |        |         |         |         |         |        |           |                                                      |                                               |                                                      | LB                              | 30' in vivo | 120' in vivo | 360' in vivo |
| WANO1410I_at  | 63.3  | 29.7  | 61.1  | 48.1  | 48.9   | SA1069 | SAR1202 | SAS1160 | SAV1226 | MW107   |        |           | conserved hypothetical protein                       | Energy metabolism                             | Other                                                | 1.82                            | 3.75        | 2.95         | 3.00         |
| WANO14H4C_at  | 4.9   | 5.3   | 10.4  | 7.3   | 9.0    | SA0805 | SA0897  | SAR0798 | SA07072 | MW0704  |        |           | glycerate kinase family protein                      | Energy metabolism                             | Other                                                | 1.08                            | 2.13        | 1.49         | 1.85         |
| WANO14H4G_at  | 12.2  | 30.9  | 27.0  | 24.4  | 26.6   | SA1071 | SA1257  | SAR1676 | SAV1426 | MW1479  | accC   |           | acyl-CoA carboxylase, biotin                         | Fatty acid and phospholipid metabolism        | Biosynthesis                                         | 2.10                            | 6.41        | 2.10         | 2.02         |
| WANO14H4VH_at | 5.3   | 16.3  | 78.1  | 80.0  | 85.2   | SA1136 | SA0975  | SAR1100 | SA01061 | SAV1127 | MW1009 |           | conserved hypothetical protein                       | Hypothetical proteins                         | Conserved                                            | 3.06                            | 14.70       | 15.05        | 16.03        |
| WANO14HBR_at  | 29.4  | 64.0  | 253.4 | 243.7 | 324.6  | SA1701 | SA1472  | SAR1726 | SAS1582 | SAV1644 | MW1596 |           | conserved hypothetical protein                       | Hypothetical proteins                         | Conserved                                            | 2.18                            | 8.62        | 8.29         | 11.04        |
| WANO14FTV_at  | 4.5   | 8.2   | 25.9  | 21.0  | 18.6   | SA1380 | SA1179  | SAR1355 | SAS1284 | SAV1344 | MW1231 |           | conserved hypothetical protein                       | Hypothetical proteins                         | Conserved                                            | 1.81                            | 5.71        | 4.64         | 4.11         |
| WANO14H4T_at  | 4.1   | 5.5   | 22.9  | 24.1  | 17.3   | SA0639 | SA0550  | SAR0599 | SA05052 | SAV0593 | MW0548 |           | conserved hypothetical protein                       | Hypothetical proteins                         | Conserved                                            | 1.35                            | 5.68        | 5.80         | 4.23         |
| WANO14G2D_at  | 1.3   | 1.8   | 6.7   | 7.5   | 5.9    | SA2477 | SA2256  | SAR2555 | SAS2359 | SAV2468 | MW2392 |           | conserved hypothetical protein                       | Hypothetical proteins                         | Conserved                                            | 5.27                            | 5.93        | 4.64         | 4.64         |
| WANO14G2G_at  | 1.8   | 8.6   | 8.7   | 7.2   | SA2478 | SA2257 | SAR2556 | SAS2360 | SAV2469 | MW2393  |        |           | conserved hypothetical protein                       | Hypothetical proteins                         | Conserved                                            | 4.67                            | 4.74        | 4.76         | 3.99         |
| WANO14G2J_at  | 2.5   | 7.0   | 10.5  | 9.6   | 9.7    | SA0497 | SAR0745 | SA03657 | SAV0592 | MW0654  |        |           | Membrane protein                                     | Hypothetical proteins                         | Conserved                                            | 2.80                            | 4.22        | 3.57         | 3.55         |
| WANO14FXC_at  | 6.7   | 17.1  | 26.5  | 17.7  | 12.3   | SA2371 | SA2163  | SAR2462 | SAS2265 | SAV2373 | MW2295 |           | conserved hypothetical protein                       | Hypothetical proteins                         | Conserved                                            | 2.53                            | 3.93        | 2.62         | 1.82         |
| WANO14GNJ_at  | 3.5   | 8.9   | 13.4  | 11.5  | 12.0   | SA0752 | SA0648  | SAR0746 | SA03658 | SAV0693 | MW0655 |           | conserved hypothetical protein                       | Hypothetical proteins                         | Conserved                                            | 2.84                            | 3.82        | 3.28         | 3.42         |
| WANO14H4PH_at | 4.7   | 5.8   | 15.4  | 12.2  | 11.7   | SA1925 | SA1894  | SAR1957 | SAS1189 | SAV1967 | MW1937 |           | conserved hypothetical protein                       | Hypothetical proteins                         | Conserved                                            | 1.24                            | 2.99        | 2.61         | 2.60         |
| WANO14HF6_at  | 3.1   | 5.1   | 8.0   | 7.1   | 8.8    | SA1763 | SA1536  | SAR1792 | SAS1641 | SAV1714 | MW1657 |           | conserved hypothetical protein                       | Hypothetical proteins                         | Conserved                                            | 1.61                            | 2.55        | 2.25         | 2.80         |
| WANO14GMZ_at  | 7.7   | 9.7   | 18.5  | 20.5  | 13.3   |        |         | SAR2093 | SAS1912 | SAV1992 | MW1929 |           | conserved hypothetical protein                       | Hypothetical proteins                         | Conserved                                            | 1.26                            | 2.41        | 2.66         | 1.73         |
| WANO14H0X_at  | 3.6   | 5.7   | 8.0   | 8.0   | 6.4    | SA1501 | SA1294  | SAR1472 | SAS1404 | SAV1451 | MW1351 |           | conserved hypothetical protein                       | Hypothetical proteins                         | Conserved                                            | 1.67                            | 2.23        | 2.22         | 1.78         |
| WANO14H28_at  | 12.3  | 8.0   | 27.0  | 26.1  | 26.0   | SA1526 | SA1316  | SAR1453 | SAS1425 | SAV1485 | MW1373 |           | conserved hypothetical protein                       | Hypothetical proteins                         | Conserved                                            | -1.54                           | 2.19        | 2.11         | 2.11         |
| WANO14FUX_at  | 4.0   | 14.1  | 8.2   | 8.8   | 8.8    | SA2306 | SA2106  | SAR2397 | SAS2206 | SAV2313 | MW2234 |           | abortive infection protein family                    | Hypothetical proteins                         | Conserved                                            | 3.56                            | 2.08        | 2.22         | 2.22         |
| WANO14HWC_at  | 1.6   | 2.5   | 3.3   | 2.2   | 2.6    | SA2052 | SA1867  | SAR2150 | SAS1967 | SAV2062 | MW1986 |           | sprt protein, putative                               | Hypothetical proteins                         | Conserved                                            | 1.85                            | 2.06        | 1.40         | 1.67         |
| WANO14H4E_at  | 4.7   | 9.8   | 9.4   | 7.8   | 11.1   | SA1286 | SA1110  | SAR1243 | SAS1201 | SAV1267 | MW1150 |           | conserved hypothetical protein                       | Hypothetical proteins                         | Conserved                                            | -1.24                           | 2.02        | 1.68         | 2.38         |
| WANO14HWC_at  | 0.9   | 0.9   | 6.5   | 8.4   | 10.0   | SA2051 |         |         |         |         |        |           | hypothetical protein                                 | Hypothetical proteins                         | Not Conserved                                        | -10.05                          | 7.14        | 9.21         | 11.00        |
| WANO14H0D_at  | 11.0  | 26.4  | 62.3  | 58.7  | 49.3   | SA1482 | SA1276  | SAR1455 | SAS1386 | SAV1443 | MW1332 |           | hypothetical protein                                 | Hypothetical proteins                         | Not Conserved                                        | 2.39                            | 5.64        | 5.31         | 4.46         |
| WANO14G2Y_at  | 1.3   | 1.4   | 6.5   | 6.1   | 2.5    | SA2895 |         |         |         |         |        |           | hypothetical protein                                 | Hypothetical proteins                         | Not Conserved                                        | 6.5                             | 4.93        | 4.61         | 1.88         |
| WANO14BGT_at  | 7.7   | 8.5   | 30.1  | 28.6  | 19.9   | SA2158 | SA1971  | SAR2259 | SAS2069 | SAV2167 | MW2094 | sePA      | hypothetical protein                                 | Hypothetical proteins                         | Not Conserved                                        | 1.10                            | 3.90        | 3.70         | 2.58         |
| WANO14IF6_at  | 5.1   | 8.9   | 15.2  | 15.8  | 11.9   | SA1307 | SA1130  | SAR1264 | SAS1222 | SAV1288 | MW1171 |           | hypothetical protein                                 | Hypothetical proteins                         | Not Conserved                                        | 1.75                            | 2.98        | 3.10         | 2.33         |
| WANO14BPBU_at | 1.2   | 0.8   | 3.3   | 3.0   | 2.8    | SA0674 |         |         |         |         |        |           | hypothetical protein                                 | Hypothetical proteins                         | Not Conserved                                        | -1.44                           | 2.85        | 2.63         | 2.39         |
| WANO14BQD_at  | 17.6  | 17.6  | 47.5  | 47.5  | 63.3   | SA2060 |         |         |         |         |        |           | hypothetical protein                                 | Hypothetical proteins                         | Not Conserved                                        | -10.28                          | 2.70        | 1.69         | 1.69         |
| WANO14GNZ_at  | 3.4   | 3.9   | 8.0   | 7.1   | 6.6    | SA0769 | SA0664  | SAR0762 | SAS0674 | SAV0709 | MW0671 |           | hypothetical protein                                 | Hypothetical proteins                         | Not Conserved                                        | 1.16                            | 2.35        | 2.08         | 1.94         |
| WANO14FTR_at  | 5.2   | 12.5  | 12.1  | 11.7  | 12.5   | SA1378 | SA1178  | SAR1353 | SAS1283 | SAV1343 | MW1230 |           | hypothetical protein                                 | Hypothetical proteins                         | Not Conserved                                        | 2.40                            | 2.31        | 2.25         | 2.38         |
| WANO14HTT_at  | 37.7  | 73.8  | 85.4  | 101.0 | 66.6   | SA2134 | SA1944  | SAR2230 | SAS2045 | SAV2142 | MW2066 |           | hypothetical protein                                 | Hypothetical proteins                         | Not Conserved                                        | 1.96                            | 2.27        | 2.68         | 1.77         |
| WANO14FTT_at  | 1.4   | 1.4   | 6.5   | 7.5   | 7.5    | SA1079 |         |         |         |         |        |           | hypothetical protein                                 | Hypothetical proteins                         | Not Conserved                                        | 2.58                            | 2.23        | 2.58         | 2.33         |
| WANO14GRO_at  | 1.4   | 1.8   | 3.0   | 3.0   | 3.5    | SA0948 | SA0806  | SAR0907 | SAS0815 | SAV0945 | MW0827 |           | hypothetical protein                                 | Hypothetical proteins                         | Not Conserved                                        | -1.72                           | 2.13        | 2.56         | 2.49         |
| WANO14GL4_at  | 2.1   | 7.8   | 32.8  | 33.3  | 41.4   | #N/A   |         |         |         |         |        |           | hypothetical protein                                 | Hypothetical proteins                         | Role category not yet assigned                       | 3.68                            | 15.41       | 15.66        | 19.46        |
| WANO14H3B_at  | 17.7  | 17.7  | 48.5  | 48.5  | 18.2   | #N/A   |         |         |         |         |        |           | hypothetical protein                                 | Hypothetical proteins                         | Role category not yet assigned                       | 17.8                            | 18.2        | 15.4         | 15.4         |
| WANO14GQU x a | 37.4  | 28.0  | 196.7 | 204.4 | 151.1  | #N/A   |         |         |         |         |        |           | hypothetical protein                                 | Hypothetical proteins                         | Role category not yet assigned                       | -1.33                           | 5.26        | 5.47         | 4.04         |
| WANO14GLG_at  | 3.0   | 1.6   | 13.6  | 13.3  | 16.9   | #N/A   |         |         |         |         |        |           | hypothetical protein                                 | Hypothetical proteins                         | Role category not yet assigned                       | -1.91                           | 4.59        | 4.48         | 5.70         |
| WANO14BUJL_at | 2.3   | 2.7   | 8.0   | 8.5   | 2.3    | #N/A   |         |         |         |         |        |           | hypothetical protein                                 | Hypothetical proteins                         | Role category not yet assigned                       | 1.19                            | 3.40        | 3.72         | 5.39         |
| WANO14CTN_at  | 2.5   | 1.3   | 0.9   | 0.8   | 1.3    |        |         |         |         | SAV1949 |        |           | hypothetical protein                                 | Hypothetical proteins                         | Role category not yet assigned                       | 4.8                             | 1.3         | 2.58         | 1.77         |
| WANO14GPT_at  | 2.3   | 7.4   | 5.7   | 8.5   | 11.9   | #N/A   |         |         |         |         |        |           | hypothetical protein                                 | Hypothetical proteins                         | Role category not yet assigned                       | 3.28                            | 2.53        | 3.77         | 5.30         |
| WANO14GKZ_at  | 7.5   | 4.0   | 19.6  | 17.2  | 19.6   | SA1756 |         |         |         |         |        |           | truncated amidase-related protein                    | Mobile and extrachromosomal element functions | Prophage functions                                   | -1.88                           | 2.63        | 2.30         | 2.63         |
| WANO14HF7_at  | 15.1  | 15.1  | 47.6  | 47.6  | 6.6    | SA0750 |         |         |         |         |        |           | transposase, degenerate                              | Mobile and extrachromosomal element functions | Transposon functions                                 | 2.5                             | 2.50        | 2.63         | 1.61         |
| WANO14FUU_at  | 2.9   | 7.9   | 6.4   | 5.2   | 4.5    |        |         | SA0375  |         | SAV2150 | MW2074 |           | hypothetical protein                                 | Mobile and extrachromosomal element functions | No Data                                              | 2.74                            | 2.21        | 1.80         | 1.58         |
| WANO14H3D_at  | 10.7  | 26.4  | 32.1  | 27.0  | 27.4   | SA1721 | SA1498  | SAR1754 | SAS1603 | SAV1674 | MW1618 | clpX      | ATP-dependent Clp protease, ATP-binding subunit ClpX | Protein fate                                  | Degradation of proteins, peptides, and glycopeptides | 2.47                            | 3.01        | 2.53         | 2.57         |
| WANO14H9V_at  | 8.7   | 11.4  | 22.7  | 19.7  | 16.2   | SA1867 | SA1440  | SAR1891 | SAS1548 | SAV1612 | MW1562 |           | peptidase, U32 family                                | Protein fate                                  | Degradation of proteins, peptides, and glycopeptides | 1.30                            | 2.80        | 2.28         | 1.86         |
| WANO14H9W_at  | 4.0   | 3.7   | 9.9   | 7.0   | 6.7    | SA1668 | SA1441  | SAR1692 | SAS1549 | SAV1613 | MW1563 | pepU32    | peptidase, U32 family                                | Protein fate                                  | Degradation of proteins, peptides, and glycopeptides | 6.18                            | 2.41        | 1.73         | 1.68         |
| WANO14H3W_at  | 4.3   | 11.0  | 9.4   | 9.5   | 11.9   | SA1281 | SA1105  | SAR1238 | SAS1196 | SAV1262 | MW1145 |           | membrane-associated zinc metalloprotease, putative   | Protein fate                                  | Degradation of proteins, peptides, and glycopeptides | 2.58                            | 2.21        | 2.24         | 2.79         |
| WANO14FTG_at  | 1.4   | 1.6   | 3.0   | 2.7   | 2.6    | SA1373 | SA1173  | SAR1348 | SAS1278 | SAV1338 | MW1225 |           | SCP-like extracellular protein                       | Protein fate                                  | Degradation of proteins, peptides, and glycopeptides | 1.22                            | 2.19        | 1.98         | 1.90         |
| WANO14FMR_at  | 12.2  | 14.0  | 25.8  | 25.7  | 26.2   | SA0885 | SA0695  | SAR0885 | SAS0695 | SAV0910 | MW0910 |           | protease, putative                                   | Protein fate                                  | Degradation of proteins, peptides, and glycopeptides | 25.0                            | 25.0        | 25.0         | 25.0         |
| WANO14HKZ_at  | 10.0  | 22.3  | 41.0  | 28.8  | 26.5   | SA0968 | SA0825  | SAR0926 | SAS0834 | SAV0964 | MW0846 | spSA      | signal peptidase I                                   | Protein fate                                  | Protein and peptide secretion and trafficking        | 2.14                            | 3.93        | 2.76         | 2.54         |
| WANO14HL2_at  | 18.6  | 41.3  | 60.0  | 51.6  | 47.1   | SA0969 | SA0826  | SAR0927 | SAS0835 | SAV0965 | MW0847 | spSB      | signal peptidase I                                   | Protein fate                                  | Protein and peptide secretion and trafficking        | 2.22                            | 3.22        | 2.77         | 2.52         |
| WANO14H2Z_at  | 68.5  | 118.2 | 214.5 | 215.3 | 284.4  | SA2219 | SA2028  | SAR2315 | SAS2121 | SAV2230 | MW2149 | secY      | preproteins translocase, SecY subunit                | Protein fate                                  | Protein and peptide secretion and trafficking        | 7.73                            | 3.13        | 3.14         | 4.15         |
| WANO14H2J_at  | 1.1   | 1.1   | 17.7  | 17.7  | 17.7   | SA1499 | SA1169  | SAR1755 | SAS1604 | SAV1675 | MW1619 | lig       | ligase                                               | Protein fate                                  | Protein and peptide secretion and trafficking        | 18.3                            | 14.4        | 24.9         | 23.9         |
| WANO14H1R_at  | 3.7   | 8.2   | 9.3   | 10.9  | 10.2   | SA0417 | SA0334  |         |         |         |        |           | MTB family protein                                   | Protein fate                                  | Protein and peptide secretion and trafficking        | 1.78                            | 2.17        | 2.02         | 2.73         |
| WANO14H8B_at  | 28.1  | 60.3  | 56.9  | 49.4  | 54.9   | SA1692 | SA1463  | SAR1717 | SAS1573 | SAV1637 | MW1637 |           | protein-export membrane protein, SecDF family        | Protein fate                                  | Protein and peptide secretion and trafficking        | 2.14                            | 2.02        | 1.75         | 1.95         |
| WANO14H0L_at  | 17.7  | 12.6  | 47.5  | 35.3  | 29.1   | SA2109 | SA1919  | SAR2205 | SAS2020 | SAV2117 | MW2041 |           | modification methylase, HemK family                  | Protein fate                                  | Protein modification and repair                      | 1.63                            | 6.14        | 4.56         | 3.76         |
| WANO14H4J_at  | 19.8  | 19.8  | 59.7  | 59.7  | 36.7   | SA1067 | SA0967  | SAR1067 | SAS0967 | SAV1067 | MW1067 | def       | glycopeptide deformylase                             | Protein fate                                  | Protein modification and repair                      | 2.40                            | 2.45        | 2.45         | 2.45         |
| WANO14H4I_at  | 15.7  | 16.1  | 33.2  | 23.9  | 46.5   | SA0635 | SA0546  | SAR0595 | SAS0548 | SAV0589 | MW0544 |           | lipote-protein ligase A                              | Protein fate                                  | Protein modification and repair                      | 2.94                            | 2.12        | 1.53         | 2.97         |
| WANO14HEA_at  | 20.5  | 13.3  | 50.3  | 28.7  | 20.7   | SA0947 | SA0736  | SAR0837 | SA07047 | SAV0873 | mpbB   |           | SerA-binding protein                                 | Protein synthesis                             | Other                                                | -1.55                           | 2.45        | 1.40         | 1.01         |
| WANO14HDC_at  | 9.6   | 16.2  | 180.1 | 153.2 | 135.3  | SA1503 | SAR1759 | SAS1608 | SAV1679 | MW1623  | rpmI   |           | ribosomal protein L35                                | Protein synthesis                             | Ribosomal proteins: synthesis and modification       | 1.68                            | 18.74       | 15.94        | 14.08        |
| WANO14HDA_at  | 6.8   | 10.8  | 112.9 | 89.6  | 73.8   | SA1725 | SA1     |         |         |         |        |           |                                                      |                                               |                                                      |                                 |             |              |              |

| Systematic     | Stat. | Loc   | 30'   | 120'  | 360'  | COL     | N315   | MRSa    | MSSA    | Mu50    | MW2    | GENE NAME | Protein Function                                                           | TIGR Main Role                                     | TIGR Sub Role                                  | Fold change vs stationary phase |             |              |              |
|----------------|-------|-------|-------|-------|-------|---------|--------|---------|---------|---------|--------|-----------|----------------------------------------------------------------------------|----------------------------------------------------|------------------------------------------------|---------------------------------|-------------|--------------|--------------|
|                |       |       |       |       |       |         |        |         |         |         |        |           |                                                                            |                                                    |                                                | LB                              | 30' in vivo | 120' in vivo | 360' in vivo |
| WANO14H29_at   | 50.3  | 84.9  | 194.6 | 163.2 | 187.1 | SA0583  | SA0495 | SAR0542 | SAS0495 | SAV0537 | MW0492 | rPK       | ribosomal protein L11                                                      | Protein synthesis                                  | Ribosomal proteins: synthesis and modification | 1.69                            | 3.86        | 3.24         | 3.72         |
| WANO14H8_at    | 24.6  | 57.3  | 90.0  | 86.2  | 93.0  | SA2212  | SA2022 | SAR2308 | SAS2114 | SAV2223 | MW2142 | rPQ       | ribosomal protein L17                                                      | Protein synthesis                                  | Ribosomal proteins: synthesis and modification | 2.34                            | 3.66        | 2.70         | 3.79         |
| WANO14H90_at   | 107.6 | 269.4 | 603.3 | 642.9 | 904.4 | SA11700 | SA1471 | SAR1272 | SAS1645 | SAV1596 | MW1596 | rPnA      | ribosomal protein L27                                                      | Protein synthesis                                  | Ribosomal proteins: synthesis and modification | 1.61                            | 3.34        | 3.64         | 5.40         |
| WANO14H95_at   | 17.3  | 36.2  | 52.7  | 45.1  | 63.1  | SA2215  | SA2025 | SAR2311 | SAS2117 | SAV2226 | MW2145 | rPmJ      | ribosomal protein L36                                                      | Protein synthesis                                  | Ribosomal proteins: synthesis and modification | 2.10                            | 3.05        | 2.61         | 3.65         |
| WANO14H96_at   | 69.5  | 147.6 | 210.4 | 173.3 | 285.9 | SA2214  | SA2024 | SAR2310 | SAS2116 | SAV2225 | MW2144 | rPsk      | ribosomal protein S11                                                      | Protein synthesis                                  | Ribosomal proteins: synthesis and modification | 2.12                            | 3.03        | 2.49         | 4.11         |
| WANO14F4U_at   | 43.3  | 11.2  | 12.5  | 11.1  | 14.6  | SA1842  | SA1414 | SAR1863 | SAS1523 | SAV1586 | MW1537 | rPst      | ribosomal protein S20                                                      | Protein synthesis                                  | Ribosomal proteins: synthesis and modification | 2.59                            | 2.89        | 2.57         | 3.37         |
| WANO14H94_at   | 3.9   | 8.8   | 10.5  | 11.1  | 13.2  | SA1608  | SA0047 | SAR1628 | SAS1489 | SAV1551 | MW1503 | rPmC      | ribosomal protein L33                                                      | Protein synthesis                                  | Ribosomal proteins: synthesis and modification | 2.25                            | 2.67        | 2.84         | 3.38         |
| WANO14G0M_at   | 1.6   | 4.6   | 9.3   | 6.6   | 5.8   | SA0789  | SA0883 | SAR0782 | SAS0693 | SAV0728 | MW0690 |           | 7-aminomethyl-7-carbaguanine:NADP+ oxidoreductase                          | Protein synthesis                                  | RNA and RNA modification                       | 2.97                            | 5.94        | 4.19         | 3.73         |
| WANO14HDE_at   | 5.6   | 6.9   | 77.4  | 71.0  | 79.0  | SA1727  | SA1504 | SAR1760 | SAS1609 | SAV1628 | MW1624 | inFC      | translation initiation factor IF-3                                         | Protein synthesis                                  | Translation factors                            | 1.21                            | 13.71       | 12.98        | 14.00        |
| WANO14H4U_at   | 5.7   | 10.3  | 175.4 | 186.3 | 126.1 | SA11918 | SA0093 | SAR1035 | SAS1044 | SAV1109 | MW0692 | tyPA      | elongation factor Tu family                                                | Protein synthesis                                  | Translation factors                            | 1.90                            | 13.14       | 11.53        | 12.03        |
| WANO14H2V_at   | 18.2  | 44.4  | 78.6  | 63.9  | 80.8  | SA2217  | SA2026 | SAR2313 | SAS2119 | SAV2228 | MW2147 | inFA      | translation initiation factor IF-1                                         | Protein synthesis                                  | Translation factors                            | 2.44                            | 4.32        | 3.51         | 4.44         |
| WANO14H4ZU_at  | 80.7  | 173.0 | 285.0 | 285.4 | 383.4 | SA0593  | SA0505 | SAR0552 | SAS0505 | SAV0547 | MW0502 | fusA      | translation elongation factor G                                            | Protein synthesis                                  | Translation factors                            | 2.15                            | 3.53        | 3.54         | 4.75         |
| WANO14H0N_at   | 5.5   | 8.1   | 16.4  | 13.0  | 10.7  | SA2110  | SA1920 | SAR2206 | SAS2021 | SAV2118 | MW2042 | pPA       | peptide chain release factor 1                                             | Protein synthesis                                  | Translation factors                            | 1.47                            | 2.97        | 2.35         | 1.93         |
| WANO14H4E_at   | 36.1  | 29.5  | 82.9  | 84.2  | 72.6  | SA1298  | SA1192 | SAR1245 | SAS1203 | SAV1289 | MW1152 | inFB      | translation initiation factor IF-2                                         | Protein synthesis                                  | Translation factors                            | 1.74                            | 2.18        | 1.69         | 1.91         |
| WANO14HAX_at   | 1.1   | 4.4   | 11.4  | 9.7   | 8.9   | SA1686  | SA1457 | SAR1711 | SAS1567 | SAV1631 | MW1581 | hisS      | hisidyl-tyrosine synthetase                                                | Protein synthesis                                  | RNA aminoacylation                             | 3.96                            | 10.33       | 8.84         | 8.11         |
| WANO14HCD_at   | 7.4   | 16.7  | 50.5  | 36.5  | 26.7  | SA1710  | SA1488 | SAR1743 | SAS1592 | SAV1663 | MW1607 | valS      | valyl-tyrosine synthetase                                                  | Protein synthesis                                  | RNA aminoacylation                             | 2.26                            | 6.82        | 4.93         | 3.47         |
| WANO14H0I_at   | 5.1   | 2.7   | 7.5   | 6.3   | 8.3   | SA1808  | SA1579 | SAR1643 | SAS1684 | SAV1750 | MW1701 | leuS      | leucyl-tyrosine synthetase                                                 | Protein synthesis                                  | RNA aminoacylation                             | 5.15                            | 4.94        | 3.42         | 2.99         |
| WANO14BZZL_at  | 10.5  | 58.5  | 42.8  | 36.2  | 37.8  |         |        | SAR1169 | SAS1127 | SAV1193 | MW1076 | ileS      | isoleucyl-tyrosine synthetase                                              | Protein synthesis                                  | RNA aminoacylation                             | 5.57                            | 4.07        | 3.45         | 3.60         |
| WANO14H2U_s_at | 7.7   | 4.0   | 24.4  | 21.1  | 24.6  | SA1206  | SA1036 | SAR1169 | SAS1127 | SAV1193 | MW1076 | ileS      | isoleucyl-tyrosine synthetase                                              | Protein synthesis                                  | RNA aminoacylation                             | 5.21                            | 3.18        | 2.76         | 3.20         |
| WANO14H3Y_at   | 4.8   | 12.2  | 11.1  | 9.9   | 10.6  | SA1282  | SA1106 | SAR1239 | SAS1197 | SAV1263 | MW1146 | proS      | prolyl-tyrosine synthetase                                                 | Protein synthesis                                  | RNA aminoacylation                             | 2.54                            | 2.32        | 2.06         | 2.21         |
| WANO14HFN_at   | 1.6   | 3.9   | 3.3   | 3.5   | 3.3   | SA1778  | SA1550 | SAR1806 | SAS1655 | SAV1729 | MW1071 | tyrS      | tyrosyl-tyrosine synthetase                                                | Protein synthesis                                  | RNA aminoacylation                             | 2.51                            | 2.41        | 2.06         | 2.14         |
| WANO14GJG_at   | 7.7   | 12.0  | 11.0  | 99.8  | 94.5  |         |        |         |         |         |        |           | RNA-Met                                                                    | Protein synthesis                                  | RNA and RNA base modification                  | 1.55                            | 13.17       | 10.91        | 12.22        |
| WANO14H4I_at   | 52.5  | 64.6  | 585.5 | 617.8 | 479.4 |         |        |         |         |         |        |           | RNA-Pro                                                                    | Protein synthesis                                  | RNA and RNA base modification                  | 1.23                            | 11.15       | 11.77        | 9.13         |
| WANO14GJC_at   | 18.4  | 25.2  | 199.1 | 191.1 | 173.9 |         |        |         |         |         |        |           | RNA-Cys                                                                    | Protein synthesis                                  | RNA and RNA base modification                  | 1.90                            | 13.14       | 10.41        | 3.48         |
| WANO14H2R_at   | 12.2  | 60.0  | 116.4 | 128.5 | 122.3 |         |        |         |         |         |        |           | RNA-Thr                                                                    | Protein synthesis                                  | RNA and RNA base modification                  | 2.13                            | 9.55        | 10.54        | 10.04        |
| WANO14H2H_at   | 5.0   | 4.3   | 43.9  | 33.8  | 21.5  | SA0587  | SA0499 | SAR0546 | SAS0499 | SAV0541 | MW0496 |           | Methyltransferase small domain                                             | Protein synthesis                                  | RNA and RNA base modification                  | -1.15                           | 8.78        | 6.76         | 4.30         |
| WANO14H9R_at   | 35.8  | 103.4 | 245.2 | 257.6 | 229.5 |         |        |         |         |         |        |           | RNA-Lys                                                                    | Protein synthesis                                  | RNA and RNA base modification                  | 2.89                            | 6.86        | 7.20         | 6.42         |
| WANO14H2I_at   | 11.8  | 2.7   | 11.8  | 8.3   |       |         |        | SAR1216 | SAS1174 | SAV1240 | MW1123 |           | RNA-(guanine-N1)-methyltransferase                                         | Protein synthesis                                  | RNA and RNA base modification                  | 1.83                            | 3.54        | 3.46         | 4.21         |
| WANO14H1T_x_at | 60.9  | 80.3  | 383.4 | 409.7 | 443.7 |         |        |         |         |         |        |           | RNA-Leu                                                                    | Protein synthesis                                  | RNA and RNA base modification                  | 1.32                            | 6.30        | 7.73         | 7.29         |
| WANO14H02_at   | 1.9   | 2.6   | 11.1  | 7.9   | 8.0   | SA1483  | SA1277 | SAR1456 | SAS1387 | SAV1444 | MW1333 |           | Putative RNA methylase family UFP0020                                      | Protein synthesis                                  | RNA and RNA base modification                  | 1.41                            | 5.91        | 4.18         | 4.23         |
| WANO14H9D_x_at | 57.2  | 78.0  | 333.2 | 361.2 | 456.0 |         |        |         |         |         |        |           | RNA-Leu                                                                    | Protein synthesis                                  | RNA and RNA base modification                  | 1.36                            | 5.62        | 6.31         | 7.97         |
| WANO14H9E_at   | 86.7  | 154.5 | 430.1 | 531.0 | 609.1 |         |        |         |         |         |        |           | RNA-Arg                                                                    | Protein synthesis                                  | RNA and RNA base modification                  | 1.74                            | 4.58        | 5.89         | 6.87         |
| WANO14H9J_at   | 125.2 | 144.8 | 559.9 | 607.7 | 600.3 |         |        |         |         |         |        |           | RNA-Ile                                                                    | Protein synthesis                                  | RNA and RNA base modification                  | 1.16                            | 4.47        | 4.85         | 4.79         |
| WANO14GJJ_at   | 23.2  | 79.1  | 96.7  | 108.7 | 114.0 |         |        |         |         |         |        |           | RNA-Leu                                                                    | Protein synthesis                                  | RNA and RNA base modification                  | 3.54                            | 4.33        | 4.87         | 5.10         |
| WANO14H3A_at   | 8.1   | 19.8  | 31.2  | 30.5  | 37.3  | SA1268  | SA1022 | SAR1227 | SAS1185 | SAV1251 | MW1134 | mFO       | RNA-(guanine-5)-methyltransferase                                          | Protein synthesis                                  | RNA and RNA base modification                  | 2.45                            | 3.96        | 3.76         | 3.68         |
| WANO14HBF_at   | 7.8   | 8.7   | 29.4  | 27.9  | 29.0  | SA1694  | SA1465 | SAR1719 | SAS1575 | SAV1639 | MW1589 | igt       | queanine RNA-ribosyltransferase                                            | Protein synthesis                                  | RNA and RNA base modification                  | 1.11                            | 3.77        | 3.58         | 3.72         |
| WANO14GJD_at   | 144.6 | 97.1  | 513.9 | 546.9 | 451.8 |         |        |         |         |         |        |           | RNA-Gln                                                                    | Protein synthesis                                  | RNA and RNA base modification                  | -1.49                           | 3.55        | 3.78         | 3.12         |
| WANO14H0J_at   | 5.4   | 7.3   | 18.2  | 13.5  | 15.4  | SA1209  | SA1040 | SAR1173 | SAS1131 | SAV1197 | MW1080 |           | ribosomal large subunit pseudouridine synthases, RluD subfamily            | Protein synthesis                                  | RNA and RNA base modification                  | 1.36                            | 3.38        | 2.51         | 2.87         |
| WANO14GJB_at   | 60.6  | 36.2  | 193.3 | 195   | 193.6 |         |        |         |         |         |        |           | RNA-Phe                                                                    | Protein synthesis                                  | RNA and RNA base modification                  | 1.32                            | 3.83        | 3.68         | 3.46         |
| WANO14GJ7_at   | 158.7 | 156.0 | 449.7 | 472.7 | 553.3 |         |        |         |         |         |        |           | RNA-His                                                                    | Protein synthesis                                  | RNA and RNA base modification                  | -1.02                           | 2.83        | 2.98         | 3.49         |
| WANO14GJF_at   | 103.3 | 91.5  | 291.7 | 275.0 | 264.7 |         |        |         |         |         |        |           | RNA-Tyr                                                                    | Protein synthesis                                  | RNA and RNA base modification                  | -1.13                           | 2.82        | 2.86         | 2.56         |
| WANO14GJ6_at   | 171.1 | 108.0 | 416.4 | 488.3 | 610.1 |         |        |         |         |         |        |           | RNA-His                                                                    | Protein synthesis                                  | RNA and RNA base modification                  | 1.58                            | 3.78        | 2.65         | 3.25         |
| WANO14H8C_at   | 3.5   | 3.8   | 8.2   | 7.0   | 6.9   | SA1695  | SA1466 | SAR1720 | SAS1576 | SAV1640 | MW1590 | queA      | S-adenosylmethionine:RNA ribosyltransferase-isomerase                      | Protein synthesis                                  | RNA and RNA base modification                  | 1.11                            | 2.37        | 2.02         | 2.01         |
| WANO14H01_at   | 14.9  | 17.5  | 32.0  | 33.8  | 31.7  | SA1699  | SA1470 | SAR1724 | SAS1580 | SAV1644 | MW1594 | ctgA      | GTP-binding protein, Cbg family GTPase CtgA                                | Protein synthesis                                  | RNA and RNA base modification                  | 1.17                            | 2.14        | 2.27         | 2.12         |
| WANO14H31_at   | 6.7   | 7.7   | 14.2  | 14.1  | 7.8   | SA0907  | SA1688 | SAR1941 | SAS1771 | SAV1850 | MW1791 |           | ribosomal large subunit pseudouridine synthases, RluD subfamily            | Protein synthesis                                  | RNA and RNA base modification                  | 1.16                            | 2.13        | 2.11         | 1.17         |
| WANO14GJ2_at   | 13.5  | 2.3   | 7.2   | 7.9   |       |         |        |         |         |         |        |           | RNA-Arg                                                                    | Protein synthesis                                  | RNA and RNA base modification                  | 7.2                             | 7.19        | 2.07         | 2.83         |
| WANO14H0H_at   | 7.2   | 10.3  | 14.8  | 11.3  | 8.9   | SA1798  | SA1569 | SAR1833 | SAS1674 | SAV1748 | MW1761 |           | RNA (guanine-N7)-methyltransferase                                         | Protein synthesis                                  | RNA and RNA base modification                  | 1.44                            | 2.07        | 1.57         | 1.24         |
| WANO14GJK_at   | 86.9  | 59.5  | 178.9 | 167.6 | 192.0 |         |        |         |         |         |        |           | RNA-Leu                                                                    | Protein synthesis                                  | RNA and RNA base modification                  | -1.55                           | 2.06        | 1.93         | 2.21         |
| WANO14H2A_at   | 3.2   | 5.3   | 6.2   | 5.6   | 4.2   | SA1811  | SA1682 | SAR1846 | SAS1687 | SAV1763 | MW1704 |           | SAM-dependent methyltransferase, MraW methylase family                     | Protein synthesis                                  | RNA and RNA base modification                  | 1.69                            | 2.04        | 1.69         | 2.04         |
| WANO14H2B_at   | 1.1   | 1.2   | 11.9  | 10.4  | 11.9  | SA1371  | SA1172 | SAR1347 | SAS1277 | SAV1337 | MW1224 | gucK      | GMP reductase                                                              | Purines, pyrimidines, nucleosides, and nucleotides | Nucleotide and nucleoside interconversions     | 1.08                            | 10.67       | 11.69        | 10.61        |
| WANO14H5X_at   | 29.4  | 52.8  | 119.4 | 100.1 | 149.0 | SA2218  | SA2027 | SAR2314 | SAS2120 | SAV2229 | MW2148 | adc       | adenylate kinase                                                           | Purines, pyrimidines, nucleosides, and nucleotides | Nucleotide and nucleoside interconversions     | 1.80                            | 4.06        | 3.41         | 5.07         |
| WANO14H0P_at   | 6.1   | 7.9   | 16.1  | 13.6  | 11.8  | SA2111  | SA1921 | SAR2207 | SAS2022 | SAV2119 | MW2043 | tdk       | thymidine kinase                                                           | Purines, pyrimidines, nucleosides, and nucleotides | Nucleotide and nucleoside interconversions     | 1.29                            | 2.64        | 2.23         | 1.94         |
| WANO14H34_at   | 13.3  | 10.4  | 17.6  | 13.3  | 12.5  | SA1078  | SA0922 | SAR1043 | SAS1005 | SAV1069 | MW0952 | purM      | phosphoribosyltransferase                                                  | Purines, pyrimidines, nucleosides, and nucleotides | Purine ribonucleotide biosynthesis             | 2.07                            | 3.31        | 3.45         | 3.21         |
| WANO14H56_at   | 5.9   | 11.9  | 37.5  | 27.1  | 21.4  | SA1083  | SA0926 | SAR1048 | SAS1010 | SAV1074 | MW0957 | purD      | phosphoribosyl-glycylamino-glycine ligase                                  | Purines, pyrimidines, nucleosides, and nucleotides | Purine ribonucleotide biosynthesis             | 2.00                            | 6.31        | 4.57         | 3.60         |
| WANO14H07_at   | 1.5   | 3.6   | 6.9   | 5.6   | 5.1   | SA1080  | SA0923 | SAR1045 | SAS1007 | SAV1071 | MW0954 | purM      | phosphoribosylformylglycinamide cyclase                                    | Purines, pyrimidines, nucleosides, and nucleotides | Purine ribonucleotide biosynthesis             | 2.32                            | 4.49        | 3.67         | 3.33         |
| WANO14H9T_at   | 3.3   | 7.5   | 12.8  | 11.8  | 11.3  | SA1078  | SA0921 | SAR1043 | SAS1005 | SAV1069 | MW0952 | purM      | phosphoribosylformylglycinamide synthase II                                | Purines, pyrimidines, nucleosides, and nucleotides | Purine ribonucleotide biosynthesis             | 2.30                            | 3.94        | 3.62         | 3.46         |
| WANO14H9V_at   | 1.0   | 2.3   | 2.6   | 2.1   | 1.7   | SA1076  | SA0919 | SAR1041 | SAS1003 | SAV1067 | MW0950 | purS      | Purines, pyrimidines, nucleosides, and nucleotides                         | Purine ribonucleotide biosynthesis                 | 1.50                                           | 2.07                            | 2.28        | 2.83         |              |
| WANO14H52_at   | 2.0   | 4.2   | 6.2   | 5.0   | 4.9   | SA1082  | SA0925 | SAR1047 | SAS1009 | SAV1073 | MW0955 | purH      | phosphoribosylaminoimidazolecarboxamide formyltransferase/IMP cyclodiolase | Purines, pyrimidines, nucleosides, and nucleotides | Purine ribonucleotide bios                     |                                 |             |              |              |

| Systematic    | Stat. | Log  | 30'   | 120'  | 360'  | COL    | N315   | MRSA    | MSSA    | Mu50    | MW2    | GENE NAME | Protein Function                                              | TIGR Main Role                 | TIGR Sub Role                              | Fold change vs stationary phase |             |              |              |
|---------------|-------|------|-------|-------|-------|--------|--------|---------|---------|---------|--------|-----------|---------------------------------------------------------------|--------------------------------|--------------------------------------------|---------------------------------|-------------|--------------|--------------|
|               |       |      |       |       |       |        |        |         |         |         |        |           |                                                               |                                |                                            | LB                              | 30' in vivo | 120' in vivo | 360' in vivo |
| WANO14G1X_at  | 2.4   | 3.9  | 5.6   | 6.5   | 5.8   | SA2472 | SA2251 | SAR2550 | SAS2354 | SAV2463 | MW2391 | opp-1F    | peptide ABC transporter, ATP-binding protein                  | Transport and binding proteins | Amino acids, peptides and amines           | 1.64                            | 2.37        | 2.75         | 2.46         |
| WANO14G29_at  | 4.5   | 3.7  | 9.9   | 9.3   | 8.7   | SA2476 | SA2255 | SAR2554 | SAS2358 | SAV2467 | MW2391 | opp-1A    | peptide ABC transporter, peptide-binding protein              | Transport and binding proteins | Amino acids, peptides and amines           | -1.22                           | 2.20        | 2.06         | 1.92         |
| WANO14G27_at  | 4.4   | 3.9  | 9.0   | 9.6   | 8.1   | SA2476 | SA2254 | SAR2553 | SAS2357 | SAV2466 | MW2390 | opp-1B    | peptide ABC transporter, permease protein, putative           | Transport and binding proteins | Amino acids, peptides and amines           | -1.11                           | 2.06        | 2.19         | 1.85         |
| WANO14FXO_at  | 2.8   | 3.9  | 12.9  | 7.2   | 7.2   | SA2386 | SA2176 | SAR2476 | SAS2278 | SAV2388 | MW2308 | narK      | nitrate transporter                                           | Transport and binding proteins | Anions                                     | 1.39                            | 4.67        | 2.62         | 2.60         |
| WANO14H8U_at  | 32.7  | 52.1 | 77.0  | 75.0  | 72.3  | SA0722 | SA0619 | SAR0674 | SAS0629 | SAV0664 | MW0626 |           | phosphate transporter family protein                          | Transport and binding proteins | Anions                                     | 1.60                            | 2.36        | 2.30         | 2.21         |
| WANO14G52_at  | 1.3   | 6.4  | 9.5   | 12.8  | 21.7  | SA2552 | SA2326 | SAR2618 | SAS2424 | SAV2538 | MW2459 | ptsG      | PTS system, glucose-specific component                        | Transport and binding proteins | Carbohydrates, organic alcohols, and acids | 4.88                            | 7.27        | 9.78         | 16.58        |
| WANO14B0JL_at | 3.8   | 20.5 | 23.8  | 19.5  | 16.4  | SA2401 | SA2191 | SAR2493 | SAS2204 | SAV2403 | MW2325 |           | formate/nitrite transporter                                   | Transport and binding proteins | Carbohydrates, organic alcohols, and acids | 5.35                            | 6.22        | 5.08         | 4.29         |
| WANO14FKX_at  | 15.6  | 61.3 | 57.5  | 43.3  | 49.1  | SA2382 | SA2172 | SAR2472 | SAS2274 | SAV2384 | MW2304 | glfT      | sodium:dicarboxylate symporter family                         | Transport and binding proteins | Carbohydrates, organic alcohols, and acids | 3.93                            | 3.69        | 2.78         | 3.15         |
| WANO14H8A_at  | 12.2  | 23.7 | 28.2  | 34.4  | 52.6  | SA0175 | SA0183 | SAR0190 | SAS0164 | SAV0189 | MW0163 | glcA      | PTS system, glucose-specific component                        | Transport and binding proteins | Carbohydrates, organic alcohols, and acids | 1.95                            | 2.31        | 2.82         | 4.31         |
| WANO14G9N_at  | 8.4   | 14.9 | 18.3  | 21.9  | 21.4  | SA2246 | SA2053 | SAR2341 | SAS2147 | SAV2256 | MW2175 |           | sugar transporter, putative                                   | Transport and binding proteins | Carbohydrates, organic alcohols, and acids | 1.77                            | 2.18        | 2.61         | 2.55         |
| WANO14GXN_at  | 2.1   | 15.2 | 132.3 | 147.3 | 102.9 | SA0501 | SA0417 | SAR0458 | SAS0416 | SAV0458 | MW0413 |           | sodium-dependent transporter, putative                        | Transport and binding proteins | Cations                                    | 7.39                            | 64.39       | 71.71        | 50.10        |
| WANO14HP1_at  | 10.4  | 17.5 | 86.9  | 72.2  | 91.1  | SA1026 | SA0878 | SAR0991 | SAS0890 | SAV1022 | MW0902 |           | Integral membrane protein TerC family                         | Transport and binding proteins | Cations                                    | 1.69                            | 8.38        | 6.96         | 8.78         |
| WANO14FCU_at  | 5.2   | 7.6  | 22.3  | 17.2  | 17.4  | SA2277 | SA2079 | SAR2368 | SAS2174 | SAV2284 | MW2202 |           | iron compound ABC transporter, substrate-binding protein      | Transport and binding proteins | Cations                                    | 1.86                            | 4.26        | 3.28         | 3.33         |
| WANO14GTC_at  | 14.8  | 24.8 | 33.9  | 39.4  | 29.7  | SA0098 | SA0100 | SAR0110 | SAS0081 | SAV0104 | MW0080 |           | Na/Pi cotransporter, putative                                 | Transport and binding proteins | Cations                                    | 1.68                            | 2.29        | 2.46         | 2.00         |
| WANO14I31_at  | 2.7   | 4.0  | 21.9  | 25.8  | 23.7  | SA2164 | SA1976 | SAR2265 | SAS2075 | SAV2174 | MW2100 |           | transporter gate domain protein                               | Transport and binding proteins | Cations and iron carrying compounds        | 1.48                            | 8.04        | 9.48         | 8.68         |
| WANO14HKJ_at  | 3.5   | 4.1  | 25.2  | 16.8  | 9.5   | SA0946 | SA0804 | SAR0905 | SAS0813 | SAV0943 | MW0825 |           | Na+/H+ antiporter family protein                              | Transport and binding proteins | Cations and iron carrying compounds        | 1.16                            | 7.18        | 4.78         | 2.70         |
| WANO14G9M_at  | 1.4   | 1.4  | 3.7   | 4.0   | 2.1   | SA2365 | SA2338 | SAR2631 | SAS2437 | SAV2551 | MW2472 | feoA      | FerA domain protein                                           | Transport and binding proteins | Cations and iron carrying compounds        | 1.01                            | 2.59        | 2.81         | 1.47         |
| WANO14FRG_at  | 10.3  | 22.0 | 98.6  | 86.0  | 83.1  | SA2242 | SA2050 | SAR2338 | SAS2144 | SAV2253 | MW2172 |           | xanthine/uracil permease family protein                       | Transport and binding proteins | Nucleosides, purines and pyrimidines       | 2.13                            | 9.56        | 8.33         | 8.05         |
| WANO14I04_at  | 1.0   | 1.0  | 7.6   | 3.9   | 2.2   | SA1211 | SA1042 | SAR1175 | SAS1133 | SAV1199 | MW1082 | pyrP      | uracil permease                                               | Transport and binding proteins | Nucleosides, purines and pyrimidines       | 7.50                            | 3.80        | 2.19         |              |
| WANO14HPD_at  | 2.1   | 3.5  | 15.7  | 13.3  | 12.6  | SA1924 | SA1683 | SAR1956 | SAS1788 | SAV1966 | MW1806 | msbA      | toxin exporting ABC transporter, ATP-binding/permease protein | Transport and binding proteins | Other                                      | 1.62                            | 7.35        | 6.23         | 5.89         |
| WANO14HAM_at  | 4.5   | 1.7  | 17.8  | 11.3  | 5.3   | SA0098 | SA0099 | SAR0109 | SAS0080 | SAV0103 | MW0079 |           | drug transporter, putative                                    | Transport and binding proteins | Other                                      | -2.61                           | 3.99        | 2.54         | 1.18         |
| WANO14G71_at  | 2.2   | 2.4  | 6.8   | 4.5   | 4.4   | SA2257 | SA2061 | SAR2350 | SAS2156 | SAV2266 | MW2184 |           | drug transporter                                              | Transport and binding proteins | Other                                      | 1.07                            | 3.06        | 2.02         | 1.97         |
| WANO14FZG_at  | 1.3   | 1.9  | 3.7   | 3.3   | 2.6   | SA1823 | SA1592 | SAR1844 | SAS1685 | SAV1761 | MW1702 | ansB      | arsenical pump membrane protein                               | Transport and binding proteins | Other                                      | 1.51                            | 2.86        | 2.57         | 2.01         |
| WANO14H4_at   | 4.3   | 4.4  | 11.3  | 10.2  | 11.2  | SA1809 | SA1580 | SAR1844 | SAS1685 | SAV1761 | MW1702 |           | drug transporter, putative                                    | Transport and binding proteins | Other                                      | 1.02                            | 2.65        | 2.36         | 2.63         |
| WANO14HUO_at  | 2.1   | 1.4  | 4.9   | 4.3   | 4.6   | SA0261 | SA0263 | SAR0271 | SAS0250 | SAV0274 | MW0250 |           | drug transporter, putative                                    | Transport and binding proteins | Other                                      | -1.47                           | 2.30        | 2.01         | 2.17         |
| WANO14FVY_at  | 2.5   | 9.9  | 16.9  | 14.9  | 16.6  | SA1427 | SA1224 | SAR1404 | SAS1333 | SAV1392 | MW1280 |           | ABC transporter, ATP-binding protein                          | Transport and binding proteins | Unknown substrate                          | -3.88                           | 6.63        | 5.86         | 6.51         |
| WANO14FYI_at  | 2.9   | 1.9  | 15.9  | 13.7  | 13.5  | SA2403 | SA2194 | SAR2496 | SAS2297 | SAV2406 | MW2328 | znuA      | ABC transporter, substrate-binding protein                    | Transport and binding proteins | Unknown substrate                          | -1.27                           | 6.60        | 5.67         | 5.59         |
| WANO14HET_at  | 2.3   | 3.5  | 14.1  | 12.4  | 10.1  | SA1612 | SA1384 | SAR1632 | SAS1493 | SAV1555 | MW1507 | znuB      | ABC transporter family protein                                | Transport and binding proteins | Unknown substrate                          | 1.55                            | 6.16        | 5.43         | 4.41         |
| WANO14G9U_at  | 3.9   | 12.6 | 14.2  | 11.4  | 7.9   | SA2375 | SA2166 | SAR2465 | SAS2268 | SAV2376 | MW2298 |           | transporter                                                   | Transport and binding proteins | Unknown substrate                          | 3.21                            | 3.63        | 2.90         | 2.01         |
| WANO14H6V_at  | 1.3   | 1.3  | 3.9   | 3.6   | 2.8   | SA1613 | SA1385 | SAR1633 | SAS1494 | SAV1556 | MW1508 | znuC      | ABC transporter, ATP-binding protein                          | Transport and binding proteins | Unknown substrate                          | 1.02                            | 3.04        | 2.82         | 2.20         |
| WANO14HTF_at  | 8.3   | 14.6 | 22.0  | 21.2  | 17.6  | SA0695 | SA0594 | SAR0648 | SAS0604 | SAV0638 | MW0600 | tagG      | ABC-2 type transporter                                        | Transport and binding proteins | Unknown substrate                          | 1.77                            | 2.66        | 2.57         | 2.14         |
| WANO14QVJ_at  | 0.9   | 3.7  | 2.5   | 2.4   | 2.0   | SA0905 | SA0421 | SAR0462 | SAS0420 | SAV0463 | MW0417 | metI      | ABC transporter, permease protein                             | Transport and binding proteins | Unknown substrate                          | 3.94                            | 2.65        | 2.51         | 2.07         |
| WANO14G1V_at  | 6.4   | 9.9  | 16.6  | 17.4  | 16.3  | SA2471 | SA2250 | SAR2549 | SAS2353 | SAV2462 | MW2386 |           | transporter, putative                                         | Transport and binding proteins | Unknown substrate                          | 1.54                            | 2.59        | 2.72         | 2.54         |
| WANO14QV3_at  | 9.5   | 18.2 | 83.9  | 67.1  | 42.8  |        |        | SAR2149 |         | SAV0465 |        |           | autolysin (N-acetylmuramoyl-L-alanine amidase)                | Unclassified                   | Role category not yet assigned             | 1.93                            | 8.86        | 7.08         | 4.52         |
| WANO14H1J_at  | 0.6   | 0.5  | 3.6   | 4.6   | 4.9   |        |        |         |         |         |        |           | putative exported protein                                     | Unclassified                   | Role category not yet assigned             | 4.9                             | -1.11       | 6.01         | 7.83         |
| WANO14G94_at  | 2.1   | 1.1  | 11.1  | 8.3   | 9.2   | SA2620 | SA2397 | SAR2682 | SAS2489 | SAV2604 | MW2523 | gabT      | aminotransferase, class-III                                   | Unknown function               | Enzymes of unknown specificity             | -2.28                           | 4.58        | 3.42         | 3.79         |
| WANO14G7J_at  | 7.0   | 21.4 | 21.8  | 16.6  | 15.8  | SA2582 | SA2354 | SAR2649 | SAS2453 | SAV2567 | MW2488 |           | acetyltransferase                                             | Unknown function               | Enzymes of unknown specificity             | 3.07                            | 3.13        | 2.39         | 2.26         |
| WANO14G28_at  | 2.0   | 3.1  | 6.1   | 6.4   | 5.9   | SA1954 | SA1710 | SAR1985 | SAS1816 | SAV1994 | MW1835 |           | exonuclease                                                   | Unknown function               | Enzymes of unknown specificity             | 1.51                            | 3.02        | 3.17         | 2.92         |
| WANO14G0I_at  | 5.2   | 4.6  | 13.9  | 11.6  | 9.2   | SA0770 | SA0865 | SAR0763 | SAS0875 | SAV0710 | MW0872 |           | radical activating enzyme family protein                      | Unknown function               | Enzymes of unknown specificity             | -1.12                           | 2.68        | 2.23         | 1.98         |
| WANO14H1Y_at  | 2.5   | 4.8  | 6.3   | 4.9   | 5.6   | SA1520 | SA1311 | SAR1488 | SAS1420 | SAV1480 | MW1368 |           | pyridine nucleotide-disulfide oxidoreductase                  | Unknown function               | Enzymes of unknown specificity             | 1.94                            | 2.55        | 1.99         | 2.25         |
| WANO14HFA_at  | 0.6   | 0.7  | 1.5   | 1.5   | 1.2   | SA1765 | SA1538 | SAR1693 | SAS1560 | SAV1614 | MW1564 |           | aminotransferase, class V                                     | Unknown function               | Enzymes of unknown specificity             | 1.18                            | 2.54        | 2.39         | 2.00         |
| WANO14HPY_at  | 1.9   | 1.7  | 4.2   | 4.1   | 2.9   | SA1689 | SA1442 | SAR1689 | SAS1560 | SAV1614 | MW1564 |           | O-methyltransferase family protein                            | Unknown function               | General                                    | -1.07                           | 2.27        | 2.19         | 1.55         |
| WANO14FR3_at  | 6.0   | 20.1 | 83.9  | 75.8  | 58.1  | SA0007 | SA0007 | SAR0007 | SAS0007 | SAV0007 | MW0007 |           | YjeF-related protein, C-terminus                              | Unknown function               | General                                    | 3.34                            | 13.07       | 12.61        | 9.68         |
| WANO14G0C_at  | 1.4   | 2.7  | 7.2   | 7.3   | 5.9   | SA0772 | SA0667 | SAR0765 | SAS0677 | SAV0712 | MW0674 | exsB      | exsB protein                                                  | Unknown function               | General                                    | 1.99                            | 5.23        | 5.28         | 4.27         |
| WANO14HKL_at  | 4.0   | 4.1  | 15.9  | 12.4  | 8.2   | SA0947 | SA0805 | SAR0906 | SAS0814 | SAV0944 | MW0826 | uxuB      | comA operon protein 2                                         | Unknown function               | General                                    | 1.00                            | 3.95        | 3.07         | 2.03         |
| WANO14HBM_at  | 5.0   | 8.2  | 11.7  | 12.6  | 12.5  | SA1698 | SA1459 | SAR1723 | SAS1579 | SAV1643 | MW1593 | ptsB      | ACT domain protein                                            | Unknown function               | General                                    | 1.25                            | 2.37        | 2.54         | 2.53         |
| WANO14HWS_at  | 2.3   | 4.9  | 5.3   | 3.6   | 3.6   | SA2053 | SA1868 | SAR2151 | SAS1968 | SAV2063 | MW1887 |           | S1 RNA binding domain protein                                 | Unknown function               | General                                    | 2.12                            | 2.31        | 1.55         | 1.58         |
| WANO14I0J_at  | 4.8   | 6.9  | 10.2  | 8.1   | 6.1   | SA2108 | SA1918 | SAR2204 | SAS2019 | SAV2116 | MW2040 |           | Sua5/YcoI/YrdC/YwlC family protein                            | Unknown function               | General                                    | 1.45                            | 2.14        | 1.70         | 1.28         |
