# Supplementary material for: Changes in the Staphylococcus aureus Transcriptome during Early Adaptation to the Lung
Source: PubMed Central journal article supplement (PMC3410880; doi:10.1371/journal.pone.0041329), 2012-08-02
Supplement: pone.0041329.s008.pdf [file pone.0041329.s008.pdf]

| Systematic     | Stat. | Loc  | 30'  | 120' | 360' | COL    | N315   | MRS0A   | MSSA    | Mu50    | MW2    | GENE NAME                                                       | Protein Function                | TIGR Main Role                  | TIGR Sub Role | Fold change vs stationary phase |             |              |              |
|----------------|-------|------|------|------|------|--------|--------|---------|---------|---------|--------|-----------------------------------------------------------------|---------------------------------|---------------------------------|---------------|---------------------------------|-------------|--------------|--------------|
|                |       |      |      |      |      |        |        |         |         |         |        |                                                                 |                                 |                                 |               | LB                              | 30' in vivo | 120' in vivo | 360' in vivo |
| WANO14HML_at   | 2.9   | 0.9  | 0.7  | 0.9  | 0.9  | SA1881 | SA1638 | SAS1749 | SAS1820 | MW1768  | lukS   | synergohemolytic toxin lukS                                     | Cellular processes              | Toxin production and resistance | -3.45         | -4.19                           | -3.39       | -3.39        |              |
| WANO14P8_x_at  | 3.3   | 1.4  | 1.0  | 1.2  | 2.8  | SA1751 |        |         |         |         | mmpW_2 | truncated cell surface protein mmp-w                            | Cellular processes              | Toxin production and resistance | -2.45         | -3.29                           | -2.82       | -1.19        |              |
| WANO14HLQ_at   | 3.3   | 0.9  | 1.1  | 0.5  | 0.8  | SA1871 | SA1634 |         |         |         | epiG   | epidemic immunity protein F                                     | Cellular processes              | Toxin production and resistance | 1.52          | 0.85                            | -3.08       | -6.79        |              |
| WANO14L19_at   | 1.7   | 1.2  | 0.6  | 0.9  | 1.0  | SA2317 |        | SAS1739 | SAV2529 | MW1758  | epiG   | N-acetyltransferase                                             | Cellular processes              | Toxin production and resistance | -1.41         | -2.77                           | -1.95       | -1.68        |              |
| WANO14G2X_at   | 6.5   | 8.1  | 2.5  | 2.4  | 1.6  | SA1988 | SA1739 | SAR2017 | SAS1849 | SAV1925 | MW1866 | acyl-coenzyme A-6-aminopenicillanic acid acyl-transferase       | Cellular processes              | Toxin production and resistance | 1.23          | -2.63                           | -2.72       | -4.02        |              |
| WANO14Z2D_at   | 13.3  | 15.8 | 5.2  | 4.0  | 4.3  | SA2151 | SA1865 | SAR2252 | SAS2063 | SAV2161 | MW2088 | femD protein, phosphoglycosaminic mutase                        | Cellular processes              | Toxin production and resistance | 1.19          | -2.54                           | -3.35       | -3.06        |              |
| WANO14G3V_at   | 18.2  | 13.0 | 7.2  | 6.7  | 6.8  | SA0612 | SA0523 | SAR0569 | SAS0503 | SAV0505 | MW0520 | glycosyl transferase, group 1                                   | Cellular processes              | Toxin production and resistance | 1.40          | -2.53                           | -2.72       | -2.63        |              |
| WANO14H3O_at   | 2.4   | 2.8  | 1.0  | 0.9  | 1.0  | SA0611 | SA0522 | SAR0568 | SAS0522 | SAV0564 | MW0519 | glycosyl transferase, group 1                                   | Cellular processes              | Toxin production and resistance | 1.16          | -2.50                           | -2.65       |              |              |
| WANO14A82-see2 | 12.6  | 12.0 | 5.4  | 5.2  | 8.6  | SA0164 | SA0173 | SAR0180 | SA0154  | SAV0179 | MW0153 | gramicidin S synthetase 2                                       | Cellular processes              | Toxin production and resistance | -1.05         | -2.33                           | -2.44       | -1.47        |              |
| WANO14G8T_at   | 8.7   | 5.3  | 4.0  | 4.6  | 7.5  | SA2059 | SA2400 | SAR2726 | SAS2533 | SAV2647 | MW2568 | conserved hypothetical protein                                  | Cellular processes              | Toxin production and resistance | -1.53         | -2.18                           | -3.31       | -3.07        |              |
| WANO14GVE_at   | 3.4   | 3.6  | 1.6  | 1.3  | 1.3  | SA1184 | SA1016 | SAR1147 | SAS1106 | SAV1173 | MW1054 | exfoliatin toxin A                                              | Cellular processes              | Toxin production and resistance | 1.06          | -2.13                           | -2.58       | -2.68        |              |
| WANO14IUC_at   | 1.6   | 1.4  | 0.7  | 0.6  | 1.6  | SA2004 | SA1812 | SAR2242 | SAS2055 | SAV2154 | MW2280 | lukF leukocidin precursor, F subunit, putative                  | Cellular processes              | Toxin production and resistance | -1.11         | -2.13                           | -2.44       | 1.02         |              |
| WANO14I2A_at   | 30.7  | 15.9 | 4.1  | 3.6  | 5.0  | SA2445 | SA1999 | SAR2242 | SAS2055 | SAV2154 | MW2280 | glucosamine-fructose-6-phosphate aminotransferase (isomerizing) | Central intermediary metabolism | Amino sugars                    | -1.93         | -7.57                           | -8.58       | -6.12        |              |
| WANO14H4F_at   | 57.4  | 6.8  | 14.6 | 10.2 | 10.1 | SA1812 | SA1871 | SAR1945 | SAS1777 | SAV1854 | MW1795 | glucosamine-6-phosphate isomerase, putative                     | Central intermediary metabolism | Amino sugars                    | -6.48         | -3.93                           | -5.64       | -3.69        |              |
| WANO14G81_at   | 19.1  | 14.0 | 1.8  | 1.9  | 2.3  | SA2296 | SA2098 | SAR2389 | SAS2196 | SAV2305 | MW2224 | D-isomer specific 2-hydroxyacid dehydrogenase family protein    | Central intermediary metabolism | Other                           | -1.37         | -10.34                          | -9.81       | -8.34        |              |
| WANO14G76_at   | 22.8  | 1.6  | 3.2  | 1.7  | 4.6  | SA2276 | SA2348 | SAR2642 | SAS2447 | SAV2561 | MW2482 | dehydroisoleucine desaturase                                    | Central intermediary metabolism | Other                           | -13.99        | -7.08                           | -13.58      | -4.98        |              |
| WANO14G79_at   | 7.3   | 1.9  | 1.3  | 1.0  | 2.3  | SA2577 | SA2349 | SAR2248 | SAS2562 | MW2483  | crfM   | dehydroisoleucine synthase                                      | Central intermediary metabolism | Other                           | -1.53         | -2.74                           | -1.55       | -3.25        |              |
| WANO14I0W_at   | 150.0 | 9.0  | 35.2 | 17.9 | 17.9 | SA2114 | SA1924 | SAR2210 | SAS2025 | SAV2122 | MW2046 | glycyl betaine aldehyde dehydrogenase                           | Central intermediary metabolism | Other                           | -16.59        | -4.26                           | -8.37       | -8.37        |              |
| WANO14HJL_at   | 12.8  | 14.4 | 4.2  | 4.0  | 4.1  | SA0932 | SA0791 | SAR0892 | SAS0800 | SAV0930 | MW0812 | D-isomer specific 2-hydroxyacid dehydrogenase family protein    | Central intermediary metabolism | Other                           | 1.13          | -3.02                           | -3.17       | -3.09        |              |
| WANO14G74_at   | 10.3  | 5.4  | 3.5  | 2.7  | 3.0  | SA2574 | SA2346 | SAR2640 | SAS2445 | SAV2559 | MW2482 | D-isomer specific 2-hydroxyacid dehydrogenase family protein    | Central intermediary metabolism | Other                           | -1.91         | -2.95                           | -3.83       | -3.46        |              |
| WANO14H9J_at   | 6.5   | 4.4  | 2.8  | 2.6  | 2.1  | SA1843 | SA1814 | SAR1147 | SAS1106 | SAV1173 | MW1054 |                                                                 |                                 |                                 |               |                                 |             |              |              |

| Systematic    | Stat. | Loc   | 30'  | 120' | 360'   | COL    | N315    | MRSAs   | MSSA    | Mu50    | MW2    | GENE NAME                                  | Protein Function                                                                    | TIGR Main Role                         | TIGR Sub Role | Fold change vs stationary phase |             |              |              |
|---------------|-------|-------|------|------|--------|--------|---------|---------|---------|---------|--------|--------------------------------------------|-------------------------------------------------------------------------------------|----------------------------------------|---------------|---------------------------------|-------------|--------------|--------------|
|               |       |       |      |      |        |        |         |         |         |         |        |                                            |                                                                                     |                                        |               | LB                              | 30' in vivo | 120' in vivo | 360' in vivo |
| WANO14H86_at  | 5.2   | 6.3   | 1.0  | 0.9  | 1.4    | SA0708 | SA0606  | SAR0661 | SA0616  | SAV0651 | MW0613 | dhaL                                       | dihydroxyacetone kinase, L subunit                                                  | Energy metabolism                      | Other         | 1.23                            | -6.39       | -5.58        | -3.65        |
| WANO14H84_at  | 6.4   | 8.4   | 1.2  | 1.4  | 2.2    | SA0707 | SA0605  | SAR0660 | SA0615  | SAV0650 | MW0612 | dhaK                                       | dihydroxyacetone kinase family protein                                              | Energy metabolism                      | Other         | 1.30                            | -8.21       | -4.69        | -2.89        |
| WANO14G99_at  | 77.8  | 34.6  | 16.1 | 11.9 | 13.3   | SA2624 | SA0246  | SAR2687 | SA2494  | SAV2609 | MW2528 | acp                                        | acyl-CoA synthetase, putative                                                       | Energy metabolism                      | Other         | -2.25                           | -4.82       | -6.52        | -5.84        |
| WANO14IUF_at  | 61.4  | 57.9  | 14.2 | 10.6 | 15.1   | SA0123 | SA0133  |         |         |         |        | deoC                                       | deoxyribose-phosphate aldolase                                                      | Energy metabolism                      | Other         | -1.06                           | -4.31       | -5.81        | -4.07        |
| WANO14HE_e    | 44.1  | 33.2  | 16.7 | 13.3 | 16.4   | SA0973 | SA0829  | SAR0930 | SA0838  | SAV0968 | MW0850 |                                            | fumaroylacetate hydrolase family protein                                            | Energy metabolism                      | Other         | -1.33                           | -2.65       | -3.31        | -2.69        |
| WANO14H62_at  | 8.7   | 9.1   | 3.8  | 6.4  | 7.5    | SA1130 | SA1141  | SAR1275 | SAS1233 | SAV1301 | MW1183 | gpiK                                       | glycerol kinase                                                                     | Energy metabolism                      | Other         | -1.05                           | -6.06       | -4.42        | -4.18        |
| WANO14FVQ_at  | 6.9   | 13.7  | 3.0  | 2.8  | 2.3    | SA2929 | SA2127  | SAR2422 | SA0228  | SAV2536 | MW2256 | rpiA                                       | ribose 5-phosphate isomerase                                                        | Energy metabolism                      | Other         | -2.96                           | -2.30       | -2.46        | -3.03        |
| WANO14F_XJ_at | 56.7  | 58.2  | 28.3 | 29.3 | 26.7   | SA1549 | SA1336  | SAR1582 | SAS1445 | SAV1505 | MW1459 | zwf                                        | glucose-6-phosphate 1-dehydrogenase                                                 | Energy metabolism                      | Other         | 1.03                            | -2.01       | -1.94        | -2.12        |
| WANO14H33_at  | 5.7   | 9.3   | 1.1  | 1.3  | 1.4    | SA0958 | SA0510  | SAR0557 | SA0510  | SAV0552 | MW0507 | araB                                       | L-tubulin kinase                                                                    | Energy metabolism                      | Sugars        | 1.64                            | -6.06       | -4.42        | -4.18        |
| WANO14H32_at  | 7.2   | 1.1   | 0.7  | 1.7  | SA2149 | SA1963 | SAR2247 | SA0200  | SAV2159 | MW2026  | mid    | mannitol 1-phosphate 5-dehydrogenase       | Energy metabolism                                                                   | Sugars                                 | -2.92         | -5.32                           | -5.52       | -2.56        |              |
| WANO14H3R_at  | 25.5  | 8.6   | 6.8  | 4.9  | 6.5    | SA0617 | SA0528  | SAR0574 | SA0528  | SAV0570 | MW0525 | hxaA                                       | hexulose-6-phosphate synthase, putative                                             | Energy metabolism                      | Sugars        | -2.97                           | -3.72       | -5.18        | -3.89        |
| WANO14GCG_at  | 5.9   | 12.2  | 2.0  | 2.0  | 1.9    | SA2001 | SA2279  | SAR2576 | SAS2378 | SAV2491 | MW2411 | manB                                       | phosphoglucomutase/phosphomannomutase family protein                                | Energy metabolism                      | Sugars        | 2.08                            | -2.95       | -2.98        | -3.18        |
| WANO14HVP_at  | 6.4   | 6.6   | 2.3  | 2.3  | 2.6    | SA2028 | SA1945  | SAR2127 | SAS1945 | SAV2040 | MW1964 | fkf                                        | fructokinase, putative                                                              | Energy metabolism                      | Sugars        | -1.04                           | -2.79       | -2.81        | -2.49        |
| WANO14GYC_at  | 51.4  | 27.0  | 4.2  | 4.0  | 5.6    | SA1448 | SA1244  | SAR1424 | SAS1355 | SAV1412 | MW1302 | sucB                                       | 2-oxoglutarate dehydrogenase, E2 component, dihydropyridinamide succinyltransferase | Energy metabolism                      | TCA cycle     | -4.14                           | -1.91       | -12.29       | -12.79       |
| WANO14GY_e    | 10.5  | 6.2   | 1.0  | 0.8  | 1.5    | SA2149 | odhA    | SAR1425 | SAS1356 | SAV1413 | MW1303 | sucA                                       | 2-oxoglutarate dehydrogenase, E1 component                                          | Energy metabolism                      | TCA cycle     | -1.07                           | -10.76      | -10.65       | -6.87        |
| WANO14H07_at  | 27.1  | 18.0  | 2.9  | 3.6  | 3.6    | SA1958 | SA1669  | SAR1942 | SAS1772 | SAV1851 | MW1792 | fumC                                       | fumarate hydratase, class I                                                         | Energy metabolism                      | TCA cycle     | -1.51                           | -9.48       | -7.60        | -7.60        |
| WANO14HWR_at  | 33.9  | 18.7  | 4.5  | 6.8  | 6.3    | SA1158 | SA0294  | SAR1120 | SAS1081 | SAV1147 | MW1030 | sdhC                                       | succinate dehydrogenase, cytochrome b558 subunit                                    | Energy metabolism                      | TCA cycle     | -1.21                           | -7.46       | -4.96        | -5.35        |
| WANO14HTW_at  | 120.3 | 64.3  | 17.1 | 27.3 | 33.0   | SA1109 | SA0995  | SAR1121 | SAS1082 | SAV1148 | MW1031 | sdhA                                       | succinate dehydrogenase, flavoprotein subunit                                       | Energy metabolism                      | TCA cycle     | -1.87                           | -7.04       | -4.42        | -3.64        |
| WANO14FWY_at  | 62.3  | 31.2  | 10.8 | 10.3 | 17.8   | SA2362 | SA2155  | SAR2454 | SAS2256 | SAV2365 | MW2286 | mqp                                        | malate:quinone oxidoreductase                                                       | Energy metabolism                      | TCA cycle     | -2.00                           | -5.79       | -6.06        | -3.49        |
| WANO14HWV_at  | 92.5  | 50.4  | 18.6 | 21.6 | 28.5   | SA1160 | SA0996  | SAR1122 | SAS1083 | SAV1149 | MW1032 | sdhB                                       | succinate dehydrogenase, iron-sulfur protein                                        | Energy metabolism                      | TCA cycle     | -1.83                           | -4.97       | -4.28        | -3.25        |
| WANO14IYQ_at  | 7.7   | 5.1   | 1.8  | 1.3  | 2.2    | SA1245 | SA1125  | SAR1425 | SAS1356 | SAV1413 | MW1303 | sucA                                       | 2-oxoglutarate dehydrogenase, E1 component                                          | Energy metabolism                      | TCA cycle     | -1.52                           | -4.75       | -5.99        | -3.55        |
| WANO14I2Q_at  | 67.6  | 71.0  | 16.3 | 15.2 | 31.9   | SA1262 | SA1088  | SAR1221 | SAS1179 | SAV1245 | MW1128 | sucC                                       | succinyl-CoA synthase, beta subunit                                                 | Energy metabolism                      | TCA cycle     | 1.05                            | -4.15       | -4.46        | -2.12        |
| WANO14HE7_at  | 19.5  | 8.5   | 5.0  | 6.9  | 12.3   | SA1742 | SA1518  | SAR1774 | SAS1823 | SAV1695 | MW1639 | glia                                       | citrate synthase                                                                    | Energy metabolism                      | TCA cycle     | -2.28                           | -3.90       | -2.83        | -1.58        |
| WANO14HE5_at  | 52.1  | 18.2  | 14.6 | 19.5 | 40.0   | SA1741 | SA1517  | SAR1773 | SAS1822 | SAV1694 | MW1638 | glk                                        | isocitrate dehydrogenase, NADP-dependent                                            | Energy metabolism                      | TCA cycle     | -1.81                           | -2.87       | -3.62        | -3.30        |
| WANO14FUH_at  | 68.6  | 51.3  | 19.5 | 24.9 | 54.0   | SA1385 | SA1184  | SAR1362 | SAS1289 | SAV1350 | MW1237 | acon                                       | aconitate hydratase                                                                 | Energy metabolism                      | TCA cycle     | -1.34                           | -3.51       | -2.76        | -1.27        |
| WANO14I2V_at  | 142.6 | 114.4 | 60.0 | 62.1 | 118.0  | SA1263 | SA1089  | SAR1222 | SAS1180 | SAV1246 | MW1129 | sucD                                       | succinyl-CoA synthase, alpha subunit                                                | Energy metabolism                      | TCA cycle     | -1.25                           | -2.38       | -2.30        | -1.21        |
| WANO14HDO_at  | 11.0  | 1.8   | 1.2  | 1.1  | 2.5    | SA0211 | SA0223  | SAR0223 | SA0207  | SAV0231 | MW0207 | atoB                                       | acetyl-CoA acetyltransferase                                                        | Fatty acid and phospholipid metabolism | Biosynthesis  | -6.12                           | -8.05       | -8.96        | -4.45        |
| WANO14HTL_at  | 7.1   | 3.1   | 2.9  | 3.5  | 1.9    | SA2098 | SA1968  | SAR2098 | SA0224  | SAV0232 | MW0208 | fabG                                       | 3-hydroxyacyl-CoA dehydrogenase family protein                                      | Fatty acid and phospholipid metabolism | Biosynthesis  | -1.45                           | -3.10       | -2.92        | -3.29        |
| WANO14G2P_at  | 4.3   | 1.4   | 2.0  | 1.5  | 1.5    | SA2822 | SA2260  | SAR1646 | SA1507  | SAV2472 |        | fabG                                       | 3-oxoacyl-(acyl carrier protein) reductase, authentic point mutation                | Fatty acid and phospholipid metabolism | Biosynthesis  | -3.00                           | -2.20       | -2.79        | -2.78        |
| WANO14GCV_at  | 128.3 | 18.0  | 2.1  | 2.3  | 4.5    | SA2694 | SA2463  | SAR2753 | SA2256  | SAV2671 | MW2590 | lip                                        | lipase                                                                              | Fatty acid and phospholipid metabolism | Degradation   | -7.13                           | -61.82      | -56.88       | -28.36       |
| WANO14HEU_at  | 8.9   | 0.4   | 0.3  | 2.0  | SA0213 | SA0225 | SAR0225 | SA0209  | SAV0233 | MW0209  | fadD   | acyl-CoA dehydrogenase family protein      | Fatty acid and phospholipid metabolism                                              | Degradation                            | -1.45         | -2.82                           | -2.67       | -1.30        |              |
| WANO14H5U_at  | 2.1   | 1.4   | 0.9  | 2.2  | 2.7    | SA1034 | SA0226  | SAR0226 | SA0208  | SAV0232 | MW0208 | fabB                                       | 3-hydroxyacyl-CoA dehydrogenase family protein                                      | Fatty acid and phospholipid metabolism | Degradation   | -2.00                           | -3.28       | -3.01        | -5.00        |
| WANO14HFF_at  | 4.2   | 0.9   | 0.7  | 1.5  | SA0214 | SA0226 | SAR0226 | SA0210  | SAV0234 | MW0210  | fadE   | long-chain-fatty-acyl-CoA ligase, putative | Fatty acid and phospholipid metabolism                                              | Degradation                            | -4.00         | -4.74                           | -5.64       | -2.89        |              |
| WANO14G5V_at  | 29.5  | 24.0  | 8.4  | 7.3  | 0.9    | SA2549 | SA2323  | SAR2615 | SA2421  | SAV2535 | MW2456 |                                            | esterase, putative                                                                  | Fatty acid and phospholipid metabolism | Degradation   | -1.22                           | -3.50       | -4.01        | -2.97        |
| WANO14H5E_at  | 9.0   | 27.0  | 9.8  | 2.2  | 2.7    | SA1034 | SA0226  | SAR0226 | SA0210  | SAV0234 | MW0210 | pic                                        | 1-phosphatidylcholine phosphodiesterase precursor                                   | Fatty acid and phospholipid metabolism | Degradation   | -1.21                           | -1.10       | -2.52        | -2.40        |
| WANO14FWC_at  | 12.4  | 19.0  | 4.2  | 4.9  | 3.9    | SA2345 | SA2140  | SAR2435 | SAS2241 | SAV2350 | MW2271 |                                            | esterase, putative                                                                  | Fatty acid and phospholipid metabolism | Degradation   | 1.54                            | -2.93       | -2.54        | -3.14        |
| WANO14HR1_at  | 65.7  | 47.7  | 27.1 | 23.3 | 32.3   | SA1058 | SA0988  | SAR1019 | SAS0981 | SAV1045 | MW1069 | menB                                       | enoyl-CoA hydratase/isomerase family protein                                        | Fatty acid and phospholipid metabolism | Degradation   | -1.38                           | -2.42       | -2.52        | -3.03        |
| WANO14HIP_at  | 29.7  | 15.3  | 14.9 | 12.4 | 10.6   | SA1814 | SA1584  | SAR1848 | SAS1889 | SAV1765 | MW1708 |                                            | lyso-phospholipase, putative                                                        | Fatty acid and phospholipid metabolism | Other         | -1.94                           | -1.99       | -2.40        | -2.81        |
| WANO14FWG_at  | 9.0   | 2.7   | 2.4  | 2.2  | 2.7    | SA1034 | SA0226  | SAR0226 | SA0210  | SAV0234 | MW0210 | pic                                        | 1-phosphatidylcholine phosphodiesterase precursor                                   | Fatty acid and phospholipid metabolism | Other         | 2.14                            | -1.46       | -3.14        | -2.81        |
| WANO14H41_at  | 2.1   | 1.4   | 0.9  | 1.1  | 1.0    | SA0621 | SA0533  | SAR0580 | SA0533  | SAV0575 | MW0530 | vrA                                        | substrate-CoA ligase, putative                                                      | Fatty acid and phospholipid metabolism | Degradation   | -1.46                           | -2.27       | -1.86        | -2.03        |
| WANO14GSN_at  | 18.4  | 4.4   | 0.6  | 0.4  | 1.3    | SA0176 | SA0184  | SAR0191 | SA0316  | SAV0190 | MW0164 |                                            | conserved hypothetical protein                                                      | Hypothetical proteins                  | Conserved     | -4.23                           | -33.30      | -48.05       | -13.90       |
| WANO14G5E_at  | 45.4  | 16.4  | 1.8  | 5.2  | 6.3    | SA0274 | SA0274  | SAR0274 | SA0209  | SAV0233 | MW0209 |                                            | conserved hypothetical protein                                                      | Hypothetical proteins                  | Conserved     | -1.8                            | -1.17       | -1.16        | -7.24        |
| WANO14GNW_at  | 27.2  | 5.1   | 1.3  | 2.6  | 5.7    | SA0768 | SA0663  | SAR0761 | SA0673  | SAV0708 | MW0607 | saeP                                       | hypothetical protein                                                                | Hypothetical proteins                  | Conserved     | -5.30                           | -20.43      | -10.54       | -4.74        |
| WANO14GNU_at  | 46.0  | 9.3   | 3.2  | 6.5  | 11.3   | SA0767 | SA0662  | SAR0760 | SA0672  |         |        | saeO                                       | conserved hypothetical protein                                                      | Hypothetical proteins                  | Conserved     | -4.92                           | -14.45      | -7.07        | -4.08        |
| WANO14H35_at  | 31.5  | 24.4  | 3.2  | 4.2  | 6.2    | SA0599 | SA0511  | SAR0558 | SA0511  | SAV0553 | MW0508 | wcaG                                       | conserved hypothetical protein                                                      | Hypothetical proteins                  | Conserved     | -1.29                           | -8.84       | -7.52        | -5.08        |
| WANO14G92_at  | 25.7  | 16.1  | 3.1  | 3.6  | 6.1    | SA1846 | SA1617  | SAR1846 | SA1617  |         |        | RNA                                        | hypothetical protein                                                                | Hypothetical proteins                  | Conserved     | -1.1                            | -1.61       | -1.16        | -4.58        |
| WANO14H1I_at  | 91.3  | 75.3  | 11.5 | 10.5 | 13.1   | SA2127 | SA1937  | SAR2223 | SA2038  | SAV2135 | MW2059 |                                            | conserved hypothetical protein                                                      | Hypothetical proteins                  | Conserved     | -1.21                           | -7.93       | -6.87        | -6.98        |
| WANO14G8L_at  | 12.6  | 1.1   | 1.6  | 1.3  | 1.4    | SA2605 | SA2374  | SAR2668 | SA2474  | SAV2588 | MW2508 |                                            | conserved hypothetical protein                                                      | Hypothetical proteins                  | Conserved     | -11.06                          | -7.84       | -9.74        | -8.94        |
| WANO14G8L_e   | 6.5   | 1.4   | 0.9  | 1.1  | 1.7    | SA2605 | SA2374  | SAR2668 | SA2474  | SAV2588 | MW2508 |                                            | conserved hypothetical protein                                                      | Hypothetical proteins                  | Conserved     | -3.90                           | -2.29       | -3.12        | -3.28        |
| WANO14GKV_at  | 78.4  | 10.2  | 13.4 | 10.0 | 11.1   | SA1226 | SA1057  | SAR1190 | SAS1148 | SAV1214 | MW1097 |                                            | conserved hypothetical protein                                                      | Hypothetical proteins                  | Conserved     | -11.67                          | -5.84       | -7.87        | -7.04        |
| WANO14G7F_at  | 11.3  | 10.3  | 2.0  | 0.9  | 1.1    | SA2580 | SA2352  | SAR2647 | SA2451  | SAV2565 | MW2486 | criO                                       | staphyloanthine biosynthesis (ORF 3)                                                | Hypothetical proteins                  | Conserved     | -6.75                           | -12.34      | -10.54       | -10.54       |
| WANO14H1X_at  | 20.4  | 3.7   | 2.1  | 2.6  | SA2136 | SA1946 | SAR2232 | SA2047  | SAV2144 | MW2068  |        |                                            | conserved hypothetical protein                                                      | Hypothetical proteins                  | Conserved     | -5.51                           | -8.96       | -7.93        | -7.93        |
| WANO14GDR_at  | 49.1  | 10.1  | 1.2  | 1.2  | SA0274 | SA0274 | SAR0274 | SA0209  | SAV0233 | MW0209  |        |                                            | conserved hypothetical protein                                                      | Hypothetical proteins                  | Conserved     | -2.05                           | -3.00       | -3.29        | -3.29        |
| WANO14G99_e   | 29.6  | 1.0   | 5.6  | 3.3  | 4.2    | SA2625 | SA2403  | SAR2688 | SAS2495 | SAV2610 | MW2529 |                                            | conserved hypothetical protein                                                      | Hypothetical proteins                  | Conserved     | -29.58                          | -5.30       | -8.88        | -7.00        |
| WANO14H1P_at  | 4.9   | 5.5   | 1.0  | 0.9  | 0.7    | SA2132 | SA1924  | SAR2228 | SAS2043 | SAV2140 | MW2074 |                                            | conserved hypothetical protein                                                      | Hypothetical proteins                  | Conserved     | -1.12                           | -5.12       | -5.26        | -7.21        |
| WANO14H1H_at  | 17.4  | 14.2  | 3.5  | 3.9  | 5.8    | SA0568 | SA0481  | SAR0526 | SAS0480 | SAV0523 | MW0548 |                                            | conserved hypothetical protein                                                      | Hypothetical proteins                  | Conserved     | -1.23                           | -5.02       | -4.50        | -3.02        |
| WANO14H1Q_at  | 19.8  | 9.9   | 4.5  | 2.7  | 4.5    | SA2461 | SA2442  | SAR2461 | SA2453  | SAV2453 | MW2453 |                                            | conserved hypothetical protein                                                      |                                        |               |                                 |             |              |              |

|                |        |        |        |        |        |        |         |         |         |         |        | Fold change vs stationary phase |                                |                |               |               |                                       |        |        |        |
|----------------|--------|--------|--------|--------|--------|--------|---------|---------|---------|---------|--------|---------------------------------|--------------------------------|----------------|---------------|---------------|---------------------------------------|--------|--------|--------|
| Systematic     | Stat.  | Loc    | 30'    | 120'   | 360'   | COL    | N315    | MRSa    | MSSA    | Mu50    | MW2    | GENE NAME                       | Protein Function               | TIGR Main Role | TIGR Sub Role | LB            | 30' in vivo 120' in vivo 360' in vivo |        |        |        |
|                |        |        |        |        |        |        |         |         |         |         |        |                                 |                                |                |               |               | 30'                                   | 120'   | 360'   | 120'   |
| WANO14HGE_at   | 136.3  | 20.0   | 56.8   | 34.9   | 33.2   | SA1789 | SA1560  | SAR1817 | SAS1665 | SAV1739 | MW1682 |                                 | conserved hypothetical protein |                |               | Conserved     | -6.83                                 | -2.40  | -3.91  | -4.11  |
| WANO14I2F_at   | 2.1    | 2.1    | 0.9    | 0.7    | 0.8    | SA2152 | SA1966  | SAR2253 | SAS2064 | SAV2162 | MW2089 |                                 | conserved hypothetical protein |                |               | Conserved     | 1.03                                  | -2.37  | -2.80  | -2.47  |
| WANO14GML_at   | 3.6    | 2.6    | 1.5    | 1.7    | 1.4    | SAS041 | SAR1333 | SAS1263 | MW1210  |         |        |                                 | conserved hypothetical protein |                |               | Conserved     | -1.40                                 | -2.33  | -2.17  | -2.56  |
| WANO14GNB_at   | 203.2  | 145.7  | 88.7   | 75.0   | 115.6  | SA0271 | SA0271  | SAR0279 | SAS0258 | SAV0282 | MW2529 | esxA                            | conserved hypothetical protein |                |               | Conserved     | -1.39                                 | -2.29  | -2.71  | -1.76  |
| WANO14GCE_at   | 5.2    | 1.6    | 2.3    | 1.8    | 1.4    | SA2682 | SA2452  | SAR2740 | SAS2545 | SAV2659 | MW2579 |                                 | conserved hypothetical protein |                |               | Conserved     | -3.29                                 | -2.27  | -2.95  | -3.80  |
| WANO14XM_x_at  | 4.9    | 2.8    | 2.2    | 1.8    | 2.9    |        | SA1788  |         |         |         |        |                                 | conserved hypothetical protein |                |               | Conserved     | -1.72                                 | -2.25  | -2.72  | -1.85  |
| WANO14QVP_at   | 125.4  | 10.0   | 56.4   | 42.1   | 76.5   | SA0446 | SA0360  | SAR0362 | SAS0351 | SAV0374 | MW0349 |                                 | conserved hypothetical protein |                |               | Conserved     | -12.54                                | -2.23  | -2.98  | -1.64  |
| WANO14GHV_at   | 2498.3 | 1570.8 | 1136.4 | 1326.7 | 1365.3 |        | SA0500  | SAR1709 | SAS1565 | SAV1629 | MW1579 |                                 | conserved hypothetical protein |                |               | Conserved     | -1.59                                 | -2.20  | -1.88  | -1.83  |
| WANO14FNF_at   | 5.4    | 3.1    | 2.4    | 1.9    | 1.7    | SA1440 | SA1237  | SAR1417 | SAS1346 | SAV1405 | MW1293 |                                 | conserved hypothetical protein |                |               | Conserved     | -1.72                                 | -2.20  | -2.88  | -3.11  |
| WANO14FYK_at   | 15.6   | 21.3   | 7.1    | 6.1    | 6.4    | SA1359 | SA1661  | SAR1934 | SAS1764 | SAV1943 | MW1784 |                                 | conserved hypothetical protein |                |               | Conserved     | 1.37                                  | -2.19  | -2.57  | -2.45  |
| WANO14FVX_at   | 5.2    | 3.8    | 2.4    | 2.2    | 2.2    | SA2404 | SA2195  | SAR2497 | SAS2298 | SAV2407 | MW2329 |                                 | conserved hypothetical protein |                |               | Conserved     | -1.39                                 | -2.17  | -2.37  | -2.33  |
| WANO14H01_at   | 4.6    | 6.1    | 2.1    | 1.8    | 2.3    | SA2334 | SA2131  | SAR2426 | SAS2232 | SAV2340 | MW2260 | nalB                            | conserved hypothetical protein |                |               | Conserved     | 1.32                                  | -2.17  | -2.59  | -2.03  |
| WANO14G2Z_at   | 2.3    | 2.9    | 1.1    | 1.2    | 1.4    | SA1947 | SA1705  | SAR1980 | SAS1811 | SAV1889 | MW1529 | galE                            | conserved hypothetical protein |                |               | Conserved     | 1.25                                  | -2.16  | -1.88  | -1.69  |
| WANO14H01_at   | 9.4    | 14.6   | 4.4    | 4.3    | 6.1    | SA1011 | SA0855  | SAR0374 | SAS0876 | SAV1007 | MW0658 | ppkA                            | conserved hypothetical protein |                |               | Conserved     | 1.58                                  | -2.14  | -2.17  | -2.30  |
| WANO14HWF_at   | 2.0    | 1.3    | 0.9    | 1.1    | 1.0    |        | SAR1313 |         |         |         |        |                                 | conserved hypothetical protein |                |               | Conserved     | -1.48                                 | -2.14  | -1.77  | -2.06  |
| WANO14H4A_at   | 3.1    | 1.9    | 1.4    | 1.2    | 1.8    |        | SA1796  | SAR2087 | SAS1908 | SAV1987 | MW1925 |                                 | conserved hypothetical protein |                |               | Conserved     | -1.59                                 | -2.14  | -2.47  | -1.73  |
| WANO14QYS_at   | 51.3   | 51.9   | 24.0   | 18.4   | 22.7   | SA0521 | SA0437  | SAR0478 | SAS0436 | SAV0479 | MW0434 |                                 | conserved hypothetical protein | TIGR00103      |               | Conserved     | -1.01                                 | -2.14  | -2.78  | -2.26  |
| WANO14LW_x_at  | 1.2    | 0.6    | 0.6    | 0.8    | 1.0    | SA0286 |         |         |         |         |        |                                 | conserved hypothetical protein |                |               | Conserved     | -2.05                                 | -2.13  | -1.57  | -1.24  |
| WANO14G53_at   | 3.2    | 1.3    | 1.5    | 1.4    | 1.7    | SA2529 | SA2306  |         |         |         |        |                                 | conserved hypothetical protein |                |               | Conserved     | -2.48                                 | -2.11  | -2.31  | -1.88  |
| WANO14HNR_at   | 3.7    | 5.2    | 1.8    | 1.6    | 1.4    | SA1009 | SA0863  | SAR0972 | SAS0874 | SAV1005 | MW0886 |                                 | conserved hypothetical protein |                |               | Conserved     | 1.39                                  | -2.09  | -2.34  | -2.68  |
| WANO14H4K_at   | 1.9    | 2.1    | 0.9    | 0.7    | 1.1    |        |         |         |         |         |        |                                 | conserved hypothetical protein |                |               | Conserved     | 1.12                                  | -2.08  | -2.74  | -2.74  |
| WANO14H4K_at   | 1.2    | 0.6    | 0.5    | 0.9    | SA0106 | SA0118 | SAR0125 | SAS0096 | SAV0122 | MW0095  |        |                                 | conserved hypothetical protein |                |               | Conserved     | -2.08                                 | -2.43  | -1.43  | -1.43  |
| WANO14H4J_at   | 1.5    | 1.6    | 0.7    | 0.8    | 1.2    | SA0930 | SA0789  | SAR0890 | SAS0798 | SAV0928 | MW0810 |                                 | conserved hypothetical protein |                |               | Conserved     | 1.06                                  | -2.07  | -1.80  | -1.23  |
| WANO14F7H_at   | 1.5    | 1.2    | 0.7    | 0.8    | 1.0    |        |         |         |         |         |        |                                 | conserved hypothetical protein |                |               | Conserved     | -1.28                                 | -2.07  | -2.30  | -2.52  |
| WANO14GEO_at   | 4.7    | 2.2    | 2.3    | 1.5    | 2.5    | SA2596 | SA2366  | SAR2660 | SAS2466 | SAV2580 | MW2500 |                                 | conserved hypothetical protein |                |               | Conserved     | -2.12                                 | -2.06  | -3.18  | -1.84  |
| WANO14G5X_at   | 22.1   | 35.4   | 10.7   | 9.2    | 7.8    | SA2550 | SA2324  | SAR2616 | SAS2422 | SAV2536 | MW2457 |                                 | conserved hypothetical protein |                |               | Conserved     | 1.60                                  | -2.06  | -2.41  | -2.85  |
| WANO14M3_x_at  | 1.1    | 0.9    | 0.5    | 0.3    | 0.3    | SA0296 | SA0289  |         |         |         |        |                                 | conserved hypothetical protein |                |               | Conserved     | -1.17                                 | -2.03  | -3.52  | -2.74  |
| WANO14F5J_at   | 1.2    | 1.3    | 1.3    | 1.3    | 1.5    | SA0467 | SA0381  | SAR0421 | SAS0383 | SAV0421 | MW0381 |                                 | conserved hypothetical protein |                |               | Conserved     | 0.95                                  | -2.03  | -2.31  | -2.45  |
| WANO14GGO_at   | 2.5    | 2.0    | 1.2    | 1.3    | 1.5    | SA0467 | SA0381  | SAR0421 | SAS0383 | SAV0421 | MW0381 |                                 | conserved hypothetical protein |                |               | Conserved     | -1.27                                 | -2.02  | -1.91  | -1.72  |
| WANO14GSO_at   | 7.2    | 7.0    | 3.1    | 2.8    | 2.7    | SA1006 | SA0860  | SAR0969 | SAS0871 | SAV1001 | MW0883 |                                 | conserved hypothetical protein |                |               | Conserved     | 1.12                                  | -2.00  | -2.20  | -2.28  |
| WANO14G2H_at   | 6.8    | 8.9    | 3.9    | 3.1    | 3.0    | SA1467 | SA1264  | SAR1444 | SAS1374 | SAV1431 |        |                                 | conserved hypothetical protein |                |               | Conserved     | -1.15                                 | -1.98  | -2.48  | -2.60  |
| WANO14G04_at   | 16.6   | 10.8   | 1.9    | 2.1    | 2.5    | SA1947 | SA1818  |         |         |         |        |                                 | conserved domain protein       |                |               | Domain        | -1.53                                 | -1.98  | -1.83  | -1.78  |
| WANO14GNB_at   | 19.3   | 2.8    | 4.4    | 2.5    | 2.7    | SA0742 | SA0637  | SAR0735 | SAS0647 | SAV0682 | MW0644 |                                 | conserved domain protein       |                |               | Domain        | -6.83                                 | -4.33  | -7.78  | -7.23  |
| WANO14G0J_at   | 27.6   | 2.6    | 1.2    | 1.2    | 1.3    | SA1870 | SA1738  |         |         |         | MW1757 |                                 | hypothetical protein           |                |               | Not Conserved | -10.73                                | -2.85  | -2.80  | -2.80  |
| WANO14G5G_at   | 58.6   | 3.4    | 2.8    | 1.6    | 7.0    | SA0460 | SA0395  | SAR0437 | SAS0398 |         | MW0396 |                                 | hypothetical protein           |                |               | Not Conserved | 21.22                                 | -2.71  | -16.40 | -8.34  |
| WANO14BQV_at   | 8.9    | 2.2    | 0.5    | 0.7    | 1.3    | SA2693 |         |         |         |         |        |                                 | hypothetical protein           |                |               | Not Conserved | -4.01                                 | -17.44 | -12.83 | -6.70  |
| WANO14FTI_at   | 16.0   | 10.6   | 1.9    | 1.8    | 2.8    |        |         | SA0371  |         |         | MW0372 |                                 | hypothetical protein           |                |               | Not Conserved | -1.52                                 | -8.64  | -9.02  | -5.67  |
| WANO14GDO_at   | 257.9  | 8.7    | 34.6   | 27.1   | 37.8   | SA0457 | SA0372  |         |         |         |        |                                 | hypothetical protein           |                |               | Not Conserved | -8.99                                 | -7.46  | -6.53  | -4.82  |
| WANO14HPI_at   | 9.2    | 2.0    | 1.2    | 1.6    | 2.6    | SA1133 | SA0893  | SAR0996 | SAS0969 | SAV1027 | MW0907 |                                 | hypothetical protein           |                |               | Not Conserved | 1.52                                  | -7.98  | -4.67  | -3.93  |
| WANO14GPI_at   | 5.3    | 8.7    | 0.8    | 0.9    | 1.2    | SA0851 | SA0739  | SAR0839 | SAS0749 | SAV0808 | MW0761 |                                 | hypothetical protein           |                |               | Not Conserved | 1.62                                  | -6.94  | -5.75  | -4.49  |
| WANO14G5G_at   | 57.6   | 7.6    | 8.4    | 6.7    | 0.6    | SA1046 |         | SAR1012 | SAS0974 |         | MW0922 |                                 | hypothetical protein           |                |               | Not Conserved | -7.61                                 | -6.88  | -6.57  | -5.97  |
| WANO14G2Y_at   | 41.1   | 32.1   | 7.7    | 4.9    | 4.3    | SA1992 | SA1743  | SAR2021 | SAS1853 | SAV1929 | MW1870 |                                 | hypothetical protein           |                |               | Not Conserved | -6.1                                  | -6.28  | -6.10  | -5.42  |
| WANO14FX4_at   | 63.8   | 28.1   | 10.7   | 5.7    | 5.9    | SA2365 | SA2158  |         |         |         |        |                                 | hypothetical protein           |                |               | Not Conserved | -2.27                                 | -5.95  | -11.16 | -10.84 |
| WANO14H3C_at   | 9.0    | 2.3    | 1.6    | 1.1    | 1.2    | SA0092 | SA0105  | SAR0112 | SAS0083 | SAV0109 | MW0082 |                                 | hypothetical protein           |                |               | Not Conserved | -3.99                                 | -5.63  | -8.44  | -7.47  |
| WANO14GQJ_at   | 109.7  | 4.3    | 2.0    | 2.6    | 75.4   | SA0625 | SA0516  | SAR0584 | SAS0537 | SAV0579 | MW0534 |                                 | hypothetical protein           |                |               | Not Conserved | -2.48                                 | -6.42  | -1.45  | -0.79  |
| WANO14BPR_at   | 19.7   | 7.5    | 3.7    | 3.9    | 7.2    | SA0400 |         | SAR0449 | SA03407 |         | MW0405 |                                 | hypothetical protein           |                |               | Not Conserved | 7.2                                   | -3.63  | -5.27  | -5.03  |
| WANO14GCG_at   | 11.6   | 5.4    | 2.3    | 2.0    | 2.2    | SA0456 | SA0371  | SAR0404 | SAS0382 | SAV0386 | MW0362 |                                 | hypothetical protein           |                |               | Not Conserved | -2.16                                 | -5.01  | -5.75  | -5.32  |
| WANO14I3J_at   | 60.8   | 13.3   | 12.8   | 6.6    | 7.8    | SA2174 | SA1985  | SAR2274 | SAS2084 | SAV2183 | MW2109 |                                 | hypothetical protein           |                |               | Not Conserved | -48.16                                | -4.75  | -6.17  | -7.82  |
| WANO14HGA_x_at | 14.3   | 1.8    | 3.0    | 2.0    | 2.5    | SA0176 |         |         |         |         |        |                                 | hypothetical protein           |                |               | Not Conserved | 3.1                                   | -6.99  | -7.22  | -5.71  |
| WANO14H2X_at   | 2.8    | 0.6    | 0.6    |        |        | SA0156 | SA0164  |         |         |         |        |                                 | hypothetical protein           |                |               | Not Conserved | -7.74                                 | -4.46  |        |        |
| WANO14BQV_at   | 24.2   | 8.6    | 5.7    | 6.6    | 5.8    | SA1978 |         |         |         |         |        |                                 | hypothetical protein           |                |               | Not Conserved | -2.81                                 | -4.28  | -3.69  | -4.14  |
| WANO14GPH_at   | 9.2    | 16.9   | 2.2    | 1.9    | 2.1    | SA0850 |         |         |         |         |        |                                 | hypothetical protein           |                |               | Not Conserved | 1.84                                  | -4.23  | -4.78  | -4.35  |
| WANO14G5L_at   | 7.4    | 2.9    | 1.8    | 1.6    | 2.3    | SA1138 | SA1948  | SAR2234 | SAS2049 | SAV2146 | MW2070 |                                 | hypothetical protein           |                |               | Not Conserved | 16.26                                 | -4.18  | -3.66  | -3.51  |
| WANO14H7T_at   | 69.9   | 34.9   | 16.8   | 12.6   | 18.8   | SA1629 | SA1401  | SAR1649 | SAS1510 | SAV1572 | MW1524 |                                 | hypothetical protein           |                |               | Not Conserved | -2.00                                 | -4.15  | -5.56  | -3.71  |
| WANO14H18_at   | 231.3  | 123.3  | 56.1   | 63.9   | 47.2   | SA1041 | SA0889  |         |         | SAV1036 | MW0917 |                                 | hypothetical protein           |                |               | Not Conserved | -1.88                                 | -4.12  | -3.62  | -4.90  |
| WANO14H1M_at   | 5.6    | 4.9    | 1.4    | 1.6    | 1.4    | SA0110 | SA0121  |         |         |         |        |                                 | hypothetical protein           |                |               | Not Conserved | -1.14                                 | -3.97  | -3.53  | -4.01  |
| WANO14H1V_at   | 19.2   | 11.2   | 6.8    | 5.4    | 4.2    | SA0490 | SA2488  |         |         |         |        |                                 | hypothetical protein           |                |               | Not Conserved | 0.42                                  | -3.89  | -5.48  | -5.48  |
| WANO14G3Q_at   | 16.3   | 13.0   | 4.2    | 4.4    | 4.4    | SA2027 |         |         |         |         |        |                                 | hypothetical protein           |                |               | Not Conserved | -1.25                                 | -3.85  | -3.73  | -3.73  |
| WANO14GDE_at   | 5.3    | 3.3    | 1.4    | 3.3    | 4.6    | SA2571 | SA2343  | SAR2636 | SAS2442 | SAV2556 | MW2477 |                                 | hypothetical protein           |                |               | Not Conserved | -1.61                                 | -3.77  | -1.60  | -1.77  |
| WANO14GHE_at   | 3.9    | 0.9    | 1.1    | 0.7    | 1.9    | SA0514 |         |         |         | SAV0451 |        |                                 | hypothetical protein           |                |               | Not Conserved | -4.21                                 | -3.60  | -5.96  | -2.02  |
| WANO14GPD_at   | 7.2    | 12.2   | 2.0    | 2.6    | 2.2    | SA0849 | SA0738  |         |         | SAV0807 |        |                                 | hypothetical protein           |                |               | Not Conserved | 1.69                                  | -3.54  | -2.77  | -3.21  |
| WANO14HEW_at   | 51.3   | 23.2   | 14.6   | 19.8   | 28.3   | SA1757 |         |         |         |         |        |                                 | hypothetical protein           |                |               | Not Conserved | -2.21                                 | -3.52  | -2.59  | -1.81  |
| WANO14H4B_at   | 2.8    | 3.8    | 0.8    | 1.0    |        | SA2381 | SA2171  | SAR2470 | SAS2273 | SAV2383 | MW2303 |                                 | hypothetical protein           |                |               | Not Conserved | 1.38                                  | -3.48  | -2.67  | -2.89  |
| WANO14H4U_at   | 9.8    | 11.7   | 2.8    | 3.3    | 2.8    | SA1113 | SA0955  | SAR1078 | SAS1038 | SAV1104 | MW0987 |                                 | hypothetical protein           |                |               | Not Conserved | 1.20                                  | -3.45  | -2.99  | -3.46  |
| WANO14H4E_at   | 8.6    | 1.8    | 2.5    | 2.1    | 1.9    | SA1821 | SA1590  | SAR1854 | SAS1695 | SAV1772 | MW1712 |                                 | hypothetical protein           |                |               | Not Conserved | -4.70                                 | -3.42  | -4.17  | -4.58  |
| WANO14I0L_at   | 259.0  | 3.6    | 77.0   | 38.1   | 45.4   | SA2175 | SA1986  | SAR2275 | SAS2085 | SAV2184 | MW2110 |                                 | hypothetical protein           |                |               | Not Conserved | -72.13                                | -3.36  | -6.79  | -6.71  |
| WANO14G2W_at   | 387.0  | 91.1   | 119.2  | 86.9   | 80.0   | SA1895 | SA1857  | SAR1930 | SAS1760 | SAV1939 | MW1778 |                                 | hypothetical protein           |                |               | Not Conserved | -4.25                                 | -3.25  | -4.45  | -4.84  |
| WANO14GWA_at   | 6.7    | 4.3    | 1.8    | 1.7    | 1.5    | SA1366 | SA1168  | SAR1342 | SAS1272 | SAV1332 | MW1219 |                                 | hypothetical protein           |                |               | Not Conserved | -1.34                                 | -3.23  | -3.44  | -3.71  |
| WANO14G6J_at   | 20.7   | 11.7   | 6.7    | 6.0    | 8.1    | SA2241 | SA2049  | SAR2337 | SAS2143 | SAV2252 | MW2171 |                                 | hypothetical protein           |                |               | Not Conserved | -1.76                                 | -3.11  | -3.43  | -2.56  |



| Systematic     | Stat.  | Loc   | 30'   | 120'  | 360'  | COL    | N315   | MRSa    | MSSA    | Mu50    | MW2     | GENE NAME | Protein Function                                                           | TIGR Main Role                                | TIGR Sub Role                                        | Fold change vs stationary phase |             |              |              |
|----------------|--------|-------|-------|-------|-------|--------|--------|---------|---------|---------|---------|-----------|----------------------------------------------------------------------------|-----------------------------------------------|------------------------------------------------------|---------------------------------|-------------|--------------|--------------|
|                |        |       |       |       |       |        |        |         |         |         |         |           |                                                                            |                                               |                                                      | LB                              | 30' in vivo | 120' in vivo | 360' in vivo |
| WANO14H22_at   | 13.5   | 12.8  | 6.4   | 7.3   | 8.7   | SA2087 |        |         |         |         |         |           | hypothetical protein                                                       | Hypothetical proteins                         | Not Conserved                                        | -1.06                           | -2.10       | -1.86        | -1.55        |
| WANO14H11_at   | 6.9    | 2.1   | 3.3   | 2.4   | 2.7   | SA2489 | SA2267 | SAR2568 | SAS2371 | SAV2479 | MW2404  |           | hypothetical protein                                                       | Hypothetical proteins                         | Not Conserved                                        | -3.24                           | -2.09       | -2.89        | -2.59        |
| WANO14GPG_at   | 7.3    | 0.9   | 3.5   | 2.8   | 4.4   | SA0300 | SA0292 | SAR0301 | SA0281  | SAV0304 | MW0281  |           | hypothetical protein                                                       | Hypothetical proteins                         | Not Conserved                                        | 3.1                             | 2.08        | 2.07         | -1.66        |
| WANO14GNV_at   | 2.5    | 2.4   | 1.2   | 1.0   |       | SA0280 | SA0280 |         | SA0267  | SAV0292 | MW0267  |           | hypothetical protein                                                       | Hypothetical proteins                         | Not Conserved                                        | 1.36                            | -2.05       | -2.45        | -2.51        |
| WANO14H8A_at   | 1.7    | 1.8   | 0.8   | 0.7   |       | SA1658 | SA1431 |         | SAS1539 | SAV1603 | MW1553  |           | hypothetical protein                                                       | Hypothetical proteins                         | Not Conserved                                        | 1.05                            | -2.04       | -2.27        | -2.07        |
| WANO1BQJM_x_at | 2.1    | 1.6   | 1.0   | 1.2   |       | SA2250 |        |         |         |         |         |           | hypothetical protein                                                       | Hypothetical proteins                         | Not Conserved                                        | -1.26                           | -2.03       | -1.74        | -1.89        |
| WANO14H36_at   | 3.5    | 4.4   | 1.7   | 1.2   | 1.9   | SA1544 | SA1332 | SAR1577 |         | SAV1501 |         |           | hypothetical protein                                                       | Hypothetical proteins                         | Not Conserved                                        | 1.26                            | -2.01       | -2.92        | -1.88        |
| WANO14GNP_at   | 1.1    | 2.2   | 0.6   | 0.2   |       | SA0278 | SA0278 |         | SAS0265 | SAV0290 | MW0265  | esxB      | hypothetical protein                                                       | Hypothetical proteins                         | Not Conserved                                        | 2.02                            | -2.00       | -2.00        | -6.89        |
| WANO1BQSO_at   | 4.2    | 2.8   | 2.1   | 2.6   | 2.2   | SA1755 |        |         | SAS0581 | SAV0613 | MW0577  |           | hypothetical protein                                                       | Hypothetical proteins                         | Not Conserved                                        | -1.53                           | -2.00       | -1.60        | -1.89        |
| WANO14H6L_at   | 99.9   | 30.9  | 50.3  | 33.9  | 34.7  | SA0689 |        |         | SAR0622 | SAV0613 | MW0577  |           | hypothetical protein                                                       | Hypothetical proteins                         | Not Conserved                                        | -2.95                           | -1.99       | -2.57        | -2.98        |
| WANO1B3AD_at   | 2.3    | 2.2   | 1.1   | 0.9   | 1.2   | #NA    |        |         |         |         |         |           | antisense of uncharacterized phage protein (possible DNA packaging)        | Mobile and extrachromosomal element functions | Role category not yet assigned                       | -1.03                           | -2.12       | -2.66        | -1.92        |
| WANO14GLL_at   | 1.3    | 0.8   | 0.3   |       |       |        |        |         | SAS1885 |         | MW1902  |           | hypothetical protein                                                       | Mobile and extrachromosomal element functions | Prophage functions                                   | -1.54                           | -3.84       | -3.88        | -2.85        |
| WANO14G6H_at   | 6.0    | 3.0   | 2.0   | 1.5   | 2.1   | #NA    |        |         |         |         |         |           | hypothetical protein                                                       | Mobile and extrachromosomal element functions | Prophage functions                                   | -2.01                           | -3.06       | -3.88        | -2.85        |
| WANO1B23A_at   | 5.7    | 1.4   | 0.9   | 1.7   | 0.3   |        |        |         | SAS2573 |         | MW2607  |           | hypothetical protein                                                       | No Data                                       | No Data                                              | -4.70                           | -4.16       | -5.02        | -4.13        |
| WANO14FTJ_at   | 1.8    | 1.0   | 0.6   | 0.6   | 0.7   |        |        |         | SAS0376 |         | MW0375  |           | hypothetical protein                                                       | No Data                                       | No Data                                              | -1.82                           | -3.15       | -2.80        | -2.65        |
| WANO14GR7_at   | 51.8   | 24.9  | 23.3  | 27.8  | 30.7  |        |        |         | SAR2237 | SAV2051 | MW2072  |           | hypothetical protein                                                       | No Data                                       | No Data                                              | -2.09                           | -2.22       | -1.86        | -1.69        |
| WANO14H9X_at   | 37.1   | 29.1  | 14.2  | 12.7  | 10.4  | SA2058 | SA1873 |         | SAR2156 | SAS1973 | SAV2068 |           | penK' protein, putative                                                    | Other categories                              | Plasmid functions                                    | -1.28                           | -2.61       | -2.92        | -3.59        |
| WANO14HND_at   | 21.1   | 23.1  | 9.2   | 7.1   | 7.7   | SA1898 | SA1660 |         | SAR1933 | SAS1763 | SAV1942 | MW1783    | cbf1                                                                       | Other categories                              | Plasmid functions                                    | 1.10                            | -2.30       | -2.96        | -2.74        |
| WANO14GRZ_at   | 1.4    | 1.0   | 0.7   | 0.6   | 1.0   | SA0360 |        |         | SAV0879 |         |         |           | bacteriophage L54, hypothetical protein                                    | Other categories                              | Prophage functions                                   | -1.39                           | -2.16       | -2.25        | -1.46        |
| WANO14HMG_at   | 5.1    | 5.1   | 1.8   | 1.8   | 2.4   | SA1878 |        |         | SAS1746 |         | MW1765  |           | IS1181, transposase                                                        | Other categories                              | Transposon functions                                 | 1.01                            | -2.75       | -2.82        | -2.09        |
| WANO14G5T_at   | 91.0   | 11.3  | 7.1   | 5.8   | 2.1   | SA1955 | SA0899 | SAR1020 | SAS0982 | SAV1048 | MW0390  | sspC      | oligodendroplase                                                           | Protein fate                                  | Degradation of proteins, peptides, and glycopeptides | -8.03                           | -12.72      | -18.86       | -19.61       |
| WANO14G5Z_x_at | 24.0   | 4.4   | 2.2   | 2.1   | 2.1   | SA1057 |        |         | SAR1022 | SAS0984 | SAV1048 | MW0392    | sspA (v8)                                                                  | Protein fate                                  | Degradation of proteins, peptides, and glycopeptides | -5.40                           | -11.13      | -11.22       | -11.41       |
| WANO14G5W_at   | 5.8    | 1.7   | 0.9   | 1.1   | 1.0   | SA1056 | SA0900 | SAR1021 | SAS0983 | SAV1047 | MW0391  | sspB      | staphylokin                                                                | Protein fate                                  | Degradation of proteins, peptides, and glycopeptides | -3.31                           | -6.11       | -6.42        | -5.51        |
| WANO14G5T_y_at | 13.9   | 19.5  | 2.4   | 1.5   | 1.6   | SA2307 | SA1814 |         | SAR1022 | SAS0984 | SAV1048 | MW0392    | staphylokin                                                                | Protein fate                                  | Degradation of proteins, peptides, and glycopeptides | -5.4                            | -6.26       | -6.34        | -5.86        |
| WANO14HNN_at   | 22.1   | 43.4  | 4.4   | 4.6   | 4.7   | SA1005 | SA0859 | SAR0968 | SAS0870 | SAV1000 | MW0882  | pepF      | glutamyl endopeptidase precursor                                           | Protein fate                                  | Degradation of proteins, peptides, and glycopeptides | -1.96                           | -5.08       | -4.83        | -4.75        |
| WANO14GDA_at   | 11.4   | 4.3   | 2.7   | 1.3   | 1.7   | SA2563 | SA2336 | SAR2628 | SA2434  | SAV2548 | MW2469  | clpC      | ATP-dependent Clp protease, ATP-binding subunit ClpC                       | Protein fate                                  | Degradation of proteins, peptides, and glycopeptides | -2.63                           | -4.27       | -9.08        | -6.57        |
| WANO14FYE_at   | 4.8    | 5.3   | 1.3   | 1.6   | 1.3   | SA1756 | SA1530 | SAR1786 | SAS1635 | SAV1708 | MW1651  |           | proline dipeptidase                                                        | Protein fate                                  | Degradation of proteins, peptides, and glycopeptides | 1.09                            | -3.73       | -3.11        | -3.74        |
| WANO14H0L_at   | 15.8   | 2.5   | 1.9   | 1.4   | 2.1   | SA0257 | SA0815 | SAR0912 | SAS1326 | SAV1959 | MW1350  | sspB      | oligodendroplase                                                           | Protein fate                                  | Degradation of proteins, peptides, and glycopeptides | 2.2                             | -2.64       | -2.61        | -3.13        |
| WANO14HLL_at   | 12.5   | 5.1   | 3.6   | 7.2   | 14.8  | SA0979 | SA0833 | SAR0938 | SA0845  | SAV0975 | MW0857  | clpB      | ATP-dependent Clp protease, ATP-binding subunit ClpB                       | Protein fate                                  | Degradation of proteins, peptides, and glycopeptides | -2.48                           | -3.50       | -1.74        | -1.18        |
| WANO14H3L_at   | 7.4    | 5.0   | 2.1   | 2.0   | 2.2   | SA1555 | SA1343 | SAR1590 | SAS1451 | SAV1512 | MW1465  | pepT      | peptidase T                                                                | Protein fate                                  | Degradation of proteins, peptides, and glycopeptides | -1.49                           | -3.48       | -3.69        | -3.35        |
| WANO14G15_at   | 9.0    | 14.0  | 8.2   | 8.8   | 9.8   | SA0570 | SA0463 | SAR0528 | SAS0452 | SAV0525 | MW0480  | clpC      | ATP-dependent Clp protease, ATP-binding subunit ClpC, authentic frameshift | Protein fate                                  | Degradation of proteins, peptides, and glycopeptides | -1.14                           | -3.36       | -3.03        | -1.96        |
| WANO14H17L_at  | 15.7   | 17.1  | 5.2   | 5.1   | 3.9   | SA4119 | SA1216 | SAR1197 | SAS1366 | SAV1394 | MW1272  | pepF      | serine protease HtrA                                                       | Protein fate                                  | Degradation of proteins, peptides, and glycopeptides | 3.9                             | -1.99       | -3.02        | -4.05        |
| WANO14FYU_at   | 17.6   | 28.2  | 6.4   | 6.1   | 8.1   | SA1757 | SA1549 | SAR1805 | SAS1654 | SAV1728 | MW1670  | htrA      | serine protease HtrA                                                       | Protein fate                                  | Degradation of proteins, peptides, and glycopeptides | 1.61                            | -2.74       | -2.90        | -2.16        |
| WANO14G19_at   | 8.0    | 10.0  | 3.4   | 3.0   | 3.9   | SA2463 | SA2244 | SAR2545 | SA2347  | SAV2455 | MW2379  |           | peptidase M42 family                                                       | Protein fate                                  | Degradation of proteins, peptides, and glycopeptides | -1.13                           | -2.66       | -2.96        | -2.31        |
| WANO14H0R_at   | 15.1   | 5.7   | 3.9   | 2.8   | 3.2   | SA1795 | SA1566 | SAR1923 | SAS1671 | SAV1745 | MW1688  |           | peptidase M42 family                                                       | Protein fate                                  | Degradation of proteins, peptides, and glycopeptides | -2.17                           | -2.62       | -2.61        | -3.13        |
| WANO14H9J_at   | 33.9   | 35.9  | 13.5  | 11.8  | 10.2  | SA1801 | SA1572 | SAR1836 | SAS1677 | SAV1751 | MW1694  | pepV      | peptidase, M20/M25/M40 family                                              | Protein fate                                  | Degradation of proteins, peptides, and glycopeptides | 1.06                            | -2.51       | -2.87        | -3.32        |
| WANO14HKH_at   | 12.5   | 15.3  | 5.1   | 4.7   | 4.9   | SA0945 | SA0803 | SAR0904 | SAS0812 | SAV0942 | MW0824  | ampA      | cytosol aminopeptidase family protein                                      | Protein fate                                  | Degradation of proteins, peptides, and glycopeptides | 1.23                            | -2.42       | -2.68        | -2.52        |
| WANO14G1C_at   | 5.4    | 12.9  | 2.3   | 2.3   | 3.4   | SA0595 | SA0507 | SAR0554 | SAS0507 | SAV0549 | MW0504  |           | peptidase, M20/M25/M40 family                                              | Protein fate                                  | Degradation of proteins, peptides, and glycopeptides | 2.40                            | -2.36       | -2.38        | -1.56        |
| WANO14G1D_at   | 3.2    | 2.1   | 1.5   | 1.3   | 2.1   | SA1397 | SA1194 |         | SAS1878 |         | MW1895  |           | peptidase, M20/M25/M40 family                                              | Protein fate                                  | Degradation of proteins, peptides, and glycopeptides | -1.53                           | -2.16       | -2.33        | -1.78        |
| WANO14G0Z_at   | 4.3    | 4.5   | 2.1   | 1.9   | 2.9   | SA1897 | SA1659 | SAR1932 | SAS1762 | SAV1841 | MW1782  | prsA      | protease maturation protein                                                | Protein fate                                  | Degradation of proteins, peptides, and glycopeptides | 1.04                            | -2.06       | -2.33        | -1.47        |
| WANO14G0O_at   | 9.0    | 6.0   | 2.4   | 2.1   | 3.1   | SA2671 | SA2442 | SAR2728 | SAS2535 | SAV2649 | MW2570  | secA2     | secA family protein                                                        | Protein fate                                  | Protein and peptide secretion and trafficking        | -1.48                           | -3.69       | -4.32        | -2.92        |
| WANO14A80-sec1 | 11.4   | 30.1  | 3.6   | 4.0   | 5.9   | SA2671 | SA2442 | SAR2728 | SAS2535 | SAV2649 | MW2570  | secA2     | secA family protein                                                        | Protein fate                                  | Protein and peptide secretion and trafficking        | -1.48                           | -3.69       | -4.32        | -2.92        |
| WANO14A80-sec2 | 14.5   | 31.0  | 5.3   | 4.9   | 5.0   | SA2676 | SA2676 | SAR2734 | SAS2540 | SAV2654 | MW2575  | ssaA      | LPXTG-motif cell wall anchor domain protein                                | Protein fate                                  | Protein and peptide secretion and trafficking        | 2.13                            | -2.75       | -2.96        | -2.92        |
| WANO14G0C5_at  | 1.5    | 2.6   | 0.6   | 0.5   |       | SA2674 | SA2445 |         | SAS2538 | SAV2652 | MW2573  | asp1      | accessory secretory protein Asp1                                           | Protein fate                                  | Protein and peptide secretion and trafficking        | 1.70                            | -2.71       | -2.82        | -2.01        |
| WANO14G0C2_at  | 2.9    | 4.4   | 1.2   |       | 1.5   | SA2673 | SA2444 | SAR2730 | SAS2537 | SAV2651 | MW2572  | asp2      | accessory secretory protein Asp2                                           | Protein fate                                  | Protein and peptide secretion and trafficking        | -1.62                           | -2.43       | -2.63        | -2.01        |
| WANO14HVE_at   | 15.2   | 11.6  | 3.1   | 2.7   | 2.6   | SA1836 | SA1636 | SAR2216 | SAS1935 | SAV2029 | MW1953  | groEL     | chaperonin, 60 kDa                                                         | Protein fate                                  | Protein folding and stabilization                    | -1.31                           | -4.92       | -5.64        | -5.02        |
| WANO14H8V_at   | 52.2   | 31.1  | 14.8  | 17.6  | 24.1  | SA1637 | SA1409 | SAR1657 | SAS1518 | SAV1580 | MW1532  | dnaK      | dnaK protein, 10 kDa                                                       | Protein fate                                  | Protein folding and stabilization                    | -1.68                           | -3.53       | -2.96        | -2.17        |
| WANO14H91_at   | 5.7    | 5.0   | 1.7   | 1.8   | 2.6   | SA2017 | SA1837 | SAR2117 | SAS1936 | SAV2030 | MW1954  | groES     | peptidyl-prolyl cis-trans isomerase, cyclophilin-type                      | Protein fate                                  | Protein folding and stabilization                    | -1.15                           | -3.42       | -3.15        | -2.18        |
| WANO14H0K_at   | 18.4   | 20.5  | 8.0   | 7.3   | 9.6   | SA0257 | SA0815 | SAR0912 | SAS1326 | SAV1959 | MW1350  | sspB      | oligodendroplase                                                           | Protein fate                                  | Protein folding and stabilization                    | 1.11                            | -2.31       | -2.52        | -1.93        |
| WANO14HRZ_at   | 49.0   | 45.7  | 21.1  | 19.0  | 17.8  | SA1946 | SA1704 | SAR1978 | SAS1810 | SAV1888 | MW1828  | map       | methionine aminopeptidase, type I                                          | Protein fate                                  | Protein modification and repair                      | -1.07                           | -2.32       | -2.57        | -2.75        |
| WANO14HD7_at   | 17.0   | 20.3  | 7.4   | 5.7   | 7.2   | SA0826 | SA0716 | SAR0815 | SA0726  | SAV0761 | MW0723  | igt       | prolipoprotein diacylglycerol transferase                                  | Protein fate                                  | Protein modification and repair                      | 1.20                            | -2.28       | -2.99        | -2.35        |
| WANO14H5L_at   | 11.7   | 8.7   | 5.3   | 4.9   | 3.9   | SA1591 | SA1363 | SAR1610 | SAS1471 | SAV1533 | MW1485  |           | lipote-protein ligase A                                                    | Protein fate                                  | Protein modification and repair                      | -1.35                           | -2.23       | -2.41        | -3.02        |
| WANO14GWR_at   | 10.4   | 10.4  | 5.2   | 3.6   | 2.8   | SA2635 | SA2410 | SAR1373 | SAS1301 | SAV1361 | MW1248  | msrA      | peptide methionine sulfide reductase                                       | Protein synthesis                             | Protein modification and repair                      | -1.62                           | -2.77       | -5.08        | -4.19        |
| WANO14GUP_at   | 5.1    | 3.1   | 0.9   | 1.0   | 1.2   | SA0413 | SA0330 |         |         |         |         |           | ribosomal-protein-serine acetyltransferase, putative                       | Protein synthesis                             | Ribosomal proteins: synthesis and modification       | -1.65                           | -2.23       | -2.41        | -3.02        |
| WANO14GCVJ_at  | 1126.1 | 80.0  | 562.5 | 658.0 | 695.7 | SA1238 | SA1067 | SAR1200 | SAS1158 | SAV1224 | MW1129  | rpmB      | ribosomal protein L28                                                      | Protein synthesis                             | Ribosomal proteins: synthesis and modification       | -1.41                           | -2.00       | -1.71        | -1.62        |
| WANO14H4CJ_at  | 32.5   | 18.9  | 7.9   | 8.1   | 14.8  | SA0285 | SA0707 | SAR0806 | SAS0717 | SAV0752 | MW0714  |           | ribosomal subunit interface protein                                        | Protein synthesis                             | Translation factors                                  | -1.72                           | -4.13       | -3.59        | -2.19        |
| WANO14H4D_at   | 86.4   | 40.8  | 18.0  | 15.0  | 14.3  | SA1622 | SA1394 | SAR1642 | SAS1503 | SAV1565 | MW1517  | gylS      | glycyl-IRNA synthetase                                                     | Protein synthesis                             | RNA aminoacylation                                   | -2.42                           | -2.61       | -2.87        | -2.93        |
| WANO14FTX_at   | 6.5    | 5.1   | 1.7   | 1.5   | 1.9   | SA1290 | SA1114 | SAR1247 | SAS1205 | SAV1271 | MW1154  | trbB      | IRNA pseudouridine 55 synthase                                             | Protein synthesis                             | IRNA and RNA base modification                       | -5.18                           | -3.19       | -3.56        | -2.87        |
| WANO14G9T_at   | 20.0   | 19.8  | 5.2   | 3.6   | 2.8   | SA2635 | SA2410 | SAR2695 | SAS2593 | SAV2817 | MW2537  | nrdD      | 2'-deoxyribonucleotide metabolism                                          | Protein synthesis                             | 2-Deoxyribonucleotide metabolism                     | -3.66                           | -3.84       | -5.52        | -7.11        |
| WANO14G0Q_at   | 7.2    | 7.4   | 2.6   | 2.9   | 3.0   | SA0024 | SA0022 |         |         |         |         |           | 5-nucleotidase                                                             | Protein synthesis                             | Nucleotide and nucleoside interconversions           | 1.02                            | -2.72       | -2.45        | -2.40        |
| WANO14HPG_at   | 5.3    | 5.8   | 2.6   | 2.3   | 2.5   | SA1031 | SA0881 | SAR0994 | SAS0957 | SAV1025 | MW0895  |           | 2, 3'-cyclic-nucleotide 2'-phosphodiesterase, putative                     | Protein synthesis                             | Other                                                | 1.09                            | -2.02       | -2.36        | -2.13        |
| WANO14GVY_at   | 45.7   | 110.7 | 10.5  | 12.4  | 15.5  | SA0460 | SA0375 | SAR0408 | SAS0386 | SAV0390 | MW0386  | guaB      | inosine-5-monophosphate dehydrogenase                                      | Protein synthesis                             | Purine ribonucleotide biosynthesis                   | 2.42                            | -4.35       | -3.70        | -2.95        |
| WANO14G0Z2_at  | 57.5   | 109.9 | 15.4  | 15.3  | 17.9  | SA0461 | SA0376 | SAR0409 | SAS0387 | SAV0391 | MW0387  | guaA      | GMP synthase                                                               | Protein synthesis                             | Purine ribonucleotide biosynthesis                   | 1.61                            | -3.02       | -3.76        | -3.21        |
| WANO14GVU_at   | 13.4   | 66.9  | 2.9   | 4.2   | 5.2   | SA0458 | SA0373 | SAR0406 | SAS0384 | SAV0388 | MW0384  | xprT      | xanthine phosphoribosyltransferase                                         | Protein synthesis                             | Salvage of nucleosides and nucleotides               | 5.00                            | -4.59       | -3.15        | -2.59        |
| WANO14I08_at   | 21.3   | 14.3  |       |       |       |        |        |         |         |         |         |           |                                                                            |                                               |                                                      |                                 |             |              |              |

| Systematic     | Stat. | Loc   | 30'   | 120' | 360' | COL    | N315   | MRSa    | MSSA    | Mu50    | MW2    | GENE NAME | Protein Function                                                   | TIGR Main Role                 | TIGR Sub Role                              | Fold change vs stationary phase            |             |              |              |       |
|----------------|-------|-------|-------|------|------|--------|--------|---------|---------|---------|--------|-----------|--------------------------------------------------------------------|--------------------------------|--------------------------------------------|--------------------------------------------|-------------|--------------|--------------|-------|
|                |       |       |       |      |      |        |        |         |         |         |        |           |                                                                    |                                |                                            | LB                                         | 30' in vivo | 120' in vivo | 360' in vivo |       |
| WANO14HE4_at   | 8.5   | 5.0   | 2.4   | 3.1  | 3.2  | SA1740 | SA1516 | SAR1772 | SAS1621 | SAV1693 | MW1637 | phoP      | DNA-binding response regulator                                     | Signal transduction            | Two-component systems                      | -1.72                                      | -3.51       | -2.76        | -2.61        |       |
| WANO14CKR_at   | 10.8  | 19.7  | 3.5   | 4.1  | 3.5  | SA0245 | SA0250 | SAR0257 | SAS0237 | SAV0260 | MW0236 | lysI      | sensor histidine kinase                                            | Signal transduction            | Two-component systems                      | 1.82                                       | -3.07       | -2.64        | -3.05        |       |
| WANO14GVY_x_at | 8.8   | 8.1   | 3.3   | 3.4  | 3.5  | SA0019 | SA0018 | SAR0019 | SAS0018 | SAV0018 | MW0018 | yyfC      | DNA-binding response regulator                                     | Signal transduction            | Two-component systems                      | -1.01                                      | -2.72       | -2.64        | -2.52        |       |
| WANO14H05_at   | 6.9   | 5.5   | 3.0   | 2.9  | 2.8  | SA1906 | SA1667 | SAR1940 | SAS1770 | SAV1949 | MW1790 | yyfC      | sensor histidine kinase, putative                                  | Signal transduction            | Two-component systems                      | -1.26                                      | -2.26       | -2.42        | -2.48        |       |
| WANO14G8A_at   | 2.3   | 2.7   | 1.0   | 1.1  | 1.2  | SA2358 | SA2151 | SAR2447 | SAS2252 | SAV2361 | MW2282 |           | DNA-binding response regulator                                     | Signal transduction            | Two-component systems                      | 1.20                                       | -2.19       | -2.01        | -1.97        |       |
| WANO14GN3_at   | 18.9  | 23.6  | 8.7   | 8.8  | 6.0  | SA0020 | SA0018 | SAR0019 | SAS0019 | SAV0019 | MW0019 | yyeC      | sensor histidine kinase                                            | Signal transduction            | Two-component systems                      | 1.25                                       | -2.18       | -2.79        | -3.17        |       |
| WANO14HX_at    | 7.2   | 7.5   | 3.4   | 2.7  | 1.9  | SA0717 | SA0815 | SAR0717 | SAS0625 | SAV0660 | MW0622 |           | sensor histidine kinase                                            | Signal transduction            | Two-component systems                      | 1.03                                       | -2.16       | -2.68        | -3.81        |       |
| WANO14G4T_at   | 2.4   | 2.0   | 1.1   | 1.1  | 1.2  | SA2071 | SA1883 | SAR2167 | SAS1984 | SAV2079 | MW2003 | kdpE      | DNA-binding response regulator                                     | Signal transduction            | Two-component systems                      | -1.16                                      | -2.13       | -2.20        | -1.92        |       |
| WANO14GVZ_at   | 146.1 | 17.8  | 66.2  | 36.2 | 30.8 | SA0540 | SA0455 | SAR0455 | SAS0454 | SAV0497 | MW0452 |           | endonuclease II-PSP, putative                                      | Transcription                  | Degradation of RNA                         | -8.22                                      | -2.21       | -4.04        | -4.75        |       |
| WANO14G1Y_at   | 86.3  | 7.5   | 30.5  | 17.9 | 19.2 | SA1941 | SA1699 | SAR1973 | SAS1805 | SAV1953 | MW1923 |           | ribonuclease DN, putative                                          | Transcription                  | RNA processing                             | -8.87                                      | -2.17       | -3.71        | -3.46        |       |
| WANO14GBI_at   | 11.3  | 19.9  | 1.5   | 1.8  | 2.1  | SA2441 | SA2227 | SAR2528 | SAS2330 | SAV2438 | MW2362 |           | amino acid permease                                                | Transport and binding proteins | Amino acids, peptides and amines           | 1.76                                       | -7.75       | -6.33        | -5.36        |       |
| WANO14GZP_at   | 29.5  | 7.5   | 4.0   | 3.1  | 3.7  | SA1476 | SA1270 | SAR1449 | SAS1380 | SAV1437 | MW1326 |           | amino acid permease                                                | Transport and binding proteins | Amino acids, peptides and amines           | -3.96                                      | -7.44       | -6.65        | -8.00        |       |
| WANO14G0K_at   | 12.1  | 36.2  | 3.3   | 2.2  | 1.8  | SA2450 | SA2234 | SAR2535 | SAS2337 | SAV2445 | MW2369 | opuCD     | amino acid ABC transporter, permease protein                       | Transport and binding proteins | Amino acids, peptides and amines           | 3.00                                       | -3.64       | -5.55        | -6.84        |       |
| WANO14H0C_at   | 12.8  | 1.7   | 3.9   | 3.1  | 3.9  | SA1728 | SA1595 | SAR1761 | SAS1610 | SAV1691 | MW1625 | lypP      | amino acid transporter, putative                                   | Transport and binding proteins | Amino acids, peptides and amines           | -3.52                                      | -4.11       | -4.77        | -4.77        |       |
| WANO14G0N_at   | 3.5   | 12.0  | 1.1   | 0.7  | 1.3  | SA2451 | SA2235 | SAR2536 | SAS2338 | SAV2446 | MW2370 | opuCC     | amino acid transporter, putative                                   | Transport and binding proteins | Amino acids, peptides and amines           | 3.42                                       | -3.17       | -4.72        | -2.71        |       |
| WANO14G0R_at   | 2.2   | 8.9   | 0.7   | 0.8  | 0.8  | SA2453 | SA2237 | SAR2538 | SAS2340 | SAV2448 | MW2372 | opuCA     | amino acid ABC transporter, ATP-binding protein                    | Transport and binding proteins | Amino acids, peptides and amines           | 4.02                                       | -3.00       | -2.84        | -2.76        |       |
| WANO14G2C_at   | 54.4  | 26.1  | 25.6  | 27.1 | 23.5 | SA1963 | SA1718 | SAR1984 | SAS1825 | SAV1952 | MW1943 | puIP      | proline permease                                                   | Transport and binding proteins | Amino acids, peptides and amines           | -1.22                                      | -2.08       | -2.12        | -2.31        |       |
| WANO14H41_at   | 9.0   | 7.4   | 3.3   | 2.6  | 2.6  | SA0750 | SA0645 | SAR0743 | SAS0655 | SAV0690 | MW0652 |           | anion transporter family protein                                   | Transport and binding proteins | Anions                                     | -1.22                                      | -2.72       | -3.50        | -3.47        |       |
| WANO14G6Z_at   | 99.4  | 27.2  | 2.1   | 2.1  | 2.8  | SA0178 | SA0186 | SAR0193 | SAS0167 | SAV0192 | MW0166 |           | PTS system component                                               | Transport and binding proteins | Carbohydrates, organic alcohols, and acids | 3.65                                       | -48.11      | -46.80       | -35.64       |       |
| WANO14BXT_at   | 6.4   | 6.5   | 1.1   | 1.1  | 1.6  |        |        |         |         |         |        |           | phosphotransferase system enzyme II .                              | glucose-specific, factor IIB   | Transport and binding proteins             | Carbohydrates, organic alcohols, and acids | -1.01       | -5.73        | -5.80        | -3.98 |
| WANO14G2F_at   | 9.6   | 85.1  | 1.8   | 1.8  | 1.9  | SA0516 | SA0432 | SAR0473 | SAS0431 | SAV0474 | MW0428 | trpP      | PTS system component                                               | Transport and binding proteins | Carbohydrates, organic alcohols, and acids | 0.88                                       | -5.31       | -5.21        | -5.15        |       |
| WANO14G5W_at   | 8.5   | 1.1   | 2.1   | 1.4  | 2.6  | SA2148 | SA1962 | SAR2246 | SAS2059 | SAV2158 | MW2084 | mlpA      | PTS system, mannitol-specific component                            | Transport and binding proteins | Carbohydrates, organic alcohols, and acids | -7.80                                      | -4.06       | -5.89        | -3.27        |       |
| WANO14G4Z_at   | 6.5   | 5.7   | 1.7   | 2.0  | 2.4  | SA2514 | SA2293 | SAR2582 | SAS2390 | SAV2505 | MW2423 |           | GnpP family permease                                               | Transport and binding proteins | Carbohydrates, organic alcohols, and acids | -1.16                                      | -3.83       | -3.34        | -2.75        |       |
| WANO14H0D_at   | 90.4  | 37.1  | 33.1  | 28.4 | 27.1 | SA0393 | SA0106 | SAR0113 | SAS0394 | SAV0110 | MW0393 | lcpP      | L-lactate permease                                                 | Transport and binding proteins | Carbohydrates, organic alcohols, and acids | -3.22                                      | -2.44       | -2.73        | -3.10        |       |
| WANO14FV8_at   | 7.8   | 8.4   | 2.9   | 1.9  | 2.6  | SA2316 | SA2114 | SAR2408 | SAS2216 | SAV2323 | MW2244 | gHcC      | PTS system component                                               | Transport and binding proteins | Carbohydrates, organic alcohols, and acids | 1.07                                       | -2.70       | -4.05        | -3.00        |       |
| WANO14G7F_at   | 2.5   | 1.9   | 1.0   | 1.2  | 1.2  | SA0194 | SA0208 | SAR0207 | SAS0191 | SAV0215 | MW0191 | malF      | maltose ABC transporter, permease protein                          | Transport and binding proteins | Carbohydrates, organic alcohols, and acids | -1.30                                      | -2.56       | -2.07        | -2.00        |       |
| WANO14FV6_at   | 6.2   | 23.1  | 2.7   | 3.5  | 4.2  | SA0400 | SA0318 | SAR0326 | SAS0306 | SAV0329 | MW0306 | sgaT      | SgaT protein, putative                                             | Transport and binding proteins | Carbohydrates, organic alcohols, and acids | 3.73                                       | -2.27       | -1.79        | -1.47        |       |
| WANO14H0E_at   | 208.7 | 195.4 | 138.3 | 13.3 | 19.2 | SA0155 | SA0163 | SAR0163 | SAS0155 | SAV0163 | MW0163 | pttH      | PTS system, fructose-specific IABC component                       | Transport and binding proteins | Carbohydrates, organic alcohols, and acids | -1.00                                      | -2.98       | -2.42        | -2.33        |       |
| WANO14G0V_at   | 6.7   | 31.3  | 3.2   | 5.0  | 7.6  | SA2434 | SA2434 | SAR2720 | SAS2527 | SAV2641 | MW2562 |           | PTS system, fructose-specific IABC component                       | Transport and binding proteins | Carbohydrates, organic alcohols, and acids | -4.64                                      | -2.08       | -1.34        | 1.13         |       |
| WANO14GFL_at   | 0.8   | 0.6   | 0.4   | 0.9  | 0.9  | SA0195 | SA0209 | SAR0208 | SAS0192 | SAV0216 | MW0192 | malG      | maltose ABC transporter, permease protein                          | Transport and binding proteins | Carbohydrates, organic alcohols, and acids | -1.42                                      | -2.06       | -2.62        | 1.08         |       |
| WANO14H7D_at   | 45.3  | 14.9  | 8.2   | 7.2  | 8.1  | SA1975 | SA1732 | SAR2009 | SAS1840 | SAV1916 | MW1957 |           | sodium-dependent transporter                                       | Transport and binding proteins | Cations                                    | -3.04                                      | -3.74       | -6.32        | -5.57        |       |
| WANO14FZ2_s_at | 6.2   | 2.8   | 1.4   | 1.3  | 2.0  | SA0155 | SA0163 | SAR0170 | SAS0143 | SAV0168 | MW0143 |           | cation efflux family protein                                       | Transport and binding proteins | Cations                                    | 4.01                                       | -2.17       | -4.27        | -3.10        |       |
| WANO14GFI_at   | 16.2  | 3.5   | 3.9   | 2.8  | 2.6  | SA2721 | SA2489 | SAR2778 | SAS2582 | SAV2688 | MW2617 | ureH      | high affinity nickel transporter                                   | Transport and binding proteins | Cations                                    | -4.64                                      | -4.17       | -5.83        | -6.18        |       |
| WANO14H74_at   | 38.4  | 4.0   | 10.8  | 5.6  | 8.8  | SA0685 | SA0583 | SAR0635 | SAS0594 | SAV0627 | MW0596 |           | Na+/H+ antiporter component                                        | Transport and binding proteins | Cations                                    | -9.59                                      | -3.54       | -6.91        | -4.37        |       |
| WANO14MIV_at   | 15.0  | 2.5   | 4.4   | 3.3  | 4.9  | SA0080 | SA0079 | SAR0081 | SAS0080 | SAV0023 | MW0080 |           | Na+/H+ antiporter component                                        | Transport and binding proteins | Cations                                    | -4.56                                      | -2.41       | -4.52        | -3.02        |       |
| WANO14H1L_at   | 3.6   | 38.8  | 1.1   | 2.0  | 3.8  | SA0311 | SA0303 | SAR0311 | SAS0291 | SAV0314 | MW0291 |           | sodium:solute symporter family protein                             | Transport and binding proteins | Cations                                    | 10.79                                      | -3.34       | -1.80        | 1.06         |       |
| WANO14H76_at   | 27.2  | 2.8   | 8.2   | 4.2  | 6.3  | SA0686 | SA0584 | SAR0585 | SAS0595 | SAV0628 | MW0591 |           | Na+/H+ antiporter component                                        | Transport and binding proteins | Cations                                    | -9.73                                      | -3.32       | -6.42        | -4.29        |       |
| WANO14G0J_at   | 26.6  | 68.3  | 8.1   | 6.6  | 8.1  | SA1114 | SA0956 | SAR1079 | SAS1040 | SAV1105 | MW0988 |           | Mg2+/Fe2+ transporter, NRAMP family                                | Transport and binding proteins | Cations                                    | 2.67                                       | -3.30       | -4.36        | -4.04        |       |
| WANO14H0Z_at   | 19.3  | 1.9   | 4.1   | 1.8  | 4.9  | SA0692 | SA0581 | SAR0633 | SAS0692 | SAV0625 | MW0598 |           | Na+/H+ antiporter component                                        | Transport and binding proteins | Cations                                    | -4.93                                      | -3.22       | -4.77        | -2.72        |       |
| WANO14H72_at   | 5.7   | 1.2   | 1.9   | 1.2  | 2.2  | SA0684 | SA0582 | SAR0634 | SAS0593 | SAV0626 | MW0589 |           | Na+/H+ antiporter component                                        | Transport and binding proteins | Cations                                    | -4.75                                      | -3.03       | -4.78        | -2.65        |       |
| WANO14MIV_at   | 5.4   | 0.9   | 1.9   | 1.5  | 2.8  | SA0681 | SA0580 | SAR0632 | SAS0591 | SAV0624 | MW0587 |           | Na+/H+ antiporter component                                        | Transport and binding proteins | Cations                                    | -5.72                                      | -2.82       | -3.68        | -1.95        |       |
| WANO14H70_at   | 51.3  | 26.3  | 15.4  | 25.2 | 18.1 | SA0687 | SA0586 | SAR0637 | SAS0596 | SAV0629 | MW0592 |           | Na+/H+ antiporter                                                  | Transport and binding proteins | Cations                                    | -4.80                                      | -2.69       | -3.33        | -2.21        |       |
| WANO14CS2T_at  | 7.8   | 11.6  | 3.1   | 3.2  | 3.1  | #N/A   |        |         |         |         |        |           | molibdate-binding protein                                          | Transport and binding proteins | Cations                                    | 1.48                                       | -2.50       | -2.41        | -2.51        |       |
| WANO14FWT_at   | 14.8  | 5.3   | 6.1   | 6.5  | 7.8  | SA2292 | SA2094 | SAR2385 | SAS2191 | SAV2301 | MW2219 |           | Na+/H+ antiporter                                                  | Transport and binding proteins | Cations                                    | -2.80                                      | -2.42       | -2.29        | -1.89        |       |
| WANO14H1V_at   | 3.2   | 5.3   | 1.4   | 1.1  | 1.6  | SA2272 | SA2074 | SAR2074 | SAS2074 | SAV2074 | MW2074 | moaA      | molybdenum ABC transporter, molybdenum-binding protein             | Transport and binding proteins | Cations                                    | 1.86                                       | -2.32       | -2.87        | -1.99        |       |
| WANO14GRB_at   | 82.0  | 72.4  | 23.6  | 26.9 | 22.4 | SA0955 | SA0913 | SAR0914 | SAS0822 | SAV0952 | MW0934 | mnhA      | Na+/H+ antiporter, MnhA component                                  | Transport and binding proteins | Cations                                    | -2.40                                      | -2.20       | -1.93        | -1.77        |       |
| WANO14GRB_at   | 8.2   | 10.0  | 3.8   | 3.6  | 3.1  | SA0953 | SA0811 | SAR0912 | SAS0820 | SAV0950 | MW0832 | mnhC      | Na+/H+ antiporter, MnhC component                                  | Transport and binding proteins | Cations                                    | 1.21                                       | -2.18       | -2.27        | -2.67        |       |
| WANO14GTM_at   | 2.3   | 3.2   | 1.1   | 1.2  | 1.6  | SA1084 | SA0027 | SAR1049 | SAS1011 | SAV1075 | MW0958 | cbiQ      | cobalt transport family protein                                    | Transport and binding proteins | Cations                                    | 1.38                                       | -2.16       | -1.84        | -1.40        |       |
| WANO14FR5_at   | 10.5  | 4.1   | 1.8   | 1.6  | 1.8  | SA0170 | SA0168 | SAR0170 | SAS0143 | SAV0168 | MW0143 | efflux    | cation-efflux system membrane protein CzeD                         | Transport and binding proteins | Cations and iron carrying compounds        | 1.01                                       | -2.17       | -2.67        | -3.02        |       |
| WANO14G26_at   | 41.8  | 53.9  | 11.8  | 18.5 | 18.5 | SA1962 | SA1709 | SAR1984 | SAS1815 | SAV1993 | MW1934 |           | ferritin family protein                                            | Transport and binding proteins | Cations and iron carrying compounds        | 3.29                                       | -3.64       | -2.27        | -2.26        |       |
| WANO14H8D_at   | 2.3   | 2.6   | 0.8   | 0.8  | 0.8  | SA0657 | SA0657 | SAR0619 | SAS0578 | SAV0610 | MW0634 | fecCD     | iron compound ABC transporter, permease protein                    | Transport and binding proteins | Cations and iron carrying compounds        | 1.15                                       | -2.93       | -2.83        | -2.70        |       |
| WANO14HEA_at   | 4.5   | 9.1   | 2.0   | 2.4  | 2.5  | SA0689 | SA0566 | SAR0618 | SAS0577 | SAV0609 | MW0573 |           | iron compound ABC transporter, substrate-binding protein, putative | Transport and binding proteins | Cations and iron carrying compounds        | 2.01                                       | -2.28       | -1.85        | -1.82        |       |
| WANO14H6A_at   | 27.9  | 13.3  | 1.9   | 1.8  | 2.0  | SA0203 | SA0203 | SAR0216 | SAS0203 | SAV0203 | MW0203 | afuA      | ABC transporter, substrate-binding protein, putative               | Transport and binding proteins | Cations and iron carrying compounds        | -1.00                                      | -2.69       | -3.33        | -2.21        |       |
| WANO14GVX_at   | 4.9   | 131.8 | 7.1   | 10.5 | 9.4  | SA0459 | SA0374 | SAR0407 | SAS0365 | SAV0389 | MW0365 | puX       | xanthine permease                                                  | Transport and binding proteins | Nucleosides, purines and pyrimidines       | 4.73                                       | -3.91       | -2.65        | -2.86        |       |
| WANO14H80_at   | 99.1  | 78.1  | 18.0  | 38.4 | 39.5 | SA1319 | SA1140 | SAR1274 | SAS1232 | SAV1300 | MW1182 | glpF      | glycerol uptake facilitator protein                                | Transport and binding proteins | Other                                      | -1.27                                      | -5.51       | -2.58        | -2.51        |       |
| WANO14G2M_at   | 8.0   | 3.5   | 1.7   | 1.8  | 2.8  | SA1475 | SA1269 | SAR1448 | SAS1379 | SAV1436 | MW1325 |           | drug transporter, putative                                         | Transport and binding proteins | Other                                      | -2.30                                      | -4.82       | -4.56        | -2.91        |       |
| WANO14GPI_at   | 24.9  | 23.7  | 0.9   | 1.9  | 1.8  | SA0294 | SA0294 | SAR0294 | SAS0294 | SAV0294 | MW0294 |           | acid                                                               |                                |                                            |                                            |             |              |              |       |

| Systematic   | Stat. | Loc   | 30'  | 120' | 360' | COL    | N315   | MRSa    | MSSA    | Mu50    | MW2    | GENE NAME | Protein Function                                                              | TIGR Main Role   | TIGR Sub Role                  | Fold change vs stationary phase |             |              |              |
|--------------|-------|-------|------|------|------|--------|--------|---------|---------|---------|--------|-----------|-------------------------------------------------------------------------------|------------------|--------------------------------|---------------------------------|-------------|--------------|--------------|
|              |       |       |      |      |      |        |        |         |         |         |        |           |                                                                               |                  |                                | LB                              | 30' in vivo | 120' in vivo | 360' in vivo |
| WANO14HNH_at | 81.4  | 15.3  | 16.9 | 17.4 | 35.3 | SA0111 | SA0122 | SAR0129 | SAS0101 | SAV0126 | MW0100 | butA      | oxidoreductase, short-chain dehydrogenase/reductase family                    | Unknown function | Enzymes of unknown specificity | -5.33                           | -4.82       | -4.67        | -2.31        |
| WANO14G3G_at | 16.8  | 8.3   | 3.9  | 4.3  | 4.0  | SA2021 | SA1841 | SAR2121 | SAS1940 | SAV2034 | MW1958 | gph       | carbon-nitrogen hydrolase family protein                                      | Unknown function | Enzymes of unknown specificity | -2.02                           | -4.28       | -3.92        | -4.25        |
| WANO14H3A_at | 7.2   | 11.3  | 1.9  | 1.7  | 2.3  | SA0002 | SA0513 | SAR0560 | SAS0513 | SAV0555 | MW0510 |           | hydrolase, haloacid dehalogenase-like family                                  | Unknown function | Enzymes of unknown specificity | 1.56                            | -3.71       | -4.32        | -3.21        |
| WANO14H1L_at | 5.2   | 4.8   | 1.5  | 1.5  | 2.4  | SA0569 | SA0482 | SAR0527 | SAS0481 | SAV0524 | MW0479 |           | ATP-guanido phosphotransferase family protein                                 | Unknown function | Enzymes of unknown specificity | -1.09                           | -3.50       | -3.38        | -2.19        |
| WANO14G6U_at | 6.5   | 1.2   | 1.9  | 1.3  | 1.8  | SA0399 | SA0317 | SAR0325 | SAS0305 | SAV0328 | MW0305 |           | oxidoreductase, putative                                                      | Unknown function | Enzymes of unknown specificity | -5.42                           | -3.46       | -5.03        | -3.62        |
| WANO14H6E_at | 2.7   | 2.8   | 0.8  | 0.9  |      | SA0867 | SA0568 | SAR0620 | SAS0579 | SAV0611 | MW0575 |           | hydrolase, putative                                                           | Unknown function | Enzymes of unknown specificity | 1.03                            | -3.45       | -2.90        |              |
| WANO14H4J_at | 2.2   | 2.1   | 0.7  | 0.6  |      | SA1048 | SA0893 | SAR1014 | SAS0976 | SAV1040 |        |           | acetyltransferase, GNAT family                                                | Unknown function | Enzymes of unknown specificity | -1.07                           | -3.29       | -3.86        |              |
| WANO14H4O_at | 6.0   | 6.8   | 2.0  | 1.9  | 1.6  | SA0655 | SA0557 | SAR0608 | SAS0568 | SAV0600 | MW0563 |           | oxidoreductase, aldo/keto reductase 2 family                                  | Unknown function | Enzymes of unknown specificity | 1.14                            | -3.01       | -3.05        | -3.70        |
| WANO14H3E_at | 4.5   | 5.0   | 1.5  | 1.5  | 1.5  | SA0606 | SA0517 | SAR0564 | SAS0517 | SAV0559 | MW0514 |           | hydrolase, haloacid dehalogenase-like family                                  | Unknown function | Enzymes of unknown specificity | 1.10                            | -2.97       | -2.95        | -3.05        |
| WANO14H9O_at | 3.6   | 0.8   | 1.2  | 1.0  | 1.0  | SA0739 | SA0634 | SAR0732 | SAS0644 | SAV0679 | MW0641 |           | acetyltransferase, GNAT family                                                | Unknown function | Enzymes of unknown specificity | -4.38                           | -2.95       | -3.72        | -3.49        |
| WANO14F4U_at | 14.0  | 3.5   | 4.9  | 3.1  | 4.1  | SA2293 | SA2095 | SAR2386 | SAS2192 | SAV2302 | MW2220 |           | NAD/NADP octopine/nopaline dehydrogenase family protein                       | Unknown function | Enzymes of unknown specificity | -3.99                           | -2.84       | -4.58        | -3.44        |
| WANO14H8I_at | 2.5   | 2.7   | 0.9  | 0.8  | 0.9  | SA0668 | SA0569 | SAR0621 | SAS0580 | SAV0612 | MW0576 |           | hydrolase, alpha/beta fold family                                             | Unknown function | Enzymes of unknown specificity | 1.05                            | -2.78       | -3.11        | -2.76        |
| WANO14G75_at | 6.9   | 2.9   | 2.5  | 1.7  | 2.4  | SA2575 | SA2347 | SAR2641 | SAS2446 | SAV2580 | MW2481 |           | aminotransferase, class I                                                     | Unknown function | Enzymes of unknown specificity | -2.37                           | -2.78       | -4.03        | -2.92        |
| WANO14H9B_at | 4.2   | 5.5   | 1.5  | 1.3  | 1.9  | SA1945 | SA1333 | SAR1578 | SAS1442 | SAV1502 | MW1456 |           | oxidoreductase, short-chain dehydrogenase/reductase family                    | Unknown function | Enzymes of unknown specificity | 1.30                            | -2.75       | -3.20        | -2.26        |
| WANO14G6V_at | 13.3  | 3.7   | 4.9  | 4.8  | 4.3  | SA1189 | SA1019 | SAR1152 | SAS1110 | SAV1176 | MW1059 |           | acetyltransferase, GNAT family                                                | Unknown function | Enzymes of unknown specificity | -3.57                           | -2.74       | -2.76        | -3.12        |
| WANO14G6B_at | 1.7   | 1.4   | 0.7  | 0.8  |      | SA0197 | SA0211 | SAR0210 | SAS0194 | SAV0218 | MW0194 |           | oxidoreductase, GlcIidh/MocA family                                           | Unknown function | Enzymes of unknown specificity | -1.20                           | -2.62       | -2.23        |              |
| WANO14G0Q_at | 30.1  | 18.1  | 11.8 | 6.0  | 7.4  | SA2532 | SA2309 | SAR2601 | SAS2406 | SAV2521 | MW2441 |           | acetyltransferase, GNAT family                                                | Unknown function | Enzymes of unknown specificity | -1.66                           | -2.55       | -5.02        | -4.08        |
| WANO14G6L_at | 6.6   | 7.4   | 2.7  | 3.0  | 2.4  | SA2245 | SA2052 | SAR2340 | SAS2146 | SAV2255 | MW1274 |           | acetyltransferase, GNAT family                                                | Unknown function | Enzymes of unknown specificity | 1.11                            | -2.47       | -2.18        | -2.70        |
| WANO14HD9_at | 11.2  | 10.5  | 4.7  | 3.9  | 3.7  | SA0827 | SA0717 | SAR0816 | SAS0727 | SAV0762 | MW0724 |           | acetyltransferase, putative                                                   | Unknown function | Enzymes of unknown specificity | -1.07                           | -2.40       | -2.86        | -3.05        |
| WANO14GMM_at | 23.8  | 6.0   | 10.1 | 6.6  | 7.0  | SA2368 |        | SAR2460 |         |         |        |           | acetyltransferase, GNAT family                                                | Unknown function | Enzymes of unknown specificity | -3.94                           | -2.35       | -3.60        | -3.38        |
| WANO14FUJ_at | 2.9   | 1.8   | 1.3  | 1.1  | 1.3  | SA2303 | SA2104 | SAR2395 | SAS2203 | SAV2311 | MW2231 |           | inositol monophosphatase family protein                                       | Unknown function | Enzymes of unknown specificity | -1.60                           | -2.27       | -2.61        | -2.27        |
| WANO14G2Z_at | 8.0   | 6.5   | 3.8  | 3.0  | 3.5  | SA2488 | SA2266 |         |         |         |        |           | oxidoreductase, short-chain dehydrogenase/reductase family                    | Unknown function | Enzymes of unknown specificity | -1.24                           | -2.13       | -2.70        | -2.27        |
| WANO14H7J_at | 19.2  | 18.1  | 9.2  | 7.2  | 8.1  | SA1625 | SA1397 | SAR1645 | SAS1506 | SAV1568 | MW1520 | cdd       | cytidine and deoxycytidylate deaminase family protein                         | Unknown function | Enzymes of unknown specificity | -1.06                           | -2.09       | -2.69        | -2.38        |
| WANO14HJT_at | 6.7   | 6.0   | 3.3  | 2.4  | 2.3  | SA1835 | SA1606 | SAR1868 | SAS1709 | SAV1788 | MW1726 |           | oxidoreductase, aldo/keto reductase family                                    | Unknown function | Enzymes of unknown specificity | -1.13                           | -2.05       | -2.84        | -2.92        |
| WANO14H6P_at | 8.1   | 4.0   | 2.6  | 4.1  |      | SA0671 | SA0572 | SAR0624 | SAS0583 | SAV0615 | MW0579 |           | hydrolase, alpha/beta fold family                                             | Unknown function | Enzymes of unknown specificity | 2.02                            | -3.14       | -1.98        |              |
| WANO14HYD_at | 3.2   | 2.3   | 1.6  | 1.3  | 1.9  | SA1188 | SA1018 | SAR1151 | SAS1109 | SAV1175 | MW1058 |           | hydrolase, haloacid dehalogenase-like family                                  | Unknown function | Enzymes of unknown specificity | -1.37                           | -1.99       | -2.46        | -1.65        |
| WANO14H0Z_at | 40.6  | 13.5  | 4.2  | 3.7  | 5.3  | SA2660 | SA2431 |         | SA2524  | SAV2638 | MW2559 | isaB      | immunodominant antigen B                                                      | Unknown function | General                        | -3.02                           | -6.55       | -10.91       | -7.70        |
| WANO14G2S_at | 16.3  | 0.8   | 2.8  | 2.0  | 3.0  | SA2464 | SA2262 | SAR2561 | SAS2365 | SAV2474 | MW2398 |           | allylhydroperoxidase, AhpD family                                             | Unknown function | General                        | -20.07                          | -6.83       | -8.22        | -5.45        |
| WANO14G2P_at | 3.4   | 6.0   | 0.6  | 0.5  | 1.2  | SA0313 | SA0305 | SAR0313 | SAS0293 | SAV0316 | MW0293 |           | RCK family protein                                                            | Unknown function | General                        | 1.77                            | -5.27       | -6.32        | -2.90        |
| WANO14H2Q_at | 110.8 | 14.3  | 21.9 | 14.5 | 16.1 | SA1933 | SA1692 | SAR1965 | SAS1797 | SAV1875 | MW1815 |           | ThiJ/PilP family protein                                                      | Unknown function | General                        | -7.73                           | -6.06       | -7.64        | -6.88        |
| WANO14H9V_at | 6.1   | 1.8   | 1.5  | 1.4  | 1.4  | SA0410 | SA0328 |         | SA50316 | SAV0340 | MW0316 |           | FMN reductase-related protein                                                 | Unknown function | General                        | -3.42                           | -4.10       | -4.34        | -4.24        |
| WANO14G6U_at | 3.5   | 1.0   | 1.0  | 1.0  | 1.3  | SA0408 | SA0326 | SAR0334 | SA50314 | SAV0538 | MW0514 |           | glyoxalase family protein                                                     | Unknown function | General                        | -3.68                           | -3.65       | -3.41        | -2.77        |
| WANO14H3T_at | 105.8 | 42.6  | 29.5 | 20.3 | 30.1 | SA0618 | SA0529 | SAR0575 | SAS0529 | SAV0571 | MW0526 |           | SIS domain protein                                                            | Unknown function | General                        | -2.48                           | -3.59       | -5.21        | -3.52        |
| WANO14G8E_at | 4.7   | 4.4   | 1.4  | 1.1  | 1.5  | SA2602 | SA2372 |         |         |         |        |           | chromosome assembly protein homolog, putative                                 | Unknown function | General                        | -1.06                           | -3.33       | -4.29        | -3.06        |
| WANO14H4G_at | 4.1   | 1.3   | 1.4  | 0.9  | 1.2  | SA0921 | SA0780 | SAR0882 | SAS0790 | SAV0919 | MW0802 |           | hemolysin, putative                                                           | Unknown function | General                        | -3.13                           | -2.93       | -4.54        | -3.44        |
| WANO14H4H_at | 3.0   | 4.3   | 1.1  | 1.2  | 1.1  | SA0931 | SA0790 | SAR0891 | SAS0799 | SAV0929 | MW0811 | pho2      | p-nitrophenyl phosphatase                                                     | Unknown function | General                        | -1.42                           | -2.63       | -2.47        | -2.76        |
| WANO14H7S_at | 6.7   | 4.1   | 2.7  | 2.3  | 2.6  | SA1628 | SA1400 | SAR1648 | SAS1509 | SAV1571 | MW1523 | phoH      | PhoH family protein                                                           | Unknown function | General                        | -1.63                           | -2.46       | -2.91        | -2.54        |
| WANO14G4F_at | 53.6  | 44.3  | 22.5 | 17.5 | 19.9 | SA2866 | SA2437 | SAR2723 | SAS2530 | SAV2844 | MW2565 |           | N-acetylmuramoyl-L-alanine amidase domain protein                             | Unknown function | General                        | -1.21                           | -2.39       | -3.07        | -2.89        |
| WANO14G0U_at | 2.2   | 1.6   | 0.9  | 1.1  | 1.3  | SA1894 | SA1656 | SAR1929 | SAS1759 | SAV1836 | MW1778 |           | HIT family protein                                                            | Unknown function | General                        | -1.32                           | -2.38       | -2.04        | -1.62        |
| WANO14H5S_at | 2.2   | 3.7   | 0.9  | 1.0  | 1.1  | SA0657 | SA0559 | SAR0610 | SAS0570 | SAV0602 | MW0565 |           | protease synthase and sporulation negative regulatory protein pai 1, putative | Unknown function | General                        | 1.66                            | -2.36       | -2.14        | -1.95        |
| WANO14H6J_at | 2.0   | 1.6   | 0.9  | 0.8  | 0.8  | SA1607 | SA1380 | SAR1627 | SAS1488 | SAV1550 | MW1502 |           | 5-formyltetrahydrofolate cyclo-ligase family protein                          | Unknown function | General                        | -1.27                           | -2.29       | -2.43        | -2.63        |
| WANO14G2Z_at | 11.6  | 10.5  | 5.1  | 3.9  | 4.3  | SA1460 | SA1258 | SAR1438 | SAS1388 | SAV1425 | MW1315 | degV      | degV family protein                                                           | Unknown function | General                        | -1.11                           | -2.28       | -2.96        | -2.69        |
| WANO14H5V_at | 9.4   | 15.0  | 4.2  | 3.5  | 3.8  | SA0658 | SA0600 | SAR0611 | SAS0571 | SAV0603 | MW0566 |           | HD domain protein                                                             | Unknown function | General                        | 1.59                            | -2.25       | -2.71        | -2.45        |
| WANO14G0S_at | 12.2  | 13.0  | 5.6  | 3.7  | 4.8  | SA0022 | SA0020 | SAR0021 | SAS0021 | SAV0021 | MW0021 | yycI      | yycI protein                                                                  | Unknown function | General                        | 1.06                            | -2.19       | -3.33        | -2.55        |
| WANO14G2Z_at | 10.8  | 15.8  | 5.1  | 25.2 | 23.0 | SA0541 | SA0436 | SAR0499 | SAS0465 | SAV0498 | MW0453 | spoVG     | stage V sporulation protein G                                                 | Unknown function | General                        | -6.75                           | -2.09       | -4.23        | -4.65        |
| WANO14H4J_at | 116.7 | 113.4 | 57.9 | 50.8 | 48.7 | SA0977 | SA0933 | SAR0935 | SAS0942 | SAV0972 | MW0954 |           | mrp protein homolog                                                           | Unknown function | General                        | -1.03                           | -2.02       | -2.30        | -2.40        |
